# Supplementary material for: Design, synthesis and biological evaluation of tetrahydroquinoxaline sulfonamide derivatives as colchicine binding site inhibitors
Source: Royal Society of Chemistry journal article supplement (doi:10.1039/d3ra05720h), 2023-01-01
Supplement: d3ra05720h1.pdf [file d3ra05720h1.pdf]

# Design, Synthesis and Biological Evaluation of Tetrahydroquinoxaline Sulfonamide Derivatives as Colchicine Binding Site Inhibitors

Haiyang Dong <sup>1, †</sup>, Lu Lu <sup>1, †</sup>, Xueting Song <sup>1</sup>, Youkang Li <sup>1</sup>, Jinguang Zhou <sup>2</sup>, Yungen Xu <sup>3</sup>, Yahong Zhang <sup>1</sup>, Jianguo Qi <sup>1</sup>, Tingting Liang <sup>1, \*</sup>, Jianhong Wang <sup>1, \*</sup>

<sup>1</sup> Key Laboratory of Natural Medicine and Immune-Engineering of Henan Province, Henan University Jinming Campus, Kaifeng 475004, Henan, China

<sup>2</sup> Huaihe Hospital of Henan University, Kaifeng 475004, Henan, China

<sup>3</sup> Jiangsu Key Laboratory of Drug Design and Optimization, Department of Medicinal Chemistry, China Pharmaceutical University, Nanjing, 211198, China

† These authors contributed equally to this work.

\* Corresponding authors

E-mail address: [liangting910710@126.com](mailto:liangting910710@126.com), [jhworg@126.com](mailto:jhworg@126.com)

CONTENTS:

<sup>1</sup>H-NMR, <sup>13</sup>C-NMR, HRMS spectra and HPLC purity of target compounds

## I-1

<sup>1</sup>H-NMR

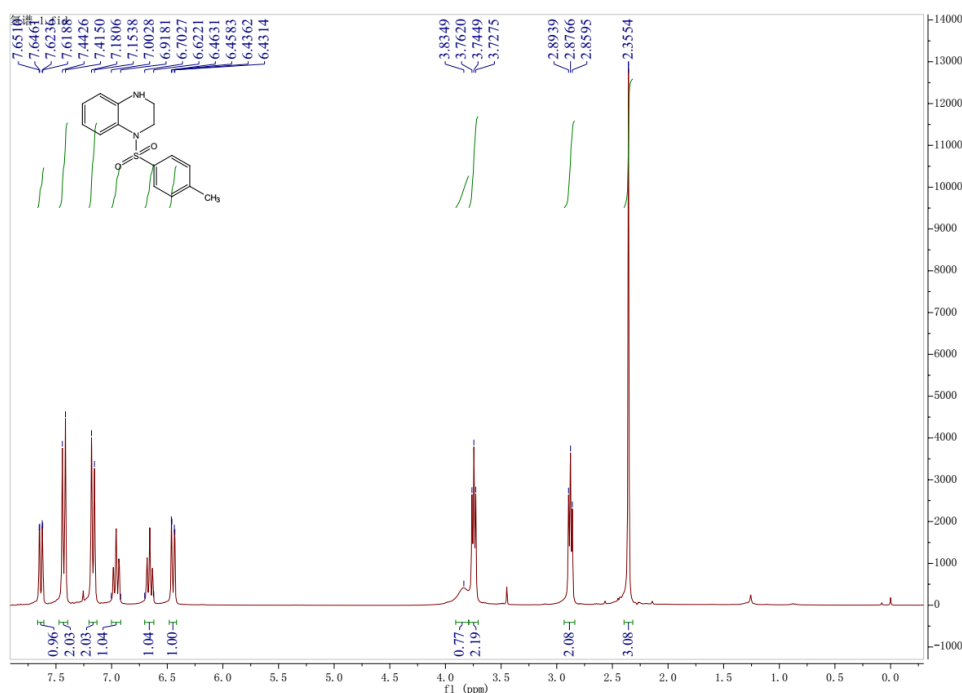

# <sup>13</sup>C-NMR

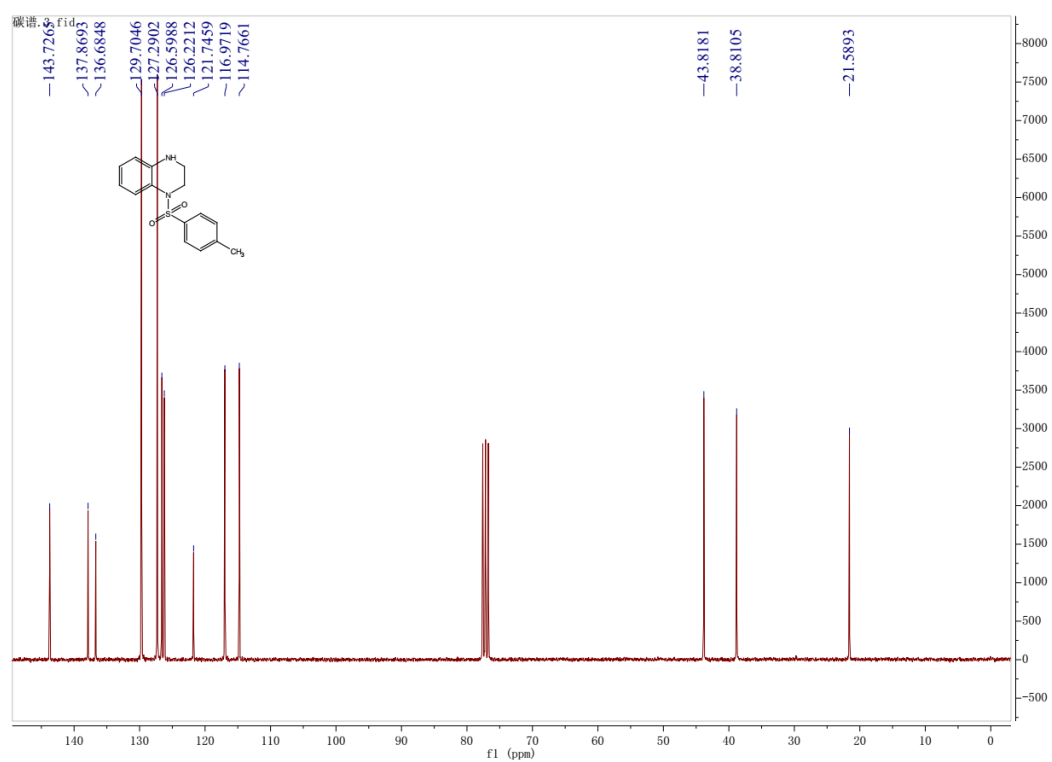

# HRMS

D:\DATA\20221205\1W-1

12/05/22 10:20:03

I-1 #27 RT: 0.12 AV: 1 NL: 1.52E9  
T: FTMS + p ESI Full ms [105.0000-1500.0000]

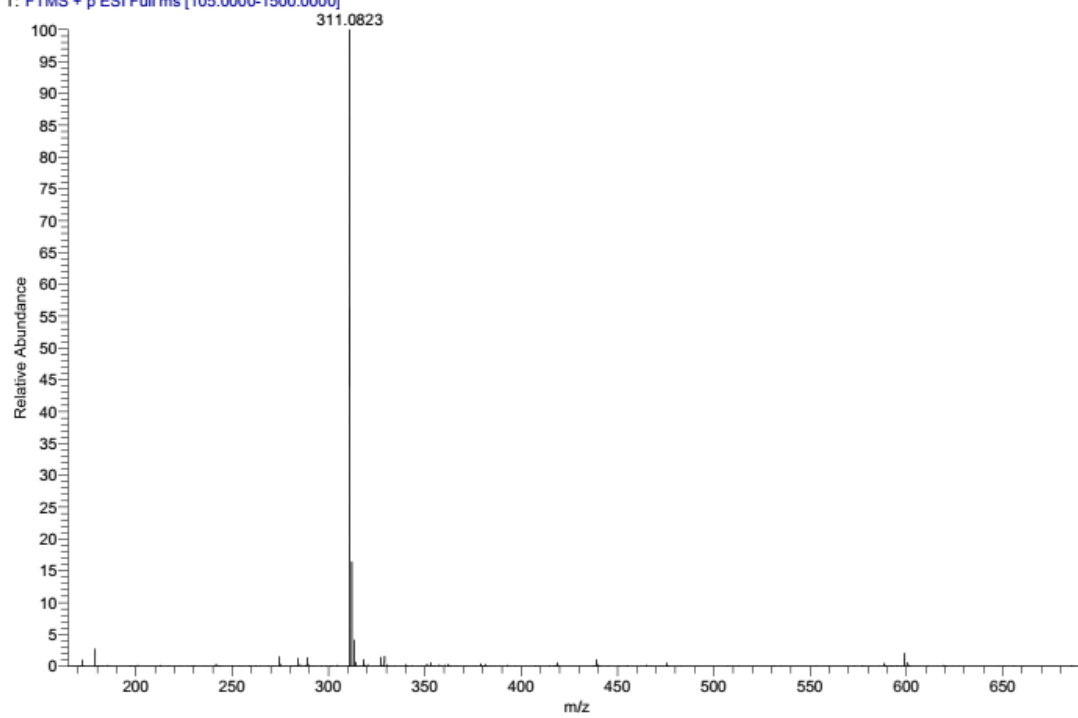

HPLC purity

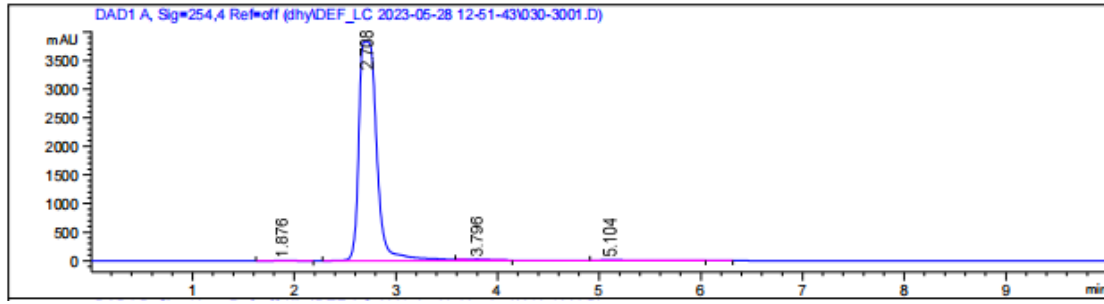

| 峰 # | 保留时间 [min] | 类型   | 峰宽 [min] | 峰面积 [mAU*s] | 峰高 [mAU]   | 峰面积 %   |
|-----|------------|------|----------|-------------|------------|---------|
| 1   | 1.876      | BB   | 0.1203   | 60.01942    | 7.12340    | 0.1253  |
| 2   | 2.708      | BV R | 0.1949   | 4.74981e4   | 3824.65894 | 99.1599 |
| 3   | 3.796      | VV E | 0.1867   | 134.84851   | 11.02645   | 0.2815  |
| 4   | 5.104      | VB E | 0.2326   | 207.53053   | 13.55431   | 0.4333  |

## I-2

### <sup>1</sup>H-NMR

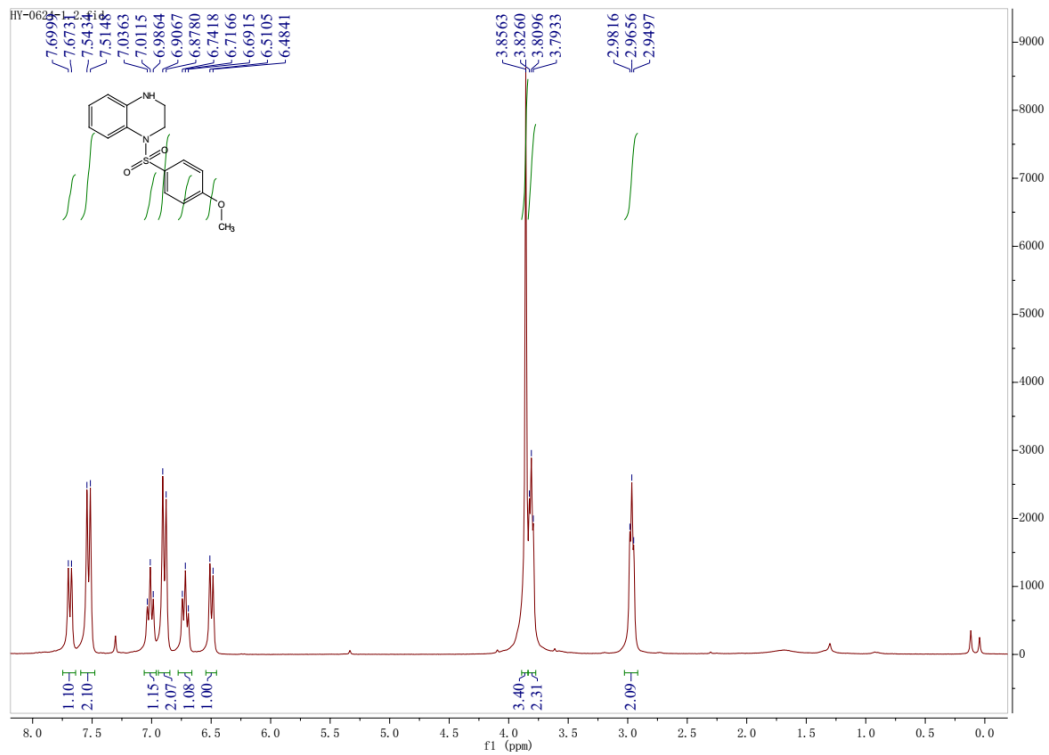

### <sup>13</sup>C-NMR

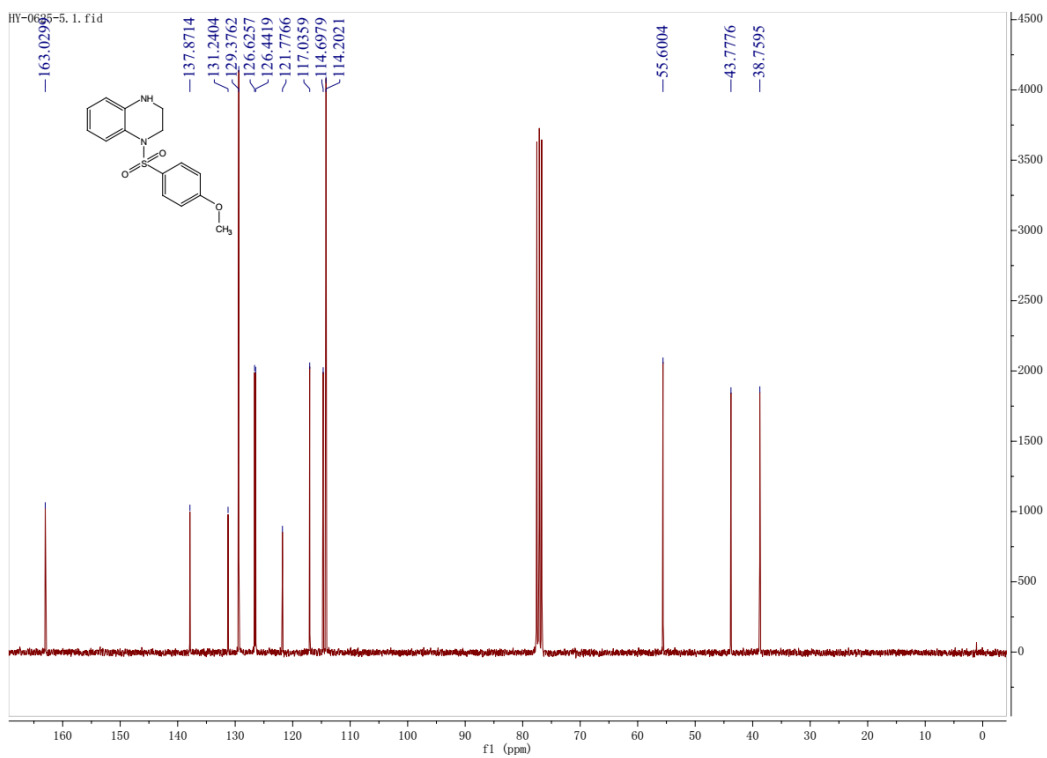

## HRMS

D:\DATA\20221205\1\1-2

12/05/22 10:23:13

I-2 #29-31 RT: 0.13-0.14 AV: 3 NL: 2.28E8  
T: FTMS + p ESI Full ms [105.0000-1500.0000]

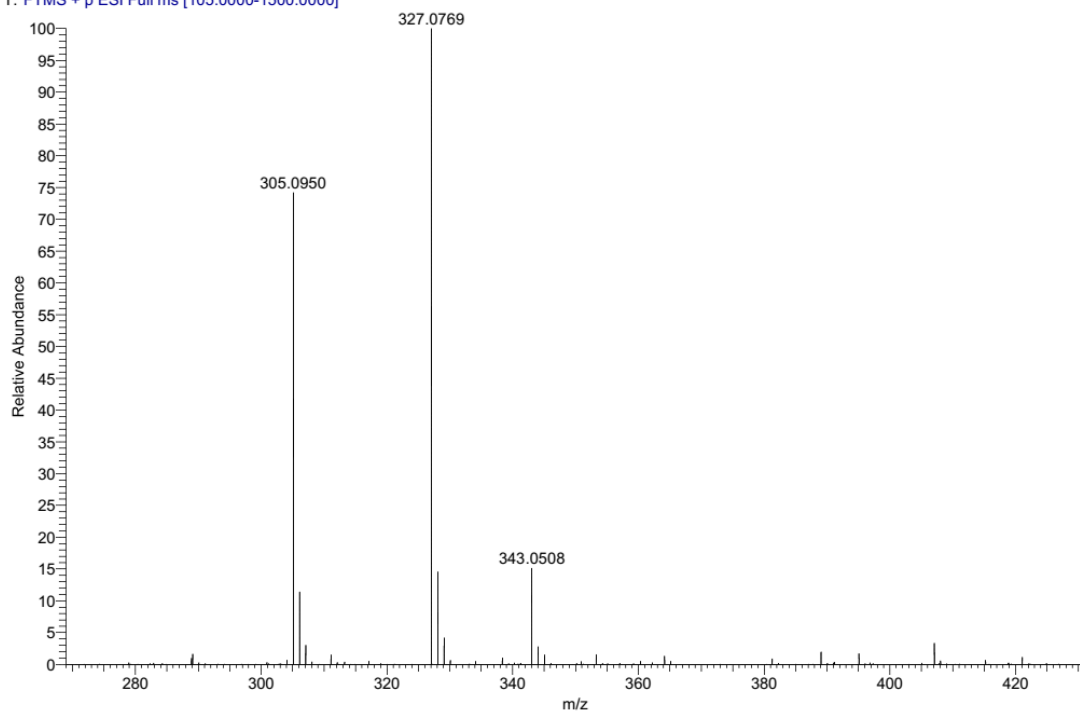

HPLC purity

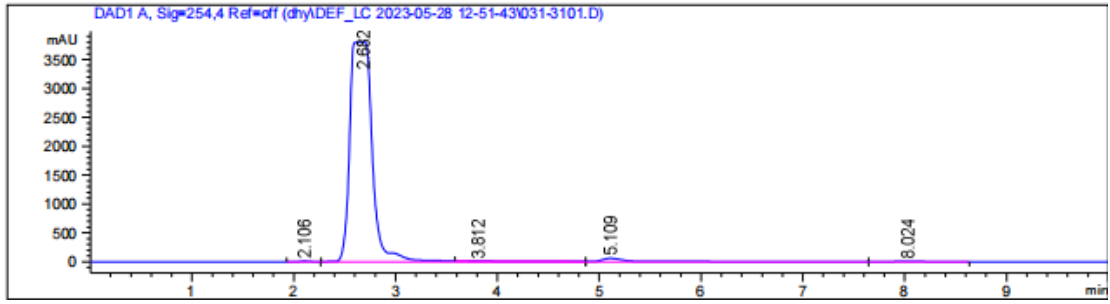

| 峰 # | 保留时间 [min] | 类型   | 峰宽 [min] | 峰面积 [mAU*s] | 峰高 [mAU]   | 峰面积 %   |
|-----|------------|------|----------|-------------|------------|---------|
| 1   | 2.106      | BB   | 0.0758   | 46.87372    | 9.79933    | 0.0793  |
| 2   | 2.682      | BV R | 0.2400   | 5.79879e4   | 3800.25659 | 98.0913 |
| 3   | 3.812      | VV E | 0.3947   | 204.96324   | 6.85751    | 0.3467  |
| 4   | 5.109      | VB   | 0.2236   | 850.55853   | 57.83422   | 1.4388  |
| 5   | 8.024      | BB   | 0.3025   | 25.98289    | 1.33831    | 0.0440  |

### I-3

#### <sup>1</sup>H-NMR

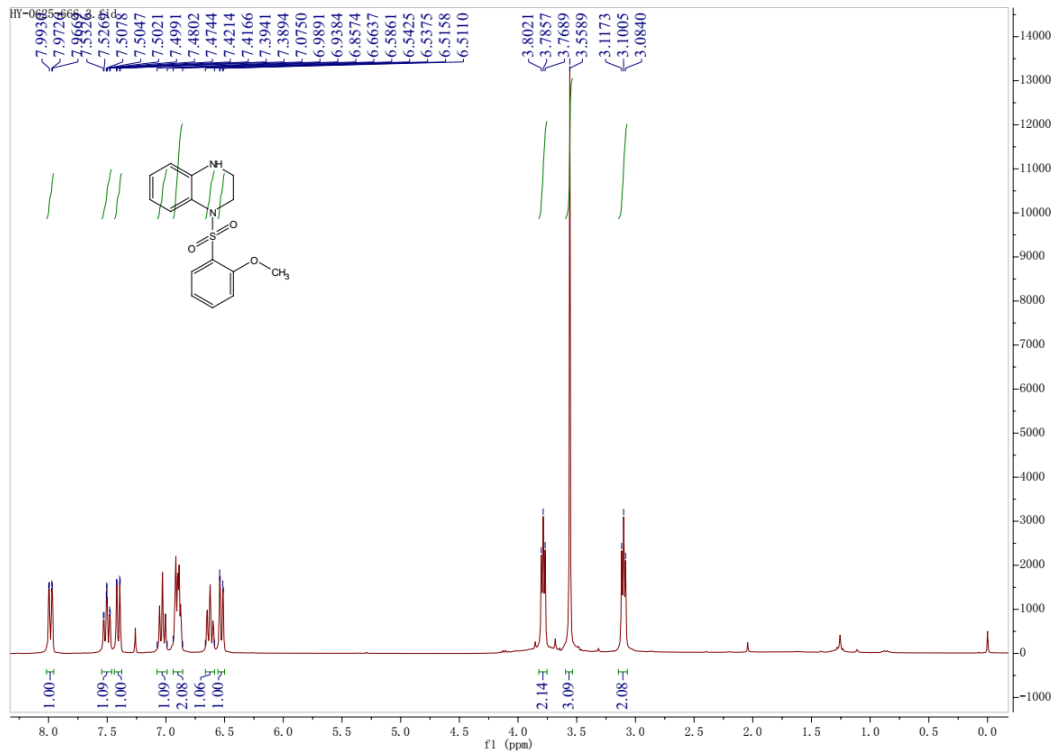

#### <sup>13</sup>C-NMR

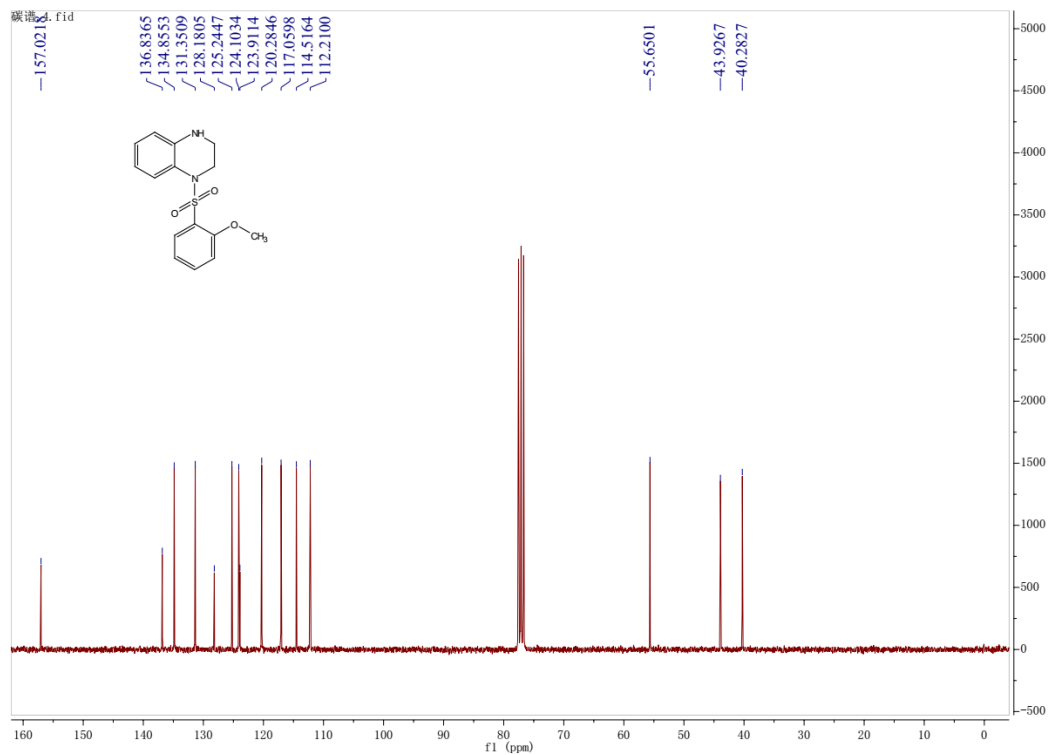

## HRMS

D:\DATA\20221205\1\1-3

12/05/22 10:25:13

I-3 #24-27 RT: 0.11-0.12 AV: 4 NL: 5.58E8  
T: FTMS + p ESI Full ms [105.0000-1500.0000]

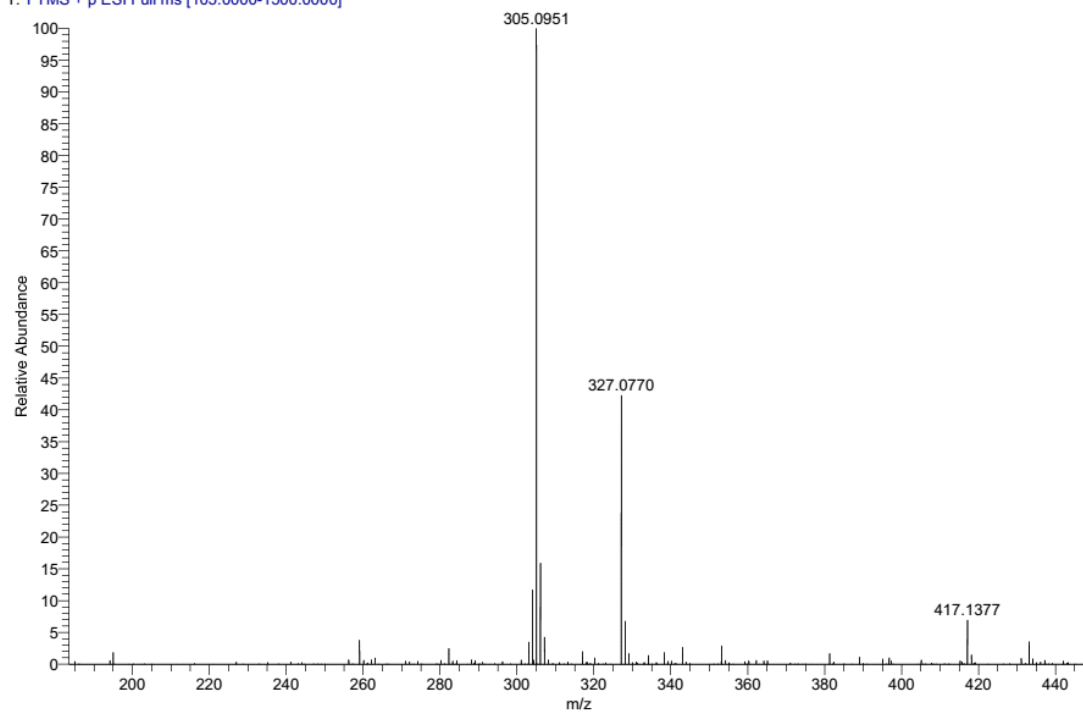

HPLC purity

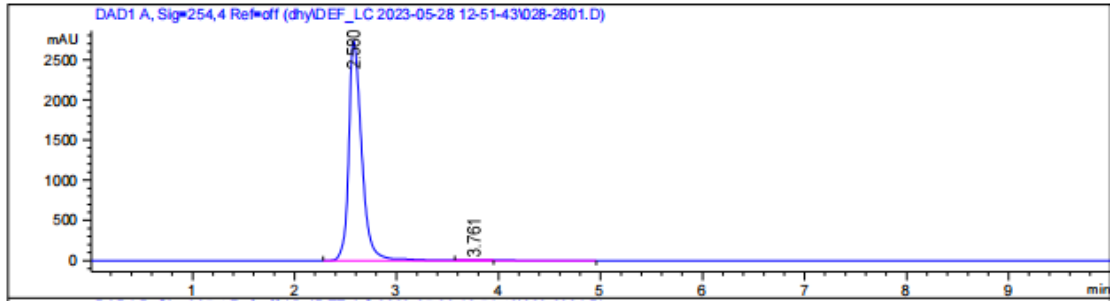

| 峰 # | 保留时间 [min] | 类型   | 峰宽 [min] | 峰面积 [mAU*s] | 峰高 [mAU]   | 峰面积 %   |
|-----|------------|------|----------|-------------|------------|---------|
| 1   | 2.580      | BV R | 0.1366   | 2.44404e4   | 2726.32520 | 99.8812 |
| 2   | 3.761      | VB E | 0.1703   | 29.06045    | 2.72828    | 0.1188  |

#### I-4

#### <sup>1</sup>H-NMR

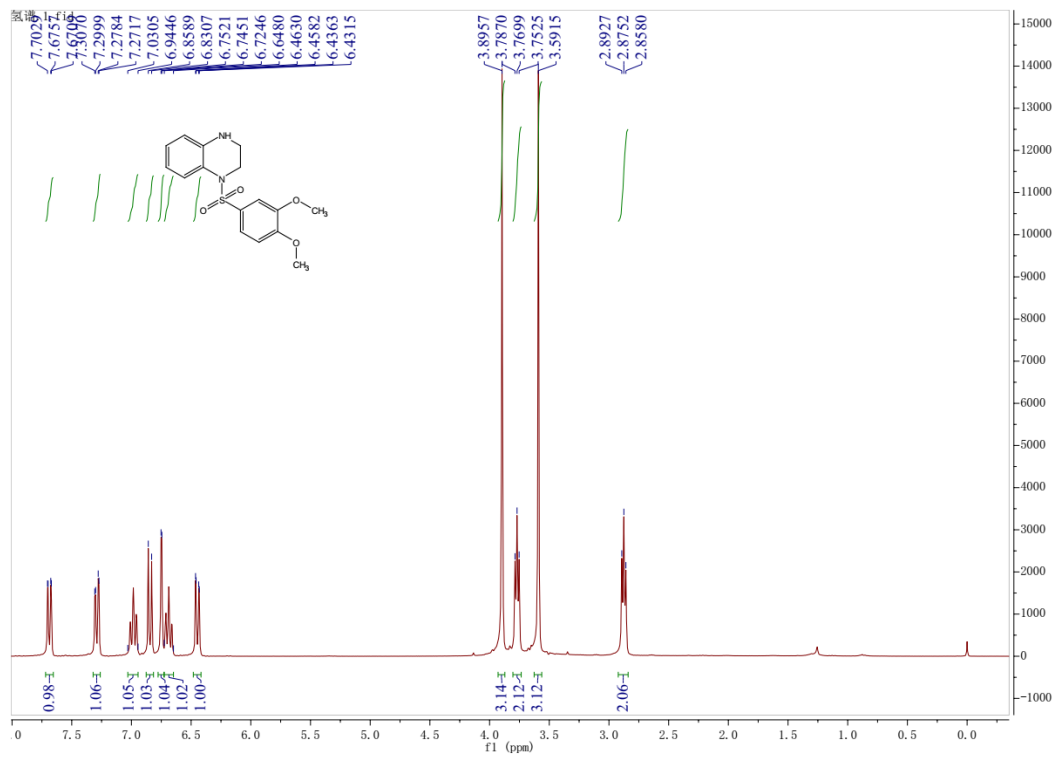

#### <sup>13</sup>C-NMR

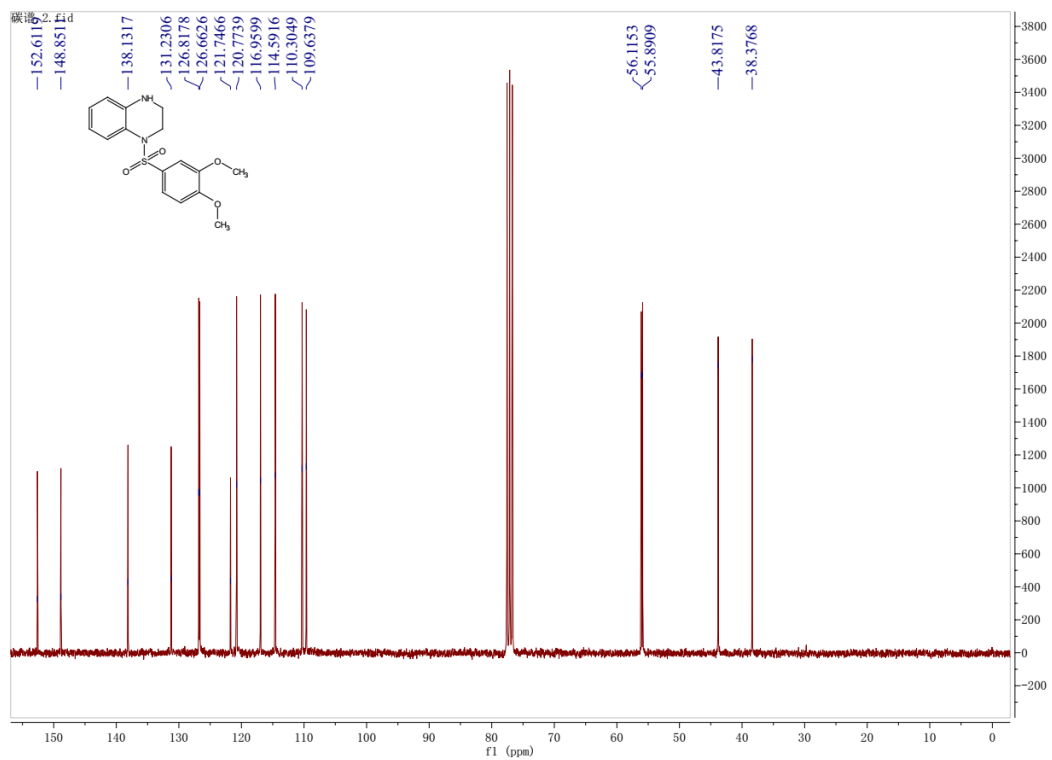

## HRMS

D:\DATA\2022120511\4

12/05/22 10:27:14

I-4 #22-28 RT: 0.10-0.12 AV: 7 NL: 8.54E8  
T: FTMS + p ESI Full ms [105.0000-1500.0000]

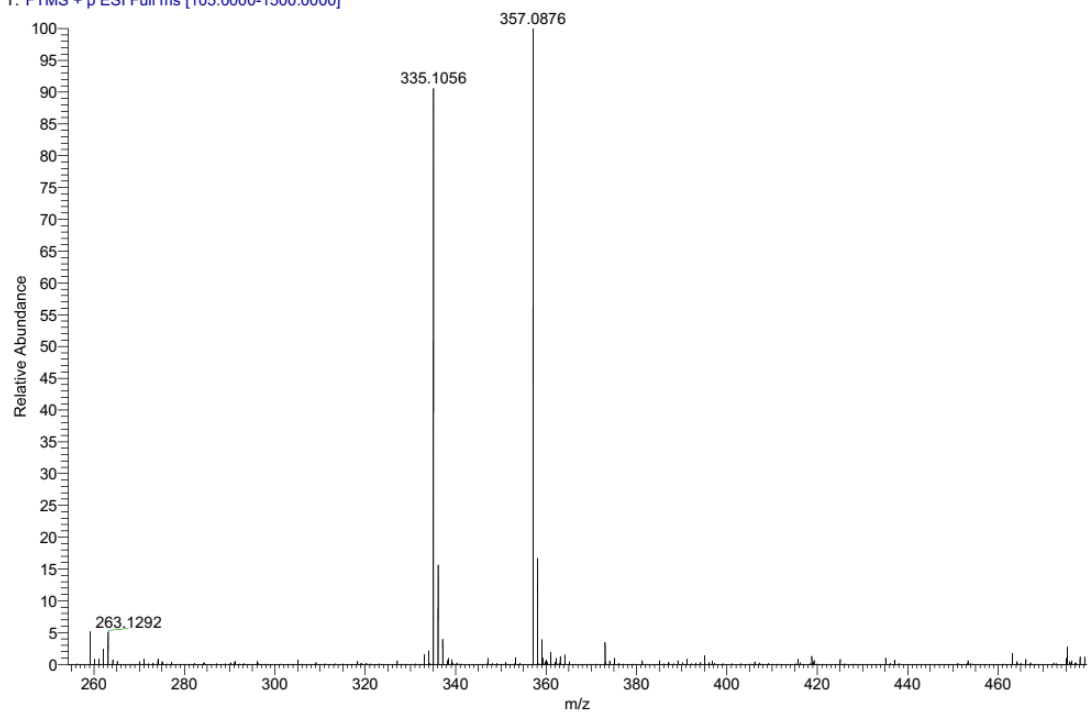

HPLC purity



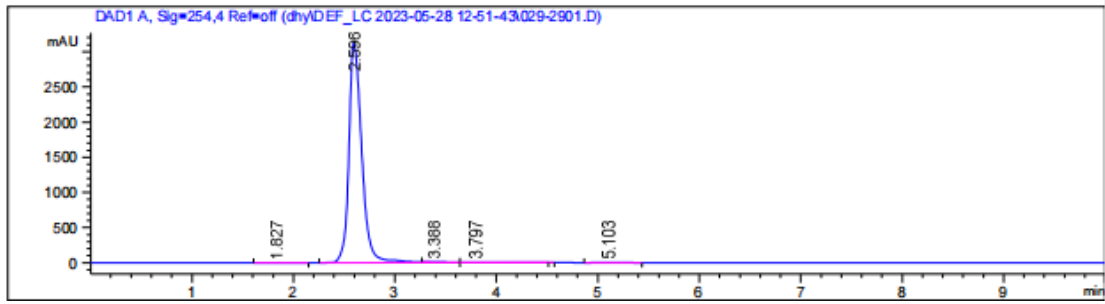

| 峰 # | 保留时间 [min] | 类型   | 峰宽 [min] | 峰面积 [mAU*s] | 峰高 [mAU]   | 峰面积 %   |
|-----|------------|------|----------|-------------|------------|---------|
| 1   | 1.827      | BB   | 0.1563   | 15.19031    | 1.26285    | 0.0540  |
| 2   | 2.596      | BV R | 0.1364   | 2.78831e4   | 3116.74927 | 99.1785 |
| 3   | 3.388      | VV E | 0.2500   | 50.90475    | 2.93949    | 0.1811  |
| 4   | 3.797      | VB E | 0.2468   | 98.68674    | 5.67783    | 0.3510  |
| 5   | 5.103      | BB   | 0.1928   | 66.18219    | 5.48524    | 0.2354  |

## I-5

### <sup>1</sup>H-NMR

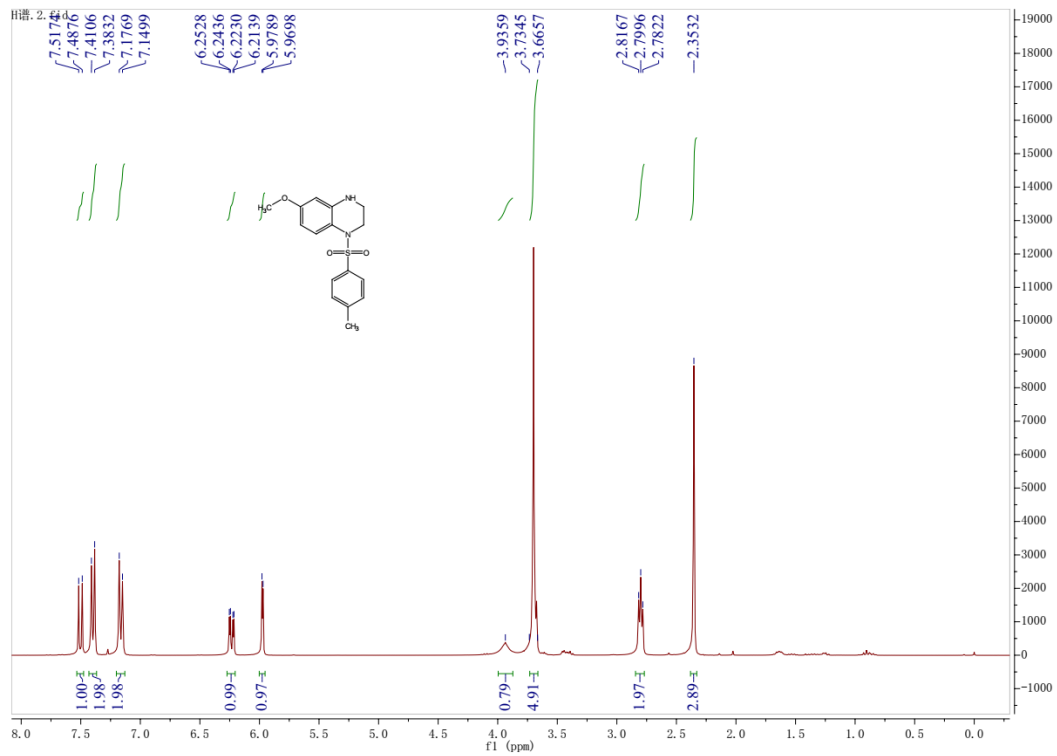

### <sup>13</sup>C-NMR

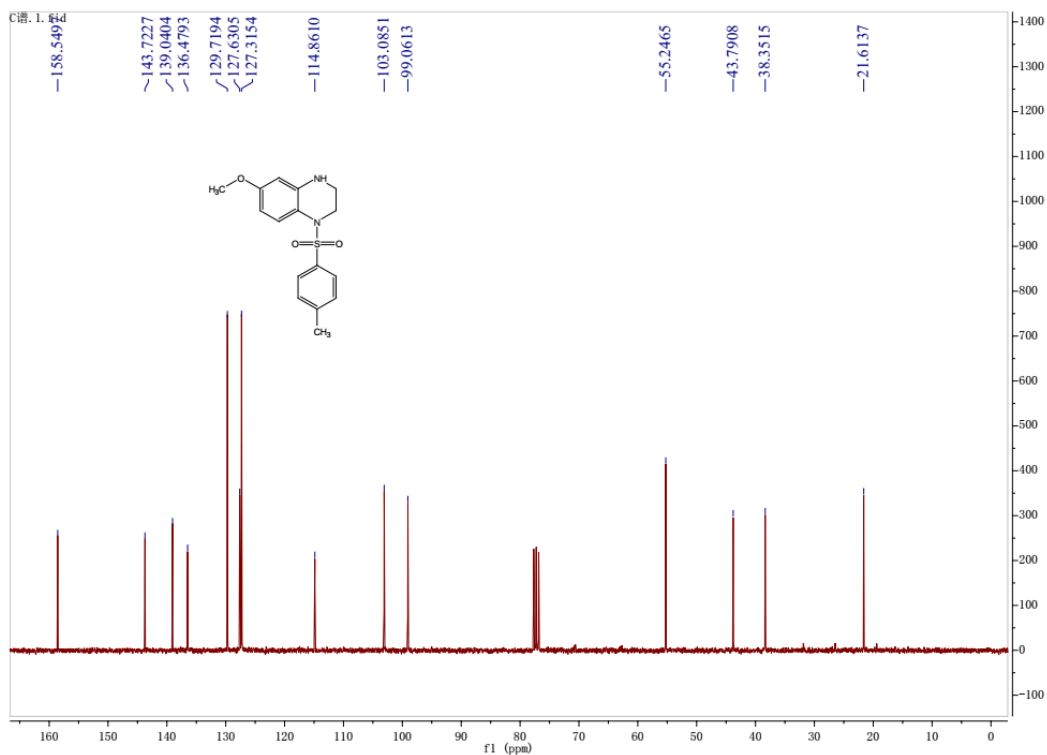

## HRMS

D:\DATA\2022120511\5

12/05/22 10:29:15

I-5 #23-26 RT: 0.10-0.11 AV: 4 NL: 2.52E9  
T: FTMS + p ESI Full ms [105.0000-1500.0000]

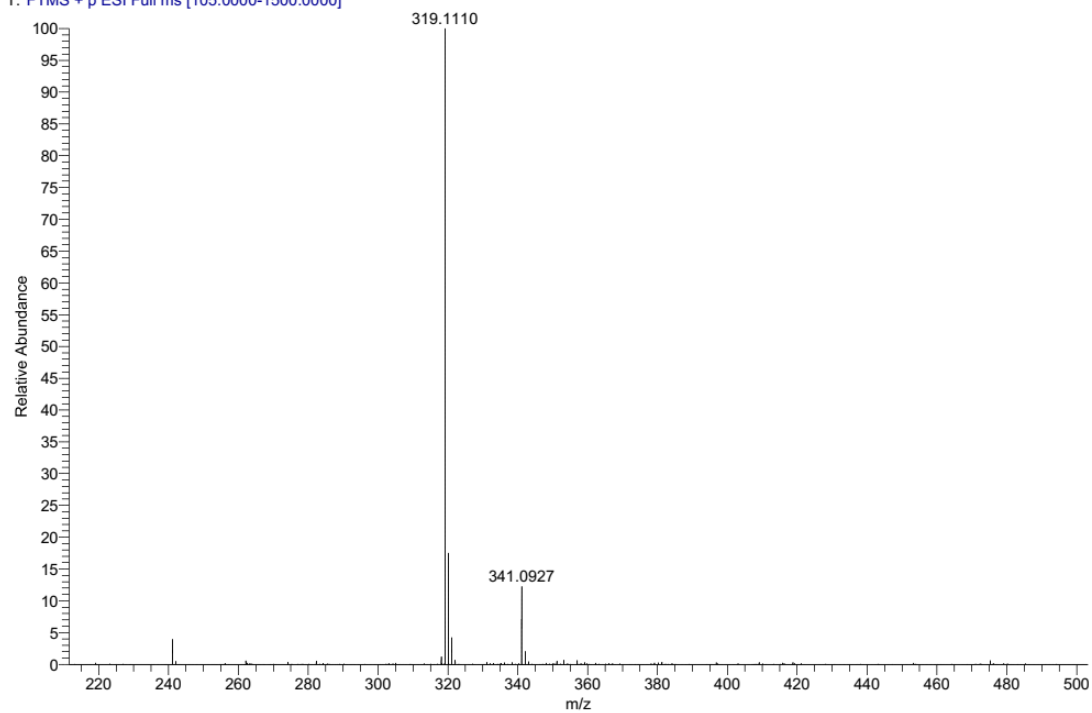

HPLC purity

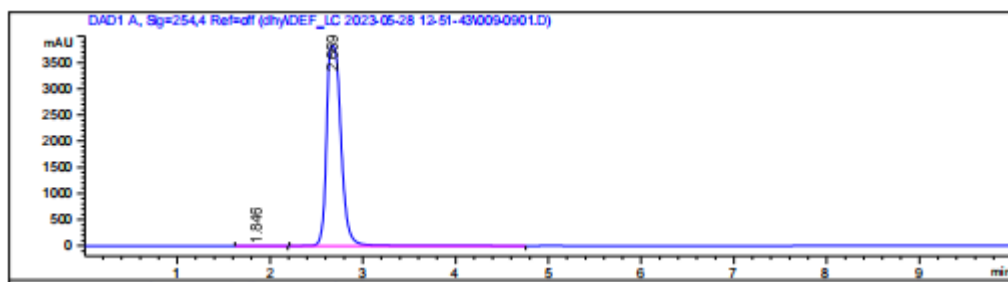

| 峰 # | 保留时间 [min] | 类型   | 峰宽 [min] | 峰面积 [mAU*s] | 峰高 [mAU]   | 峰面积 %   |
|-----|------------|------|----------|-------------|------------|---------|
| 1   | 1.846      | BB   | 0.1410   | 12.63274    | 1.16048    | 0.0306  |
| 2   | 2.669      | BV R | 0.1681   | 4.12785e4   | 3819.05420 | 99.9694 |

## I-6

### <sup>1</sup>H-NMR

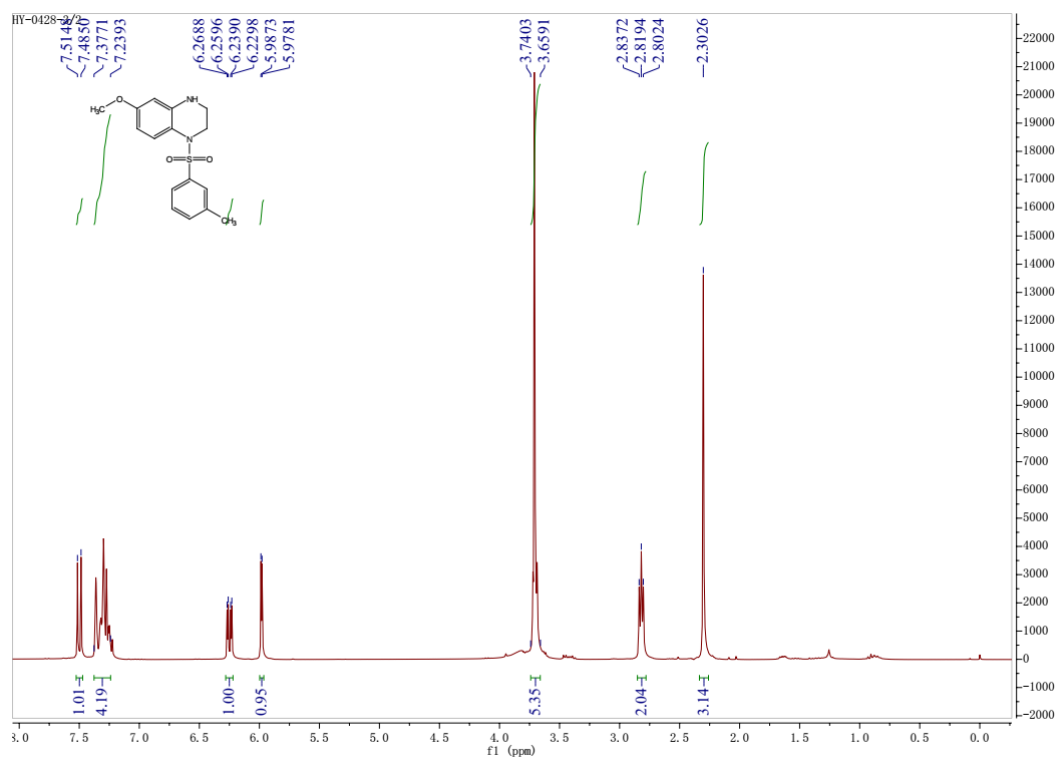

### <sup>13</sup>C-NMR

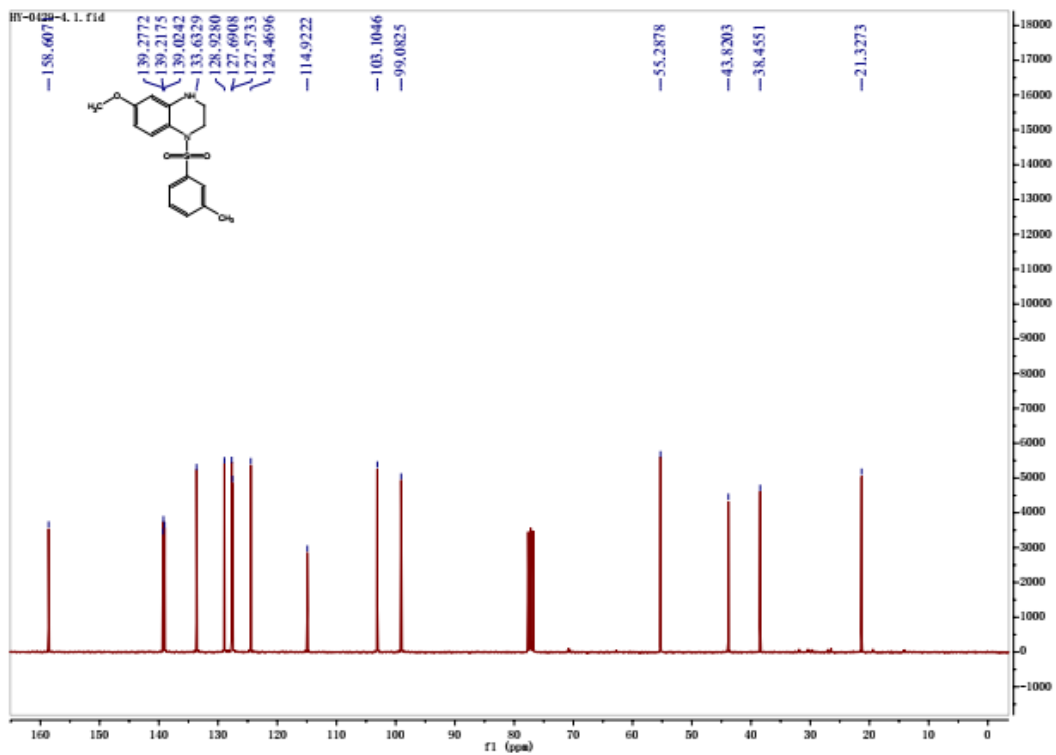

## HRMS

D:\DATA\20221205\1\6

12/05/22 10:31:17

I-6 #23-31 RT: 0.10-0.14 AV: 9 NL: 2.61E9  
T: FTMS + p ESI Full ms [105.0000-1500.0000]

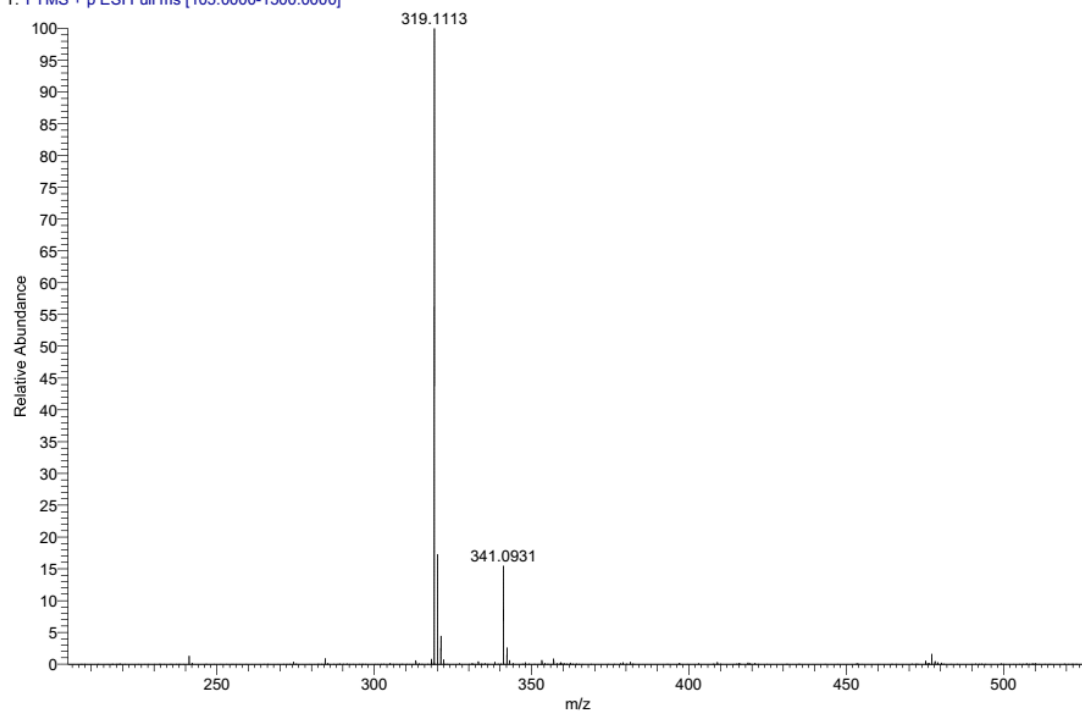

HPLC purity

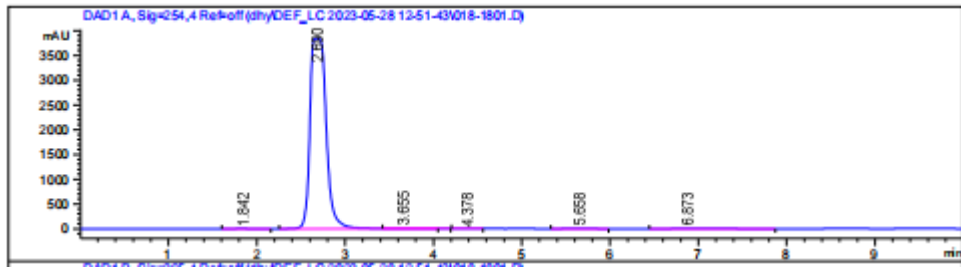

| 峰 # | 保留时间 [min] | 类型   | 峰宽 [min] | 峰面积 [mAU*s] | 峰高 [mAU]   | 峰面积 %   |
|-----|------------|------|----------|-------------|------------|---------|
| 1   | 1.842      | BB   | 0.1503   | 30.64877    | 2.74327    | 0.0626  |
| 2   | 2.690      | BV R | 0.2002   | 4.87124e4   | 3833.69238 | 99.5411 |
| 3   | 3.655      | VB E | 0.2686   | 80.24499    | 4.71499    | 0.1640  |
| 4   | 4.378      | BB   | 0.1583   | 19.44459    | 2.02010    | 0.0397  |
| 5   | 5.658      | BB   | 0.2522   | 35.94201    | 2.20410    | 0.0734  |
| 6   | 6.873      | BB   | 0.4421   | 58.27518    | 1.71636    | 0.1191  |

## I-7

### <sup>1</sup>H-NMR

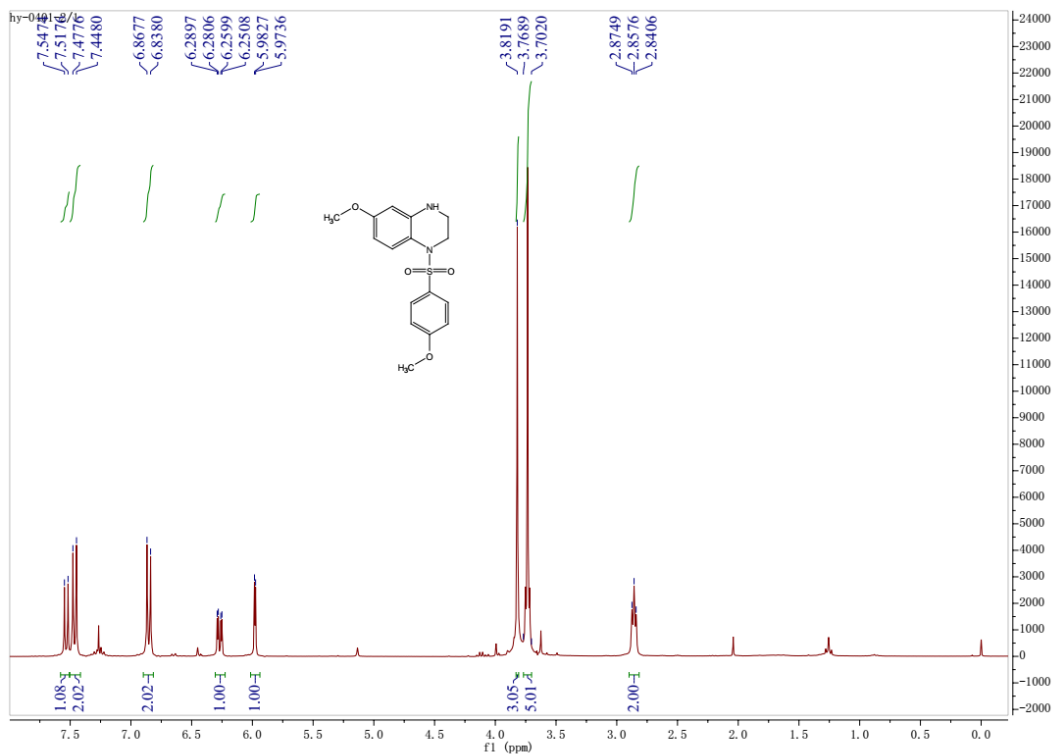

### <sup>13</sup>C-NMR

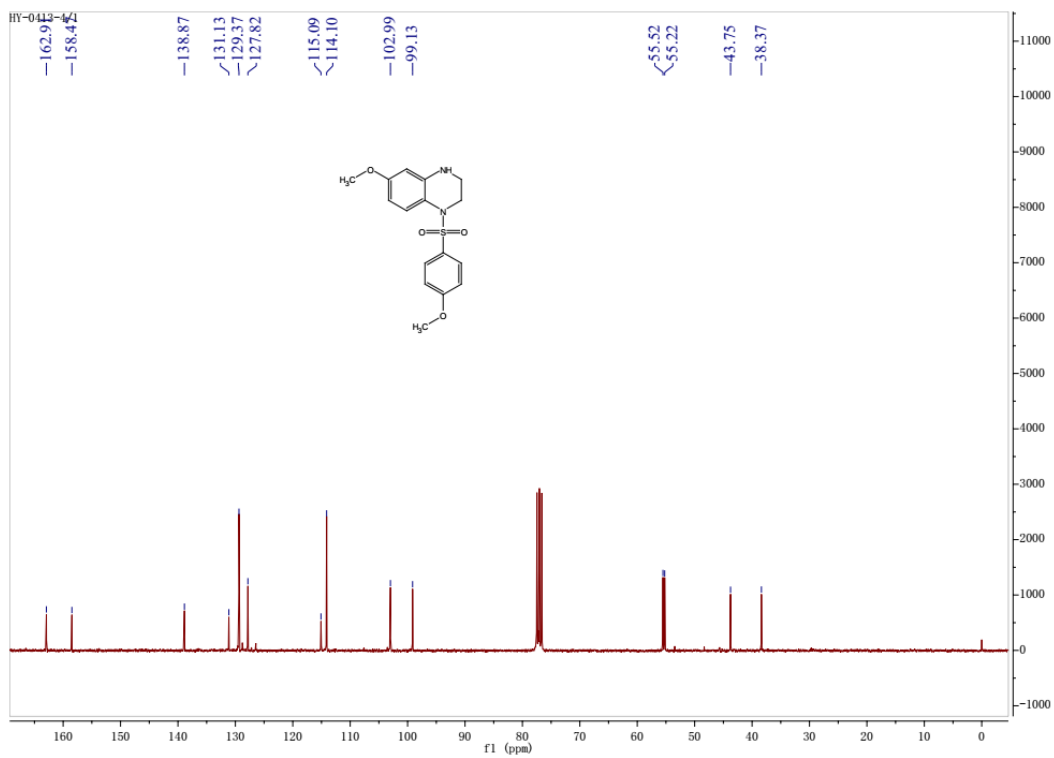

## HRMS

D:\DATA\20221205\1W-7

12/05/22 10:33:18

I-7 #22-26 RT: 0.10-0.11 AV: 5 NL: 2.20E9  
T: FTMS + p ESI Full ms [105.0000-1500.0000]

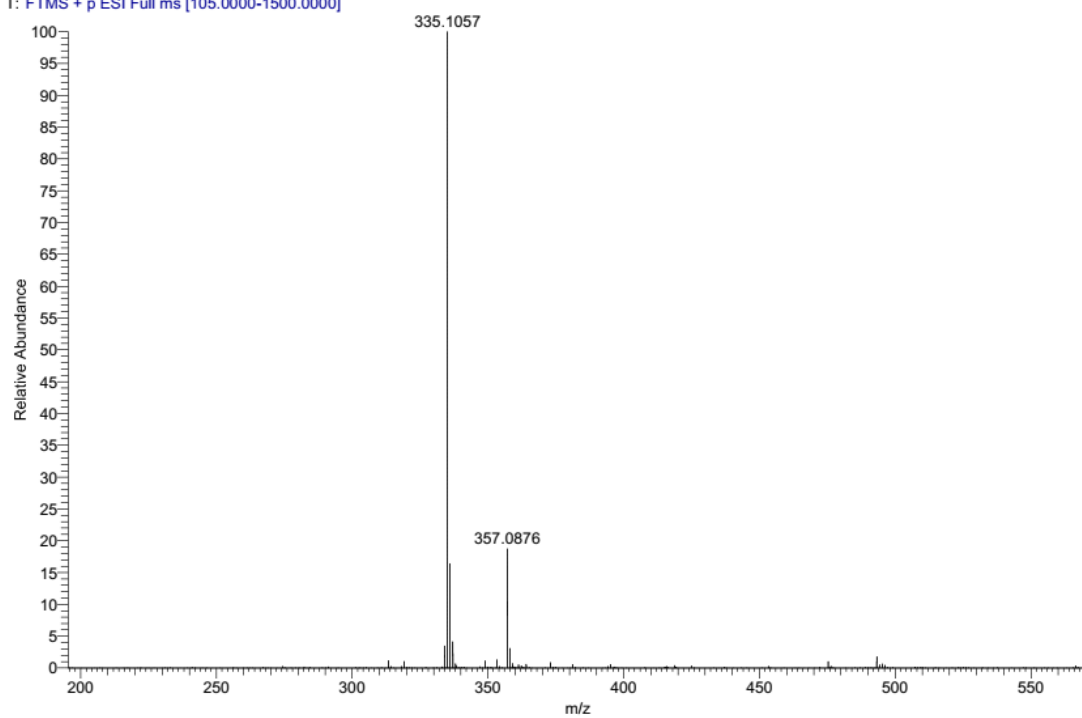

HPLC purity

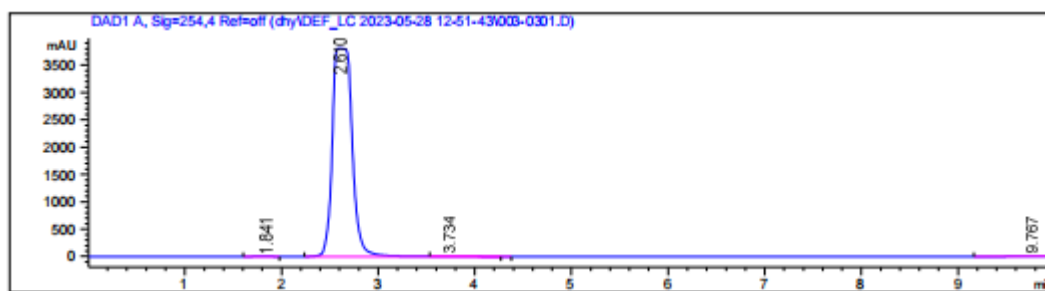

| 峰 # | 保留时间 [min] | 类型   | 峰宽 [min] | 峰面积 [mAU*s] | 峰高 [mAU]   | 峰面积 %   |
|-----|------------|------|----------|-------------|------------|---------|
| 1   | 1.841      | BB   | 0.1791   | 54.24645    | 5.22697    | 0.1001  |
| 2   | 2.610      | BV R | 0.1958   | 5.40901e4   | 3806.97510 | 99.7772 |
| 3   | 3.734      | VB E | 0.2056   | 26.48428    | 1.86600    | 0.0489  |
| 4   | 9.767      | BBA  | 0.4199   | 40.03496    | 1.55758    | 0.0739  |

## I-8

### <sup>1</sup>H-NMR

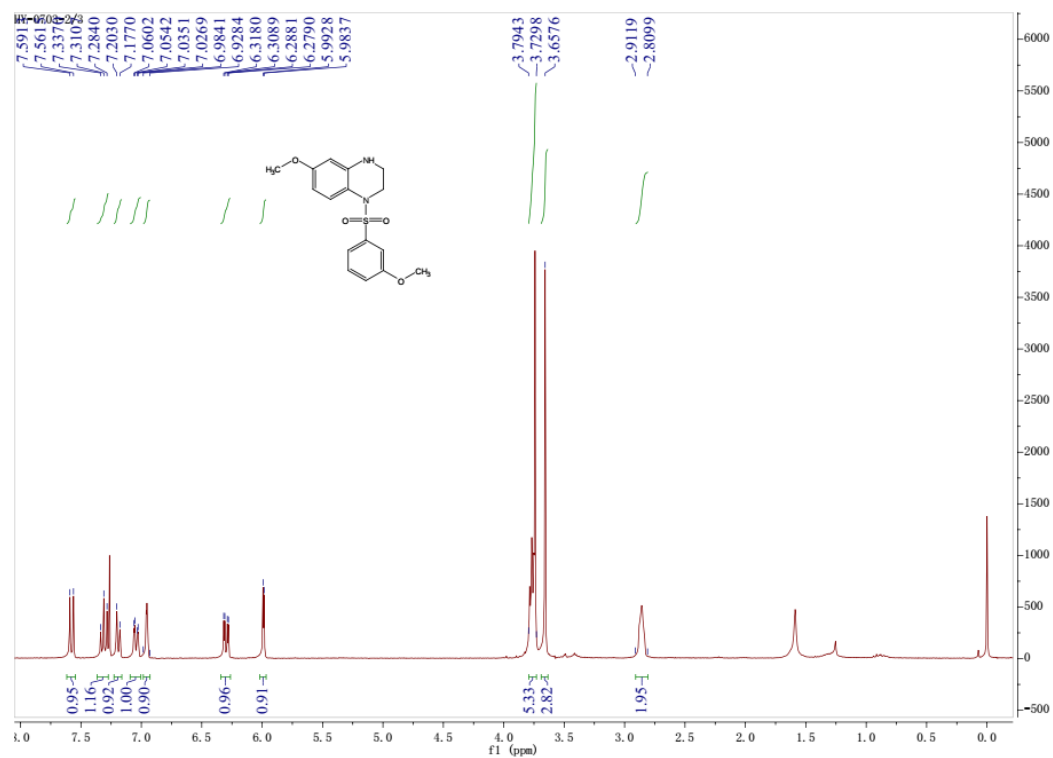

### <sup>13</sup>C-NMR

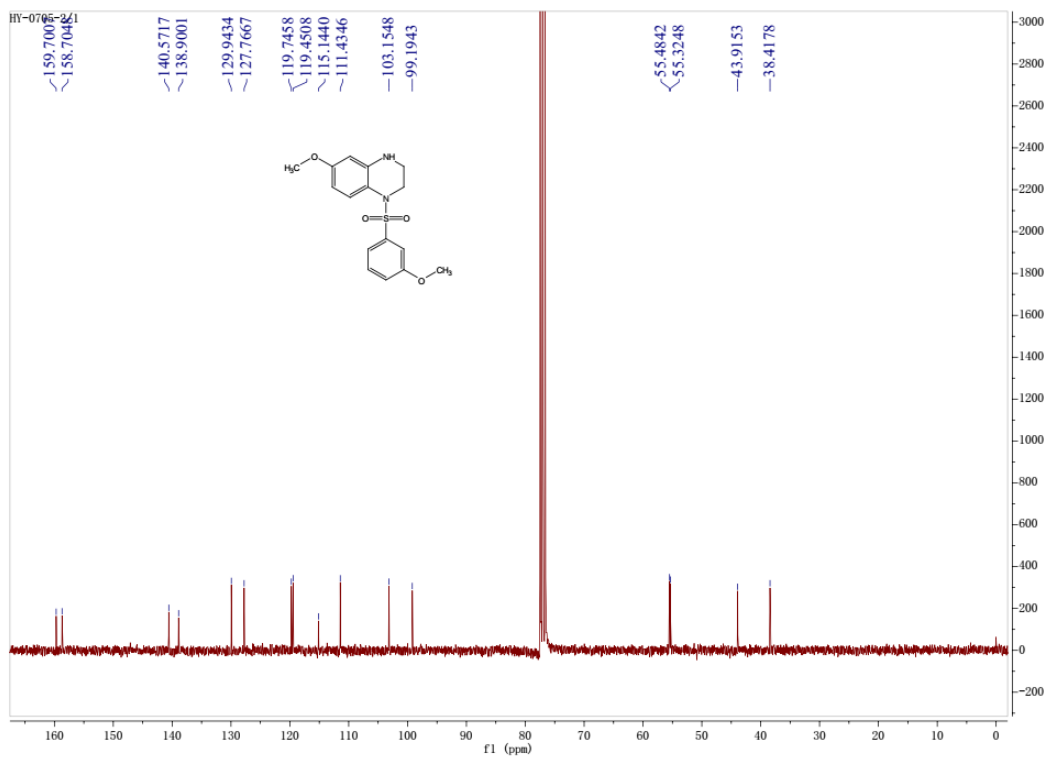

## HRMS

D:\DATA\20221209\I-8

12/09/22 11:06:48

I-8 #21-26 RT: 0.09-0.11 AV: 6 NL: 2.58E9  
T: FTMS + p ESI Full ms [105.0000-1500.0000]

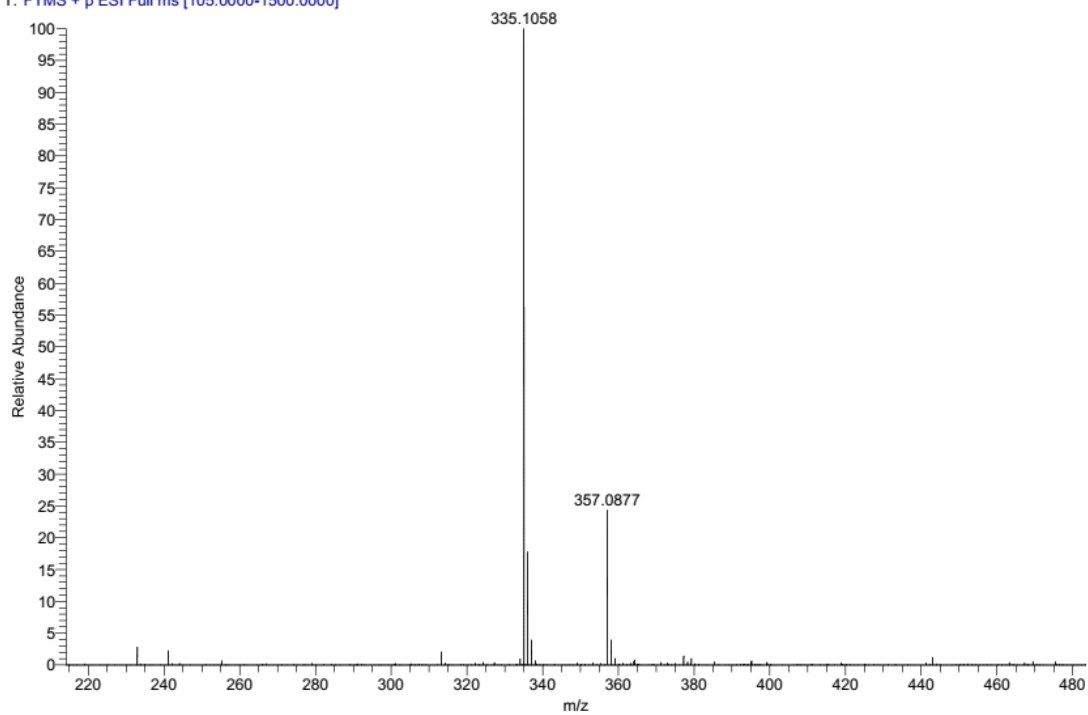

HPLC purity



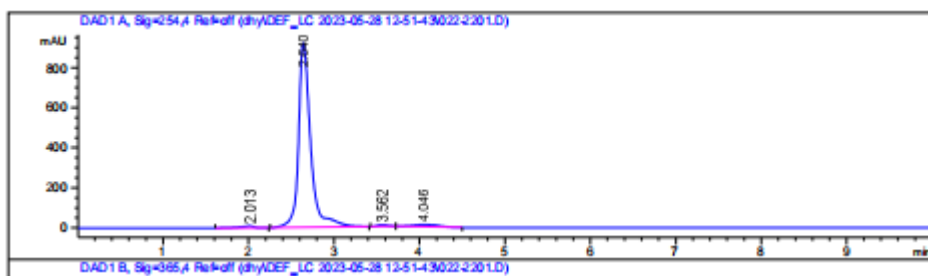

| 峰 # | 保留时间 [min] | 类型 | 峰宽 [min] | 峰面积 [mAU*s] | 峰高 [mAU]  | 峰面积 %   |
|-----|------------|----|----------|-------------|-----------|---------|
| 1   | 2.013      | BB | 0.1475   | 105.52792   | 9.65779   | 1.1173  |
| 2   | 2.640      | BB | 0.1474   | 9068.36719  | 917.02521 | 96.0126 |
| 3   | 3.562      | BB | 0.1293   | 59.13969    | 7.39317   | 0.6261  |
| 4   | 4.046      | BB | 0.2866   | 211.94304   | 10.19221  | 2.2440  |

## I-9

### <sup>1</sup>H-NMR

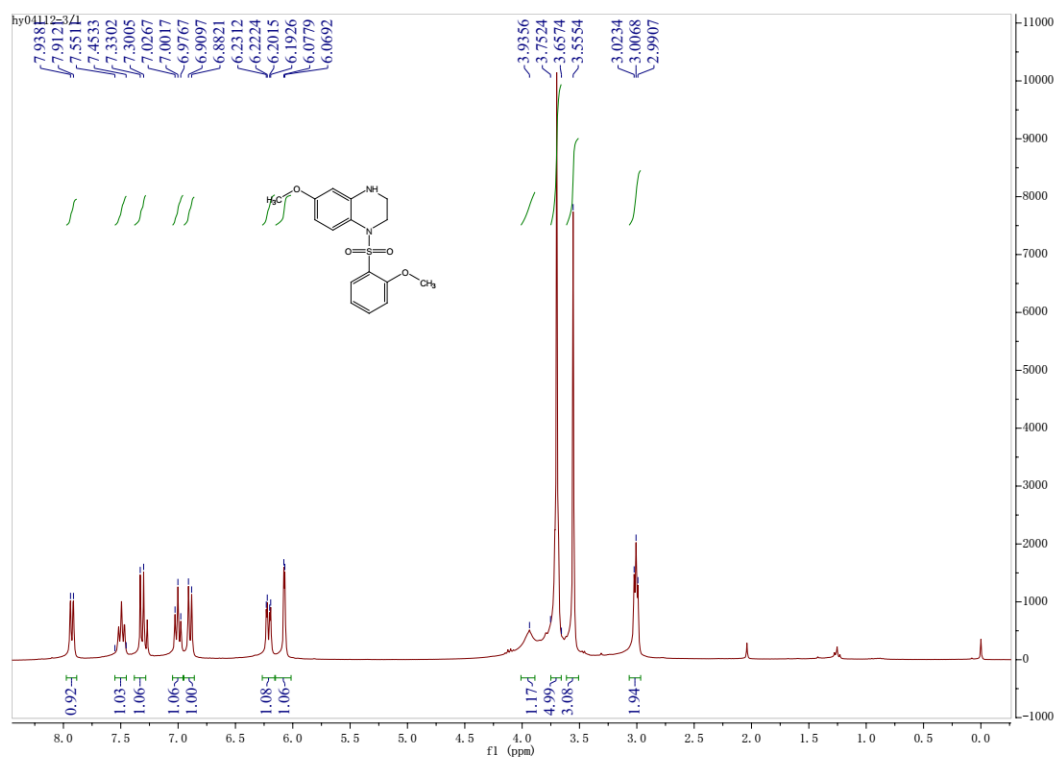

### <sup>13</sup>C-NMR

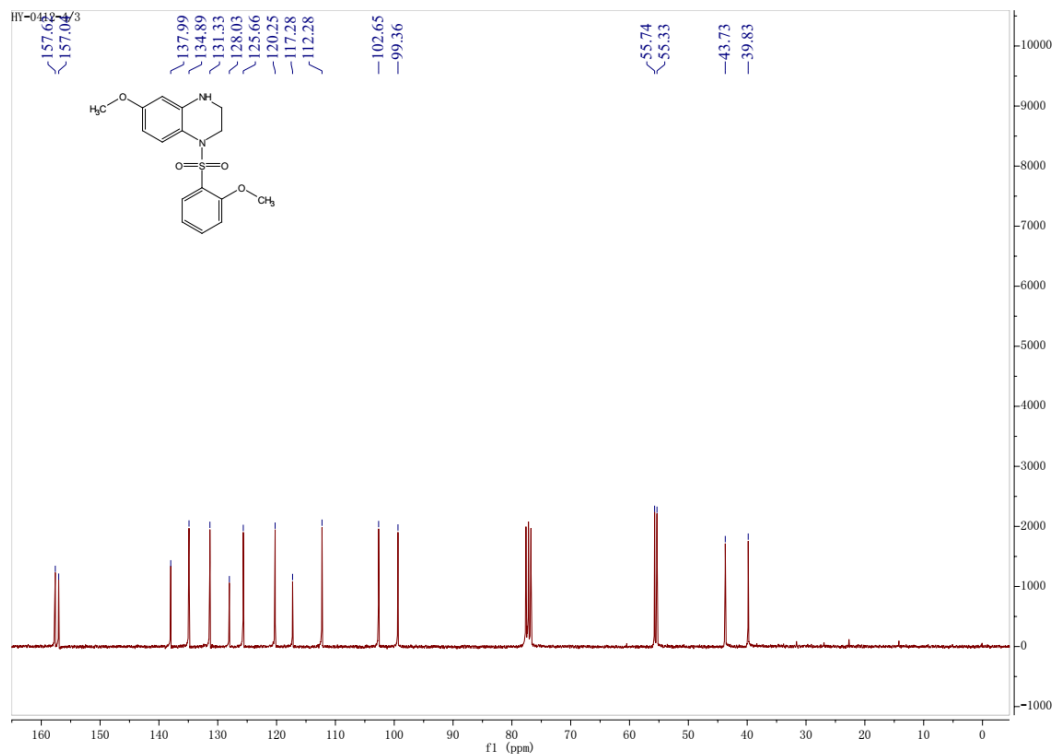

## HRMS

D:\DATA\20221205\1V-9

12/05/22 10:37:20

I-9 #20-26 RT: 0.09-0.11 AV: 7 NL: 3.00E9  
T: FTMS + p ESI Full ms [105.0000-1500.0000]

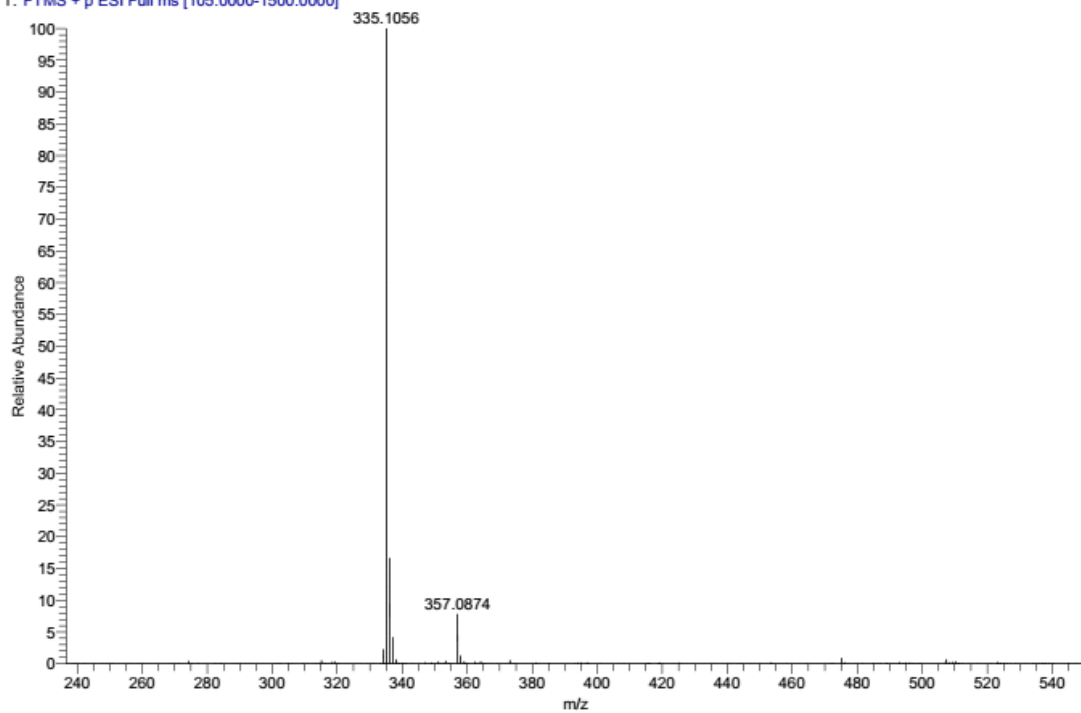

HPLC purity

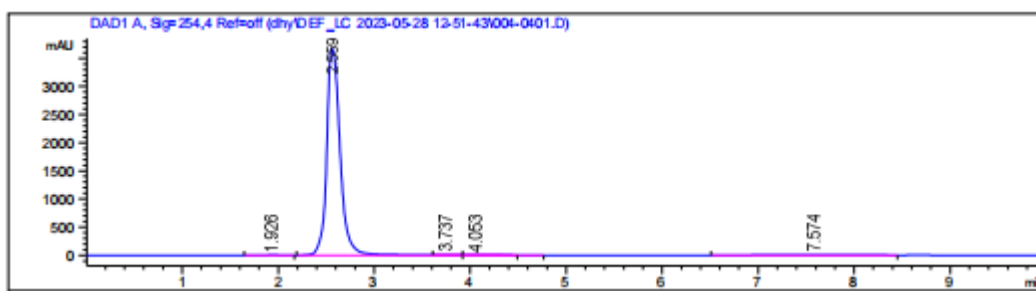

| 峰 # | 保留时间 [min] | 类型   | 峰宽 [min] | 峰面积 [mAU*s] | 峰高 [mAU]   | 峰面积 %   |
|-----|------------|------|----------|-------------|------------|---------|
| 1   | 1.926      | BB   | 0.1216   | 22.68030    | 2.41377    | 0.0627  |
| 2   | 2.559      | BV R | 0.1479   | 3.58819e4   | 3676.13940 | 99.1342 |
| 3   | 3.737      | VV E | 0.1665   | 11.26871    | 1.03966    | 0.0311  |
| 4   | 4.053      | VB E | 0.2211   | 17.82541    | 1.22961    | 0.0492  |
| 5   | 7.574      | BB   | 0.5721   | 261.59573   | 6.46458    | 0.7227  |

## I-10

### <sup>1</sup>H-NMR

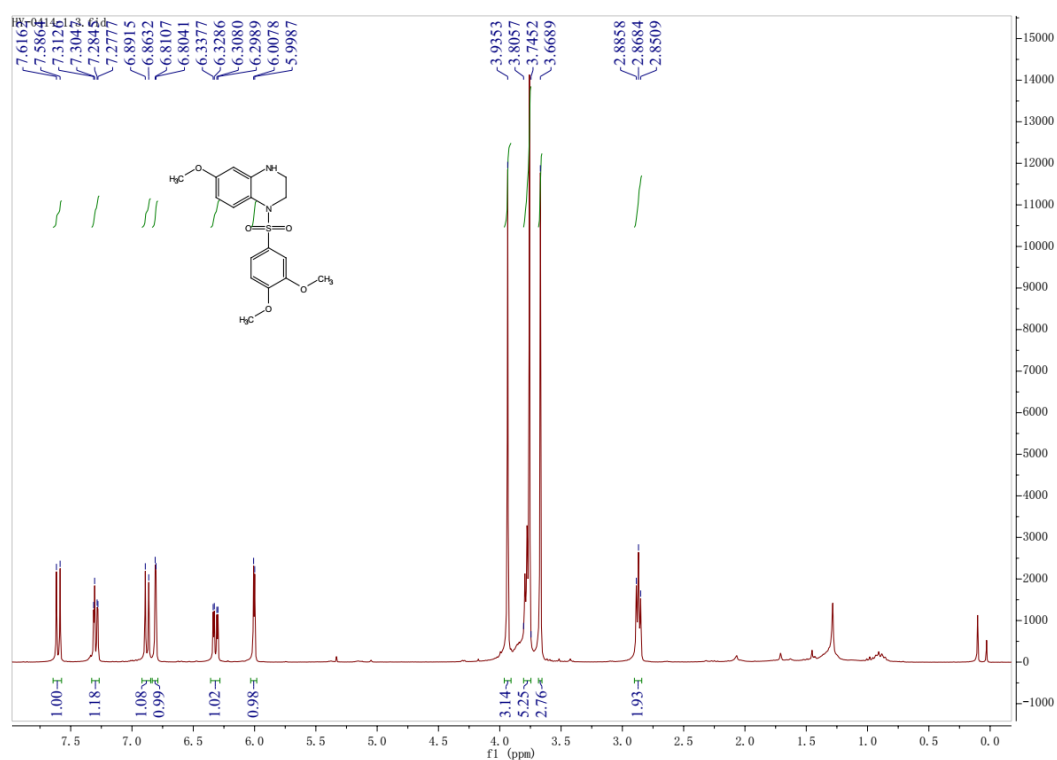

### <sup>13</sup>C-NMR

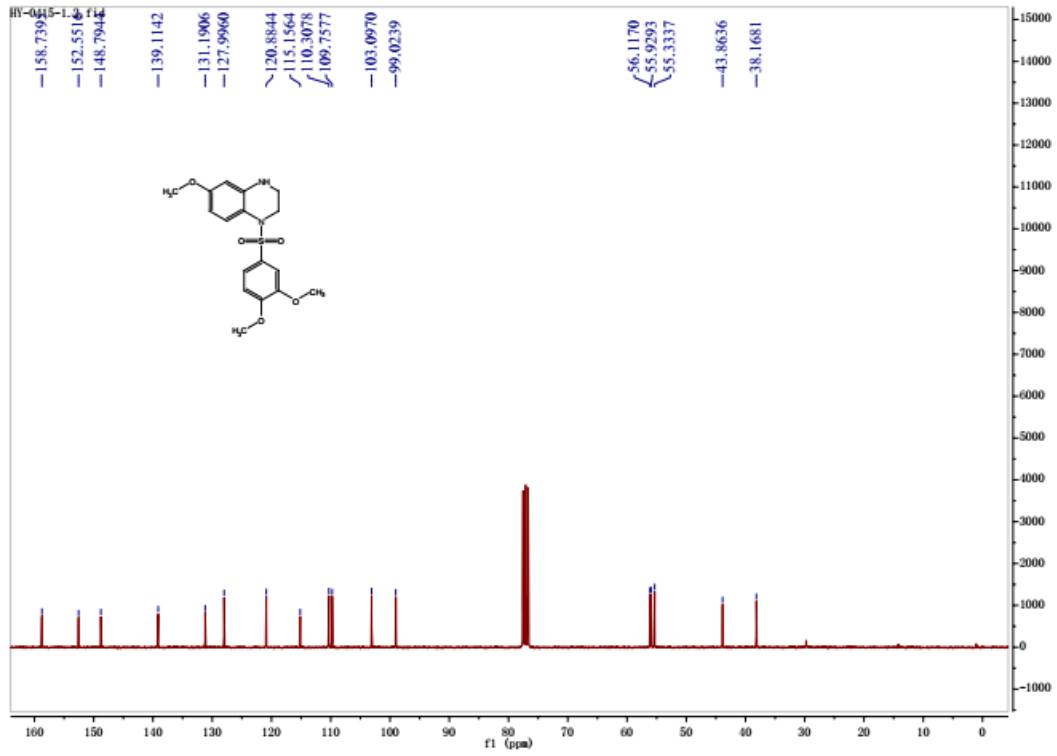

## HRMS

D:\DATA\2022120511W-10

12/05/22 10:39:20

I-10 #20-25 RT: 0.09-0.11 AV: 6 NL: 9.04E8  
T: FTMS + p ESI Full ms [105.0000-1500.0000]

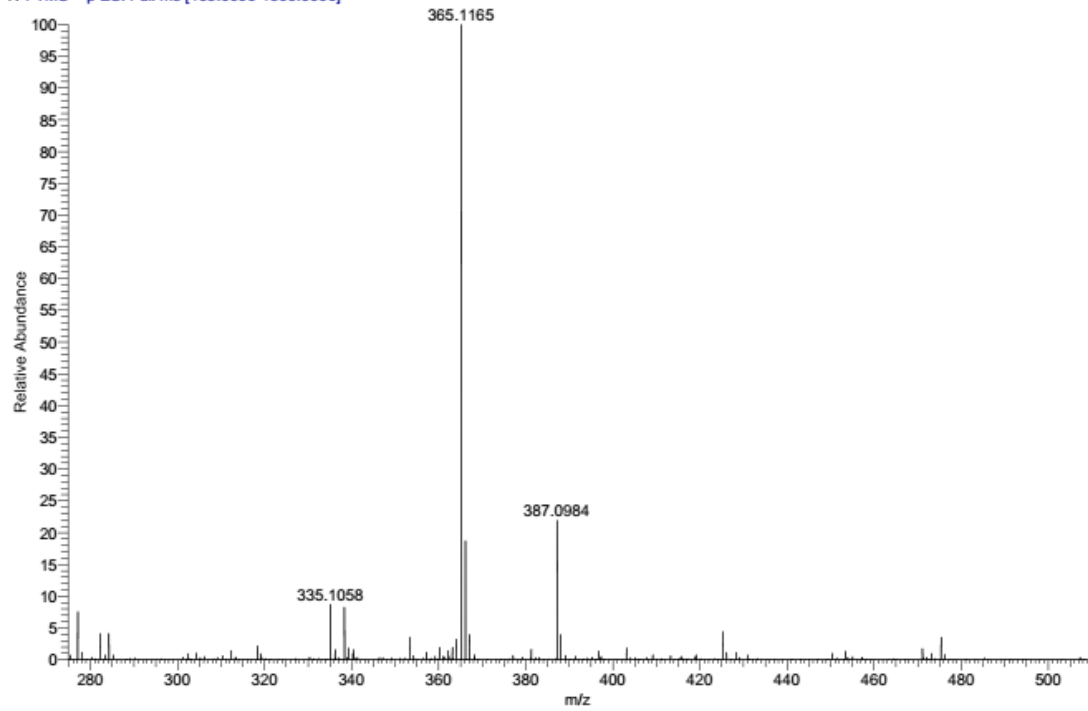

HPLC purity

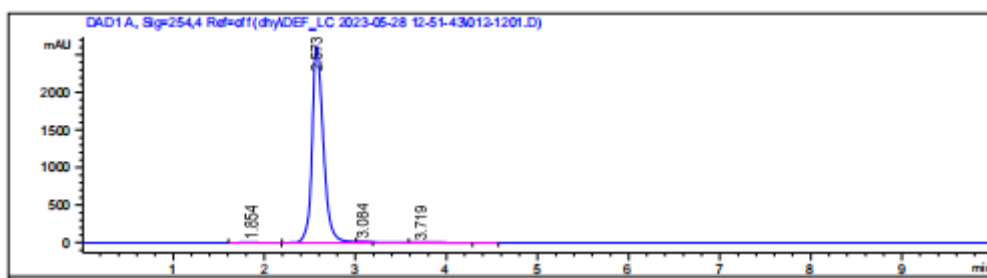

| 峰 # | 保留时间 [min] | 类型   | 峰宽 [min] | 峰面积 [mAU*s] | 峰高 [mAU]   | 峰面积 %   |
|-----|------------|------|----------|-------------|------------|---------|
| 1   | 1.854      | BB   | 0.1914   | 36.57569    | 2.85622    | 0.1595  |
| 2   | 2.573      | BV R | 0.1339   | 2.28176e4   | 2611.97095 | 99.5324 |
| 3   | 3.084      | VV E | 0.1114   | 16.26352    | 2.38963    | 0.0709  |
| 4   | 3.719      | VB E | 0.2224   | 54.36494    | 4.10914    | 0.2371  |

## I-11

### <sup>1</sup>H-NMR

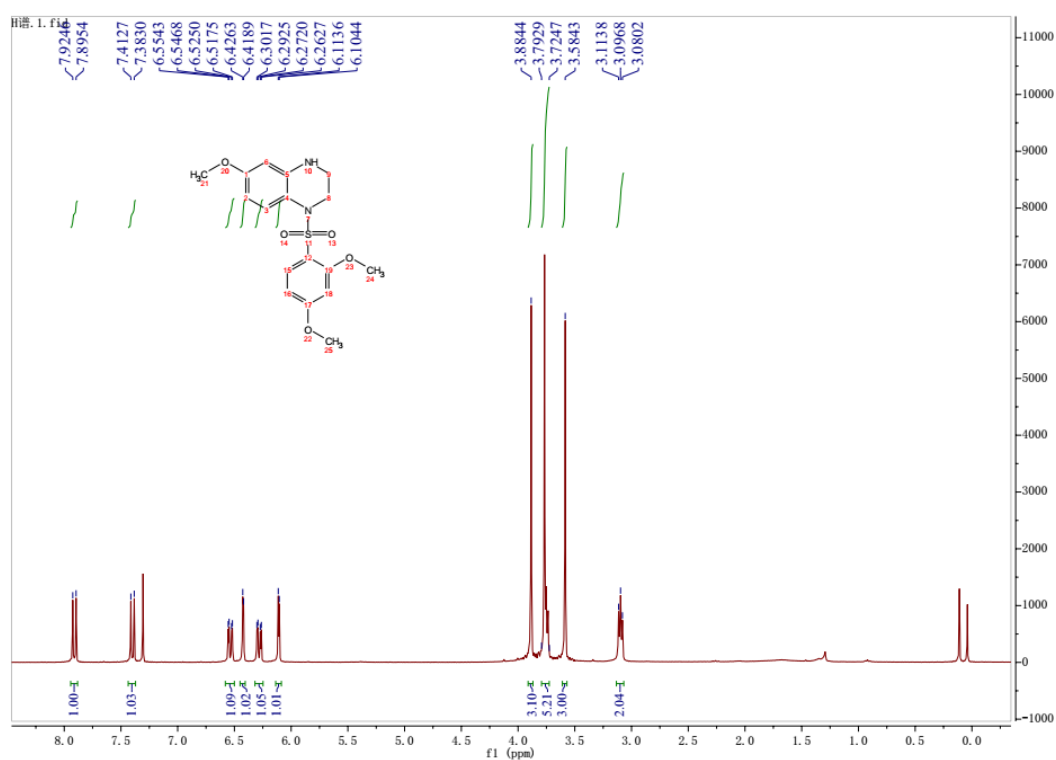

### <sup>13</sup>C-NMR

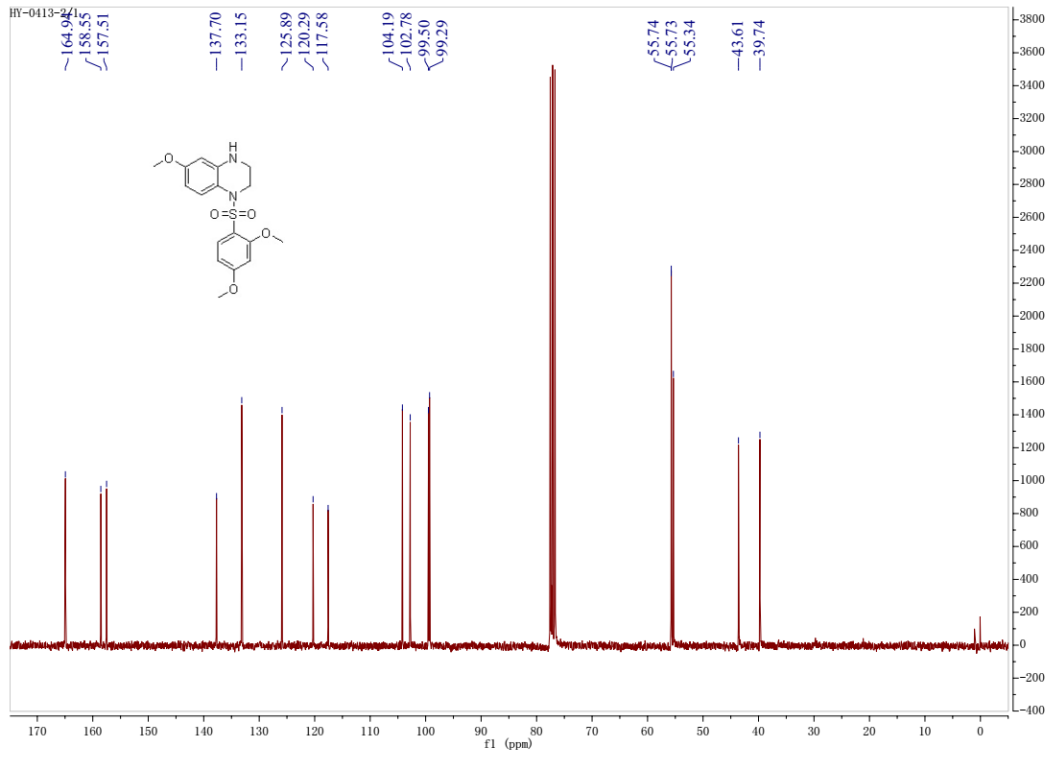

## HRMS

D:\DATA\2022120511\11

12/05/22 10:41:21

I-11 #24-29 RT: 0.11-0.13 AV: 6 NL: 1.86E9  
T: FTMS + p ESI Full ms [105.0000-1500.0000]

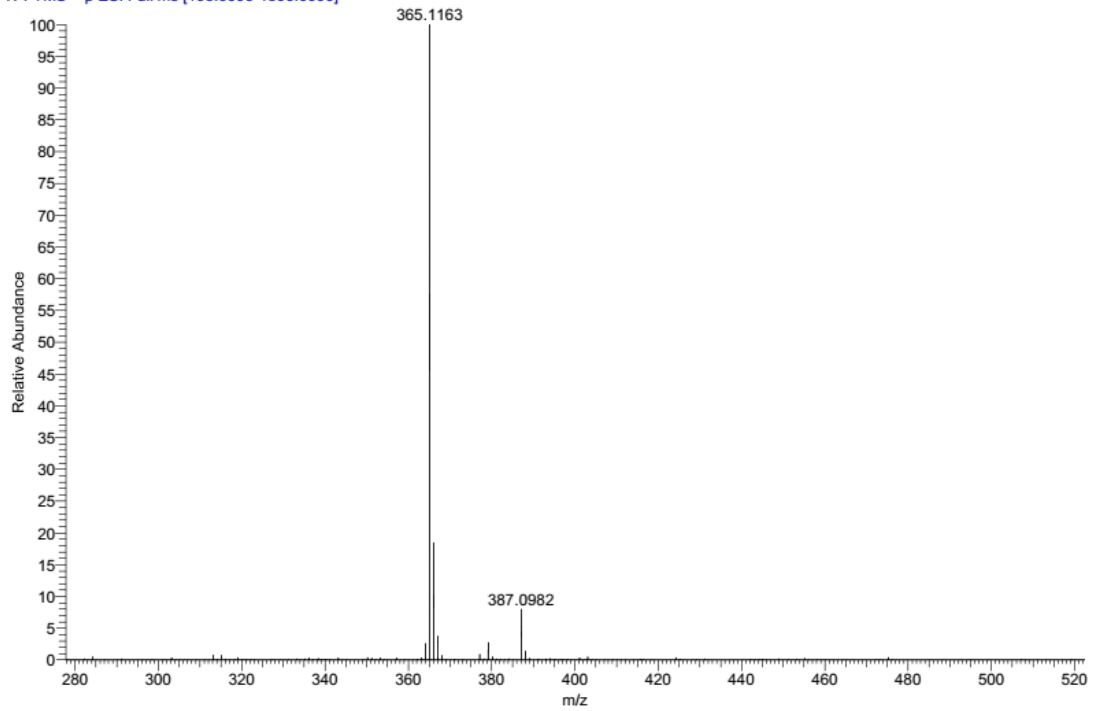

HPLC purity

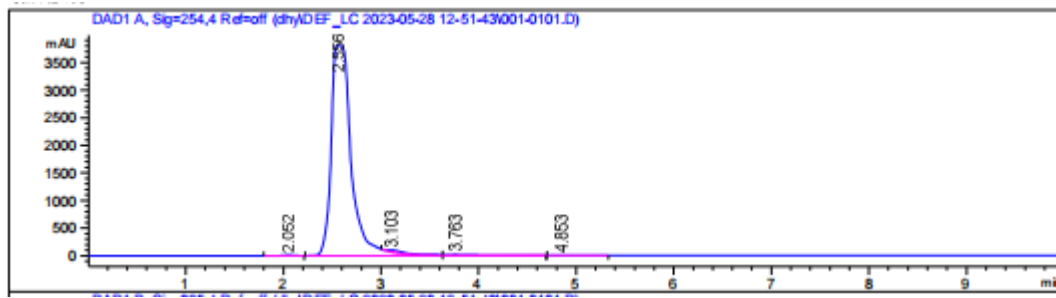

| 峰 # | 保留时间 [min] | 类型   | 峰宽 [min] | 峰面积 [mAU*s] | 峰高 [mAU]   | 峰面积 %   |
|-----|------------|------|----------|-------------|------------|---------|
| 1   | 2.052      | BB   | 0.0852   | 76.75024    | 14.16857   | 0.1382  |
| 2   | 2.556      | BV R | 0.2192   | 5.45632e4   | 3806.43188 | 98.2834 |
| 3   | 3.103      | VV E | 0.2362   | 569.95819   | 33.55543   | 1.0267  |
| 4   | 3.763      | VB E | 0.3305   | 292.19229   | 12.33008   | 0.5263  |
| 5   | 4.853      | BB   | 0.2045   | 14.08991    | 1.05013    | 0.0254  |

## I-12

### <sup>1</sup>H-NMR

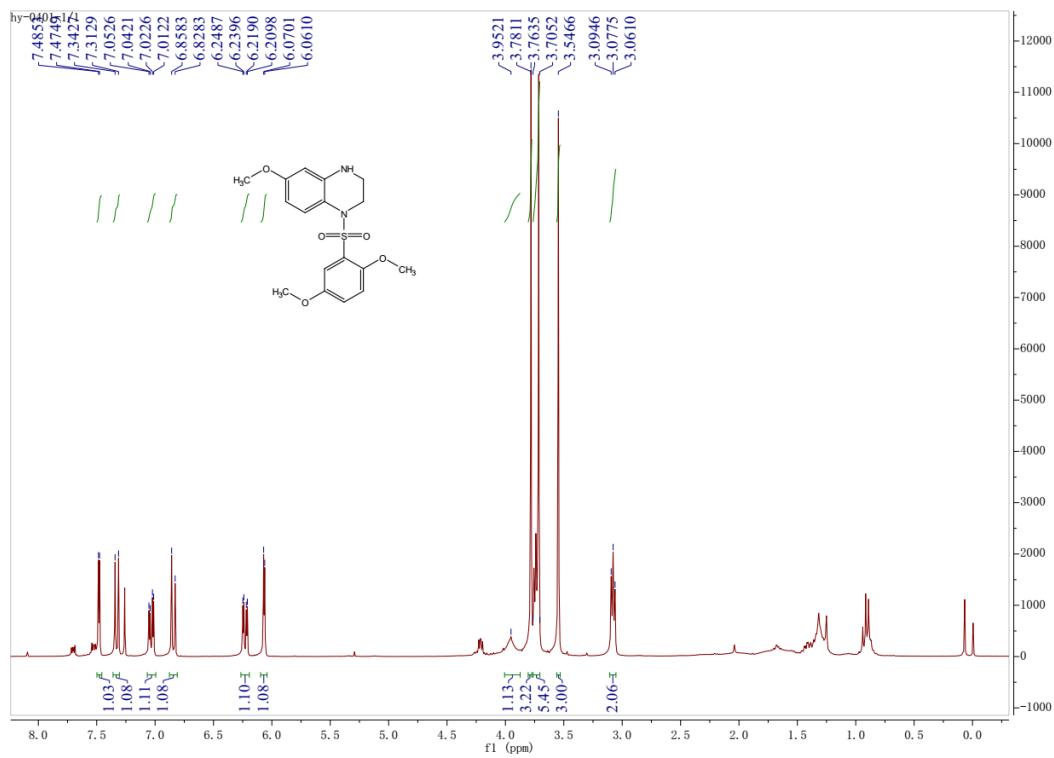

### <sup>13</sup>C-NMR

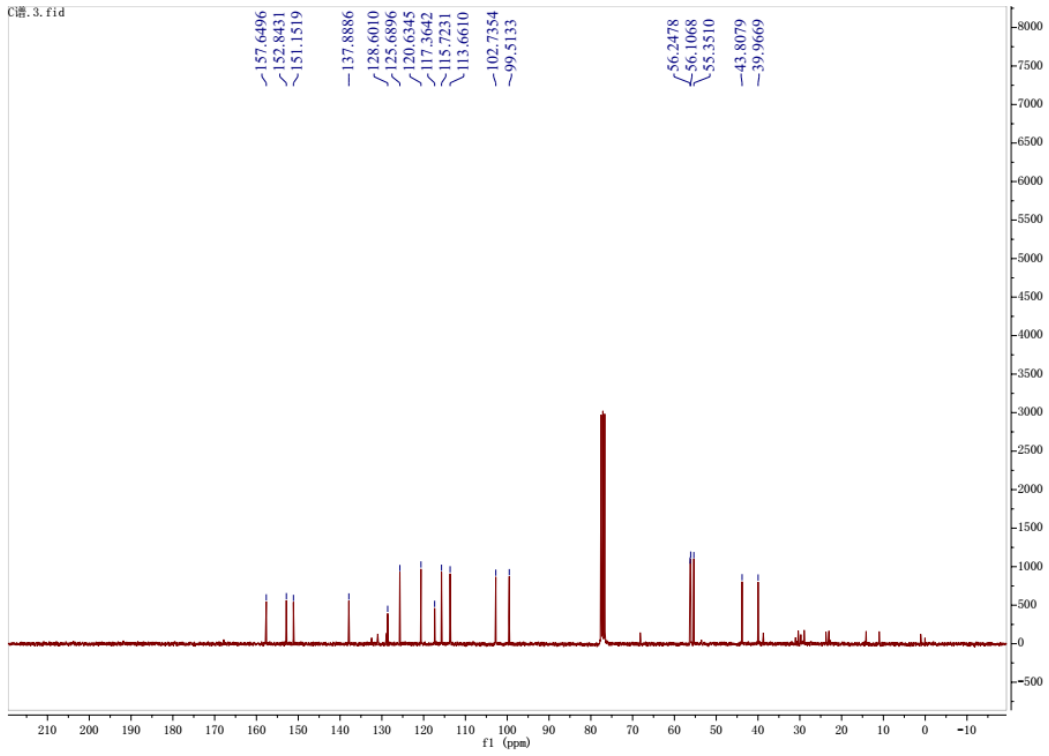

## HRMS

D:\DATA\2022120511\12

12/05/22 10:43:22

12 #21-26 RT: 0.09-0.11 AV: 6 NL: 1.04E9  
T: FTMS + p ESI Full ms [105.0000-1500.0000]

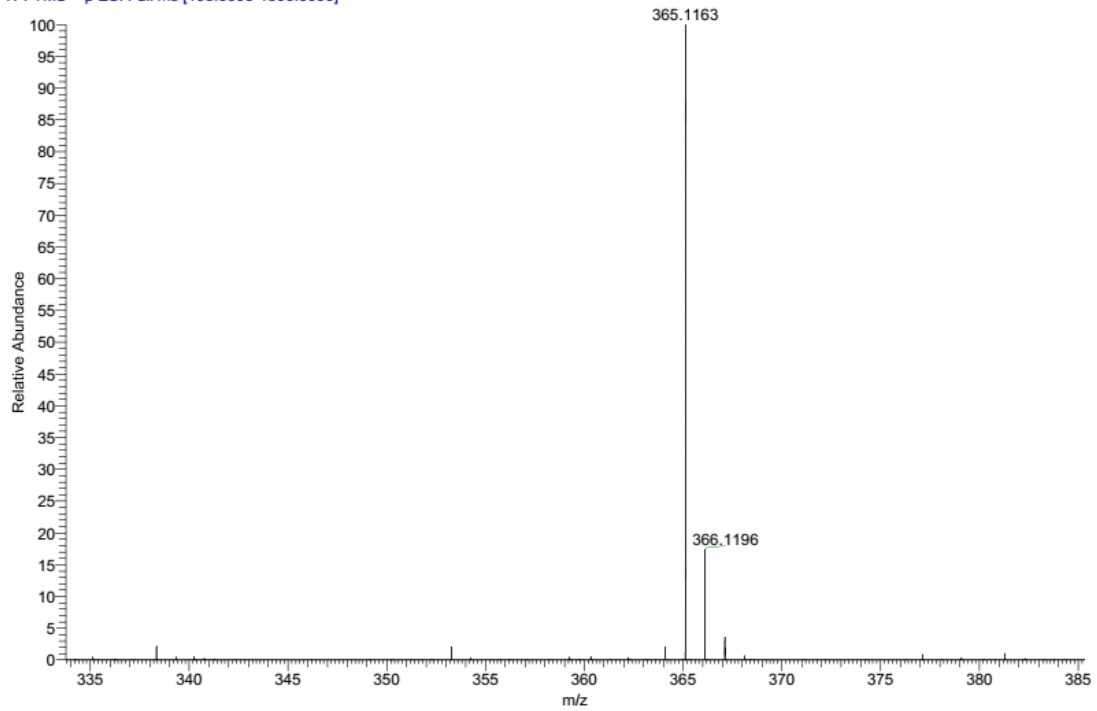

HPLC purity



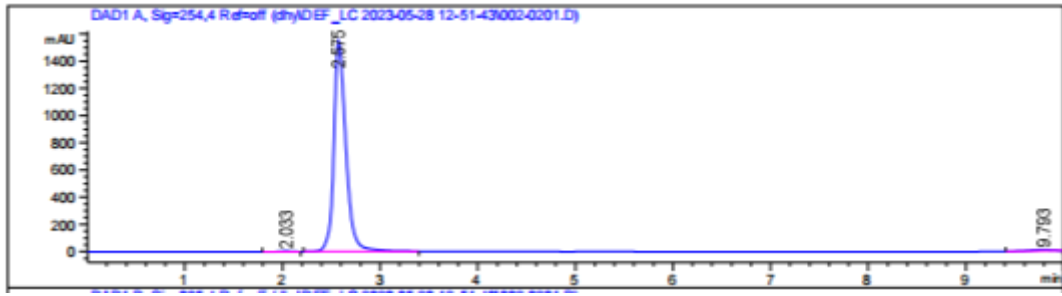

| 峰 # | 保留时间 [min] | 类型  | 峰宽 [min] | 峰面积 [mAU*s] | 峰高 [mAU]   | 峰面积 %   |
|-----|------------|-----|----------|-------------|------------|---------|
| 1   | 2.033      | BB  | 0.0937   | 29.02226    | 4.86083    | 0.2150  |
| 2   | 2.575      | BB  | 0.1327   | 1.33359e4   | 1544.44434 | 98.7769 |
| 3   | 9.793      | BBA | 0.2642   | 136.10683   | 8.43682    | 1.0081  |

### I-13

#### <sup>1</sup>H-NMR

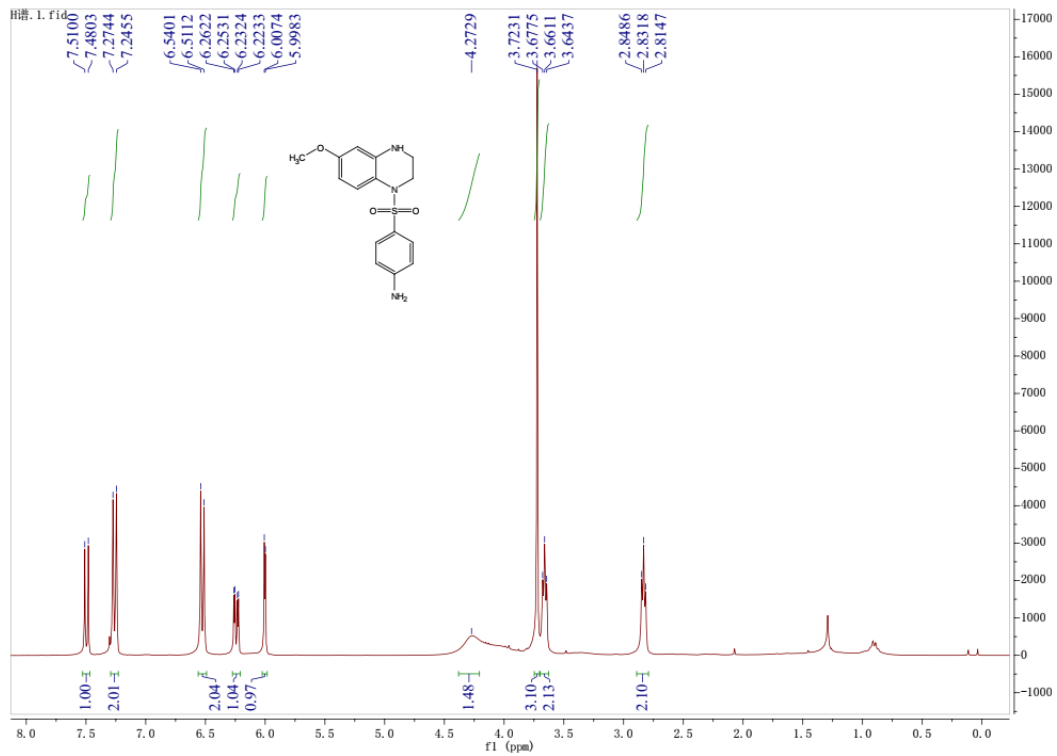

#### <sup>13</sup>C-NMR

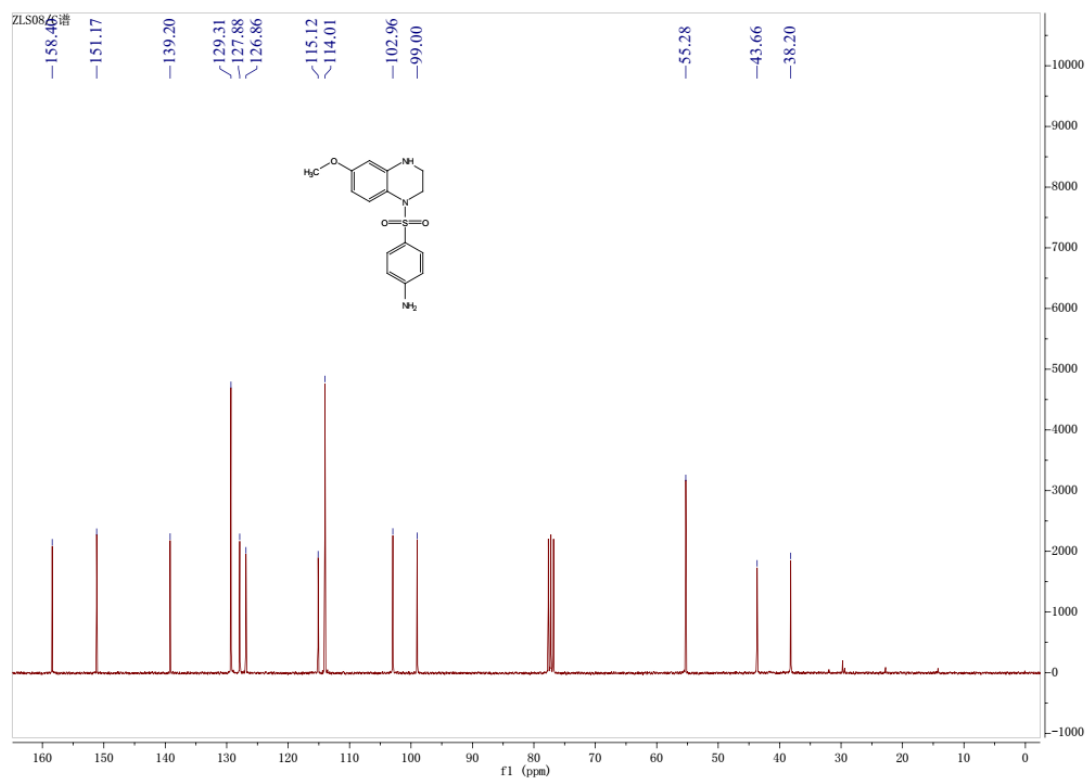

## HRMS

D:\DATA\20221205\11-13

12/05/22 10:45:23

I-13 #22-28 RT: 0.10-0.12 AV: 7 NL: 1.46E9  
T: FTMS + p ESI Full ms [105.0000-1500.0000]

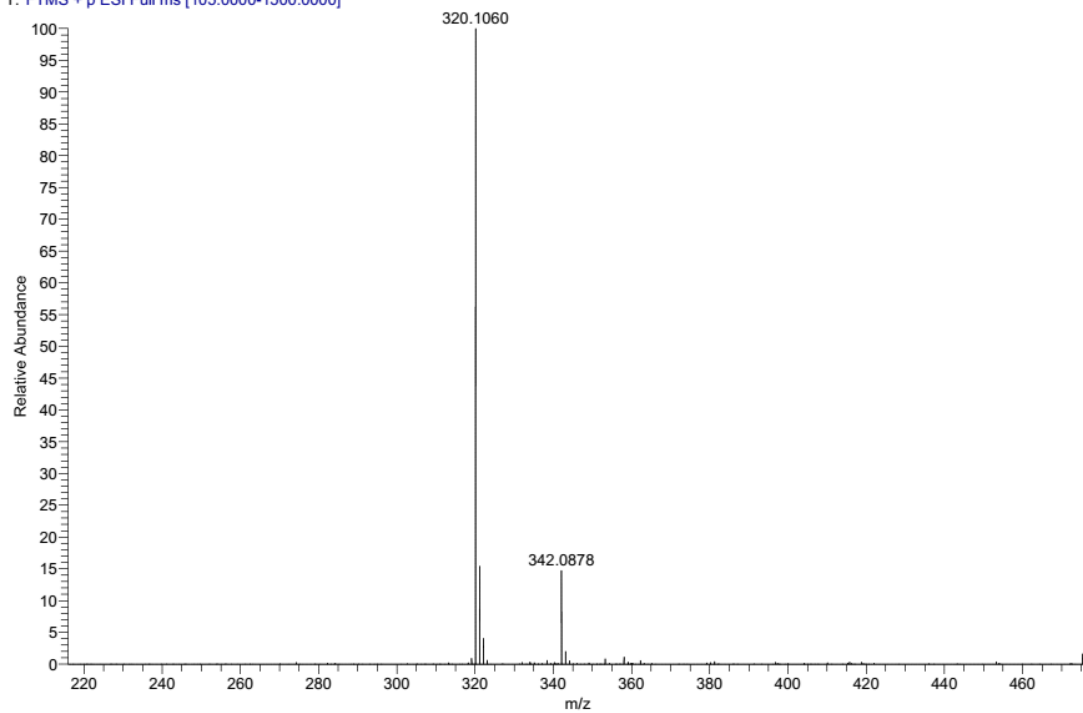

HPLC purity

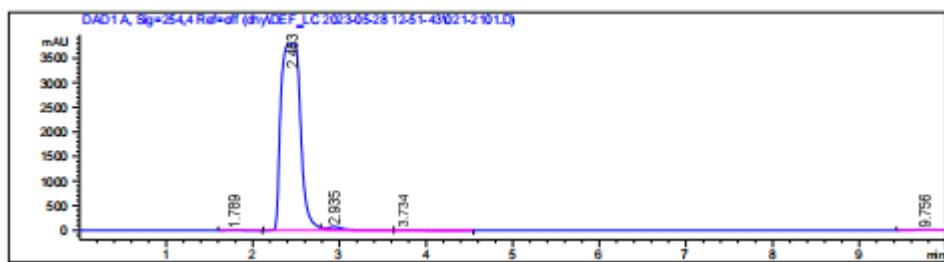

| 峰 # | 保留时间 [min] | 类型   | 峰宽 [min] | 峰面积 [mAU*s] | 峰高 [mAU]   | 峰面积 %   |
|-----|------------|------|----------|-------------|------------|---------|
| 1   | 1.789      | BB   | 0.1867   | 48.39608    | 4.07015    | 0.0807  |
| 2   | 2.463      | BV R | 0.2113   | 5.89000e4   | 3790.66577 | 98.2586 |
| 3   | 2.935      | VV E | 0.1764   | 774.58685   | 64.37450   | 1.2922  |
| 4   | 3.734      | VB E | 0.2675   | 58.44681    | 3.02431    | 0.0975  |
| 5   | 9.756      | BBA  | 0.2653   | 162.43475   | 9.80127    | 0.2710  |

## I-14

### <sup>1</sup>H-NMR

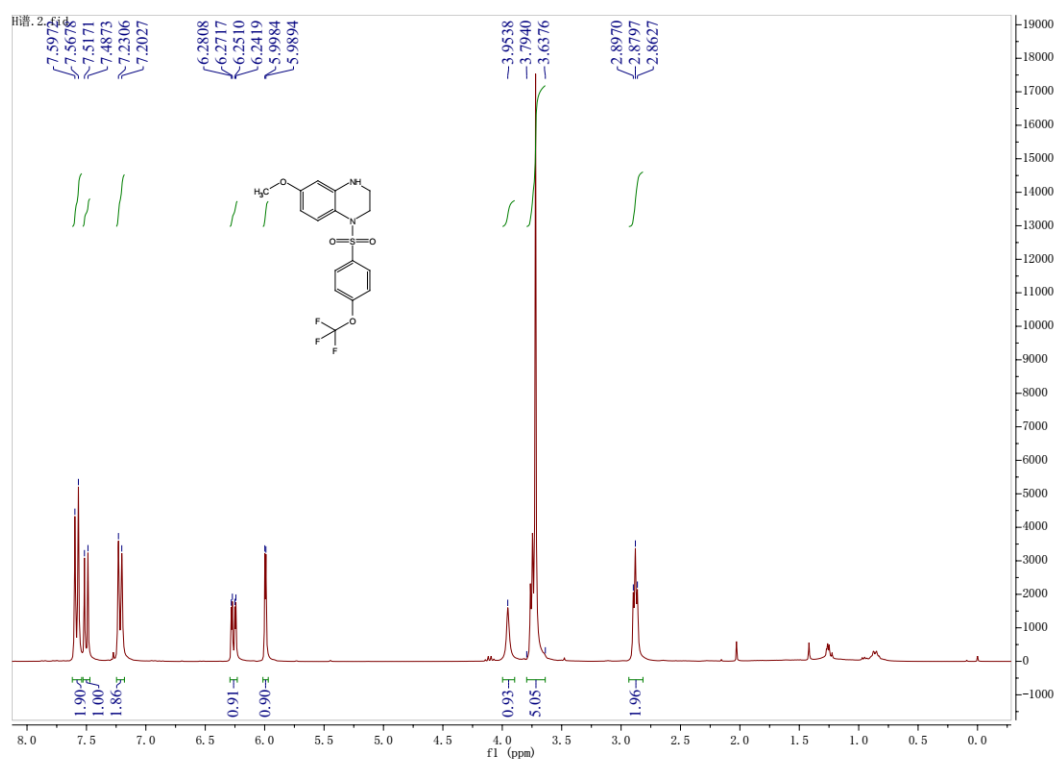

### <sup>13</sup>C-NMR

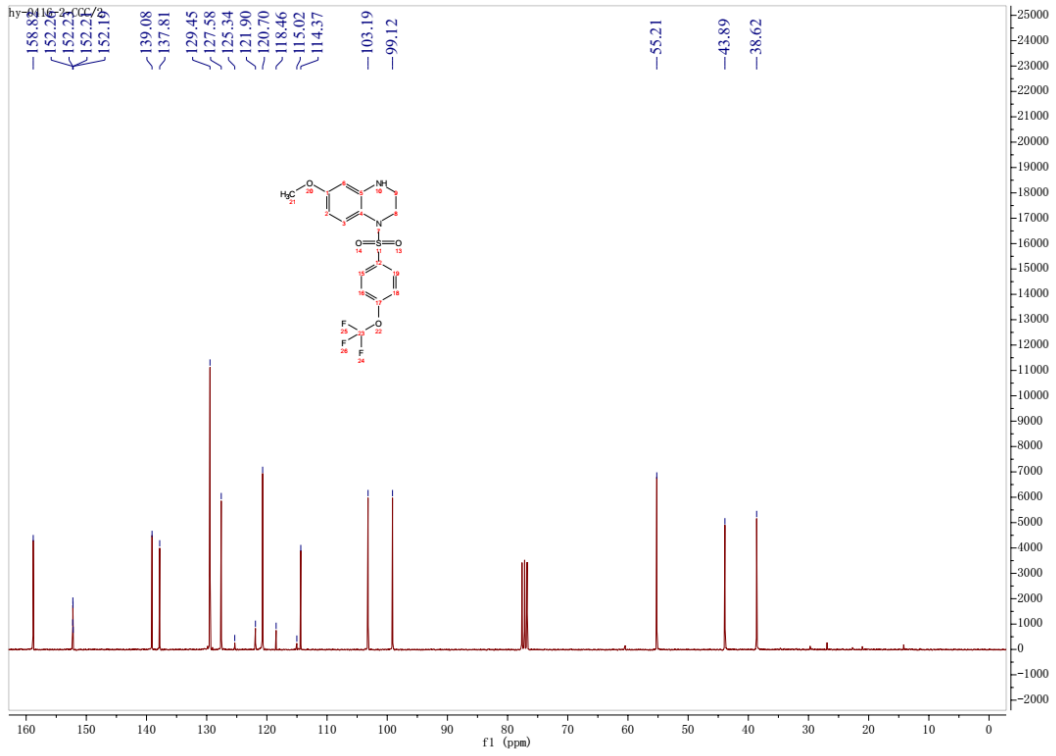

## HRMS

D:\DATA\20221205\11\14

12/05/22 10:47:24

I-14 #29-31 RT: 0.13-0.14 AV: 3 NL: 2.99E9  
T: FTMS + p ESI Full ms [105.0000-1500.0000]

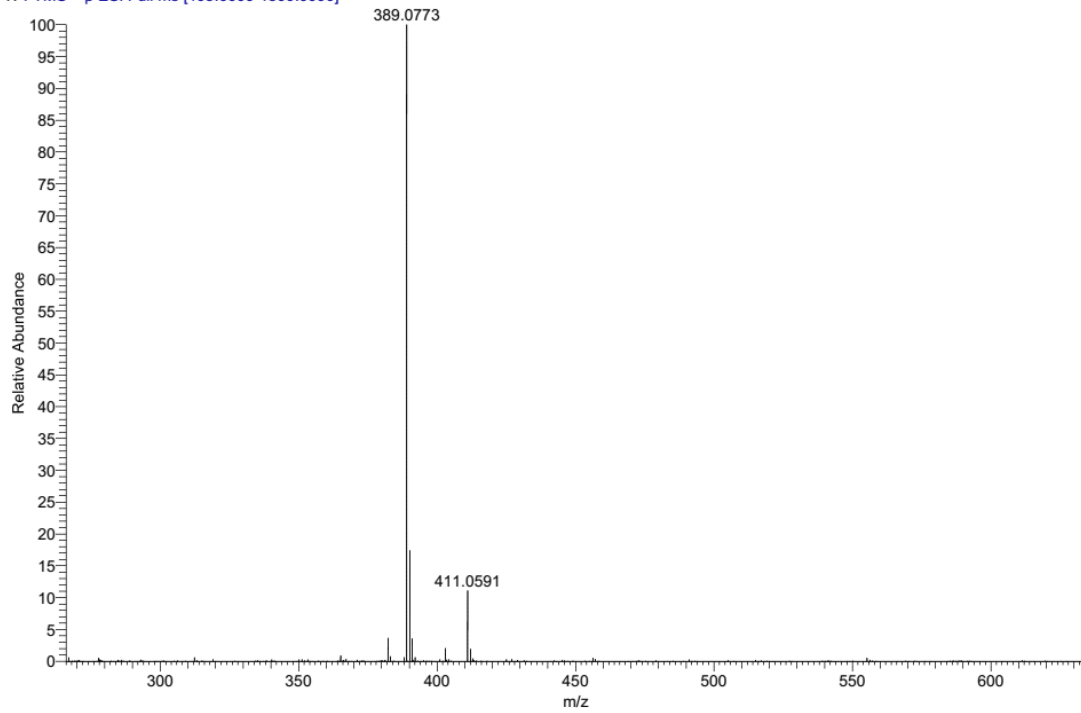

HPLC purity

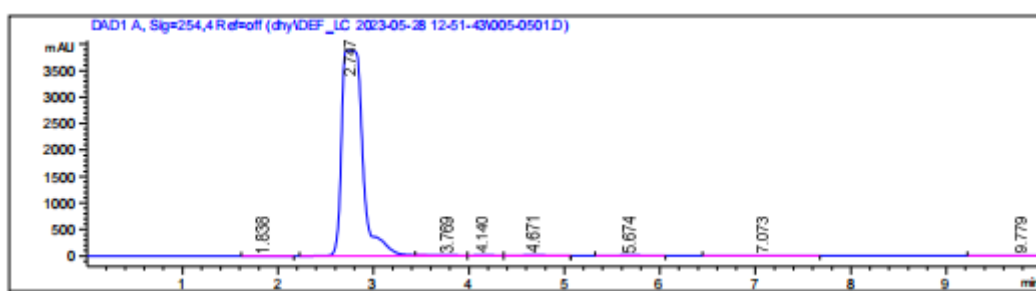

| 峰 # | 保留时间 [min] | 类型   | 峰宽 [min] | 峰面积 [mAU*s] | 峰高 [mAU]   | 峰面积 %   |
|-----|------------|------|----------|-------------|------------|---------|
| 1   | 1.838      | BB   | 0.1374   | 17.07867    | 1.66925    | 0.0282  |
| 2   | 2.747      | BV R | 0.2072   | 5.95669e4   | 3877.42114 | 98.4780 |
| 3   | 3.769      | VV E | 0.2367   | 153.20473   | 9.17975    | 0.2533  |
| 4   | 4.140      | VV E | 0.2187   | 171.62225   | 11.73210   | 0.2837  |
| 5   | 4.671      | VB E | 0.2509   | 213.46021   | 12.39488   | 0.3529  |
| 6   | 5.674      | BB   | 0.2782   | 169.04475   | 9.20682    | 0.2795  |
| 7   | 7.073      | BB   | 0.4226   | 159.88232   | 4.95259    | 0.2643  |
| 8   | 9.779      | BBA  | 0.3884   | 36.34280    | 1.55939    | 0.0601  |

## I-15

### <sup>1</sup>H-NMR

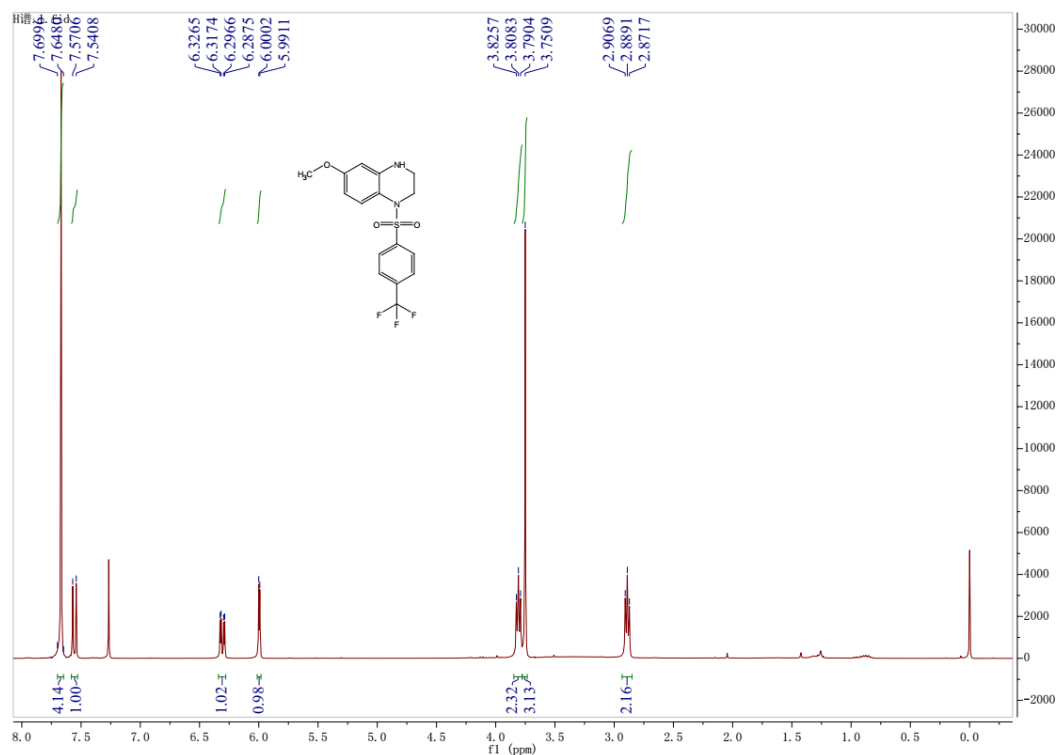

### <sup>13</sup>C-NMR

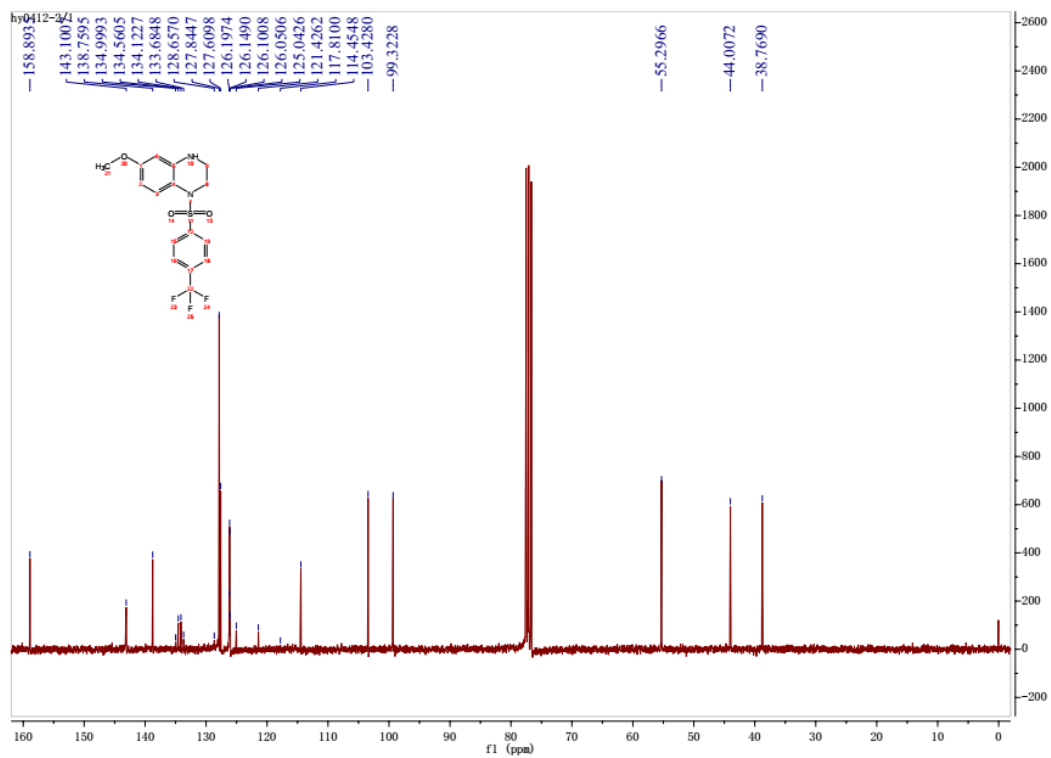

## HRMS

D:\DATA\20221205\1W-15

12/05/22 10:49:24

I-15 #20-27 RT: 0.09-0.12 AV: 8 NL: 4.08E9  
T: FTMS + p ESI Full ms [105.0000-1500.0000]

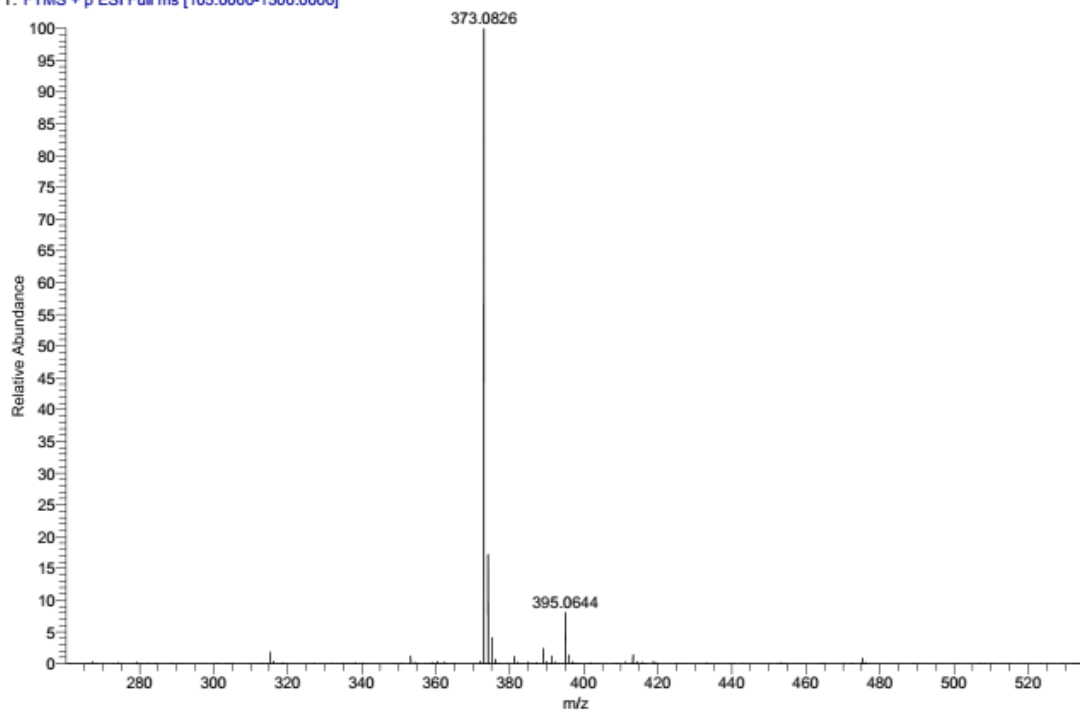

HPLC purity

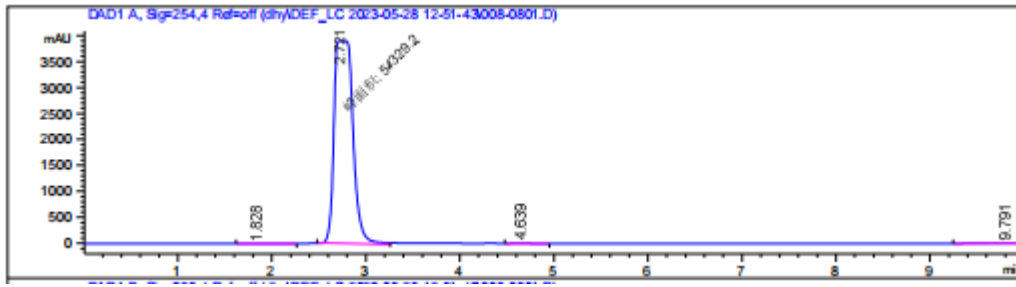

| 峰 # | 保留时间 [min] | 类型  | 峰宽 [min] | 峰面积 [mAU*s] | 峰高 [mAU]   | 峰面积 %   |
|-----|------------|-----|----------|-------------|------------|---------|
| 1   | 1.828      | BB  | 0.1409   | 10.76635    | 1.02194    | 0.0198  |
| 2   | 2.721      | MM  | 0.2324   | 5.43292e4   | 3895.61279 | 99.7702 |
| 3   | 4.639      | BB  | 0.1927   | 14.37638    | 1.20912    | 0.0264  |
| 4   | 9.791      | BBA | 0.3545   | 100.01393   | 4.58464    | 0.1837  |

## I-16

### <sup>1</sup>H-NMR

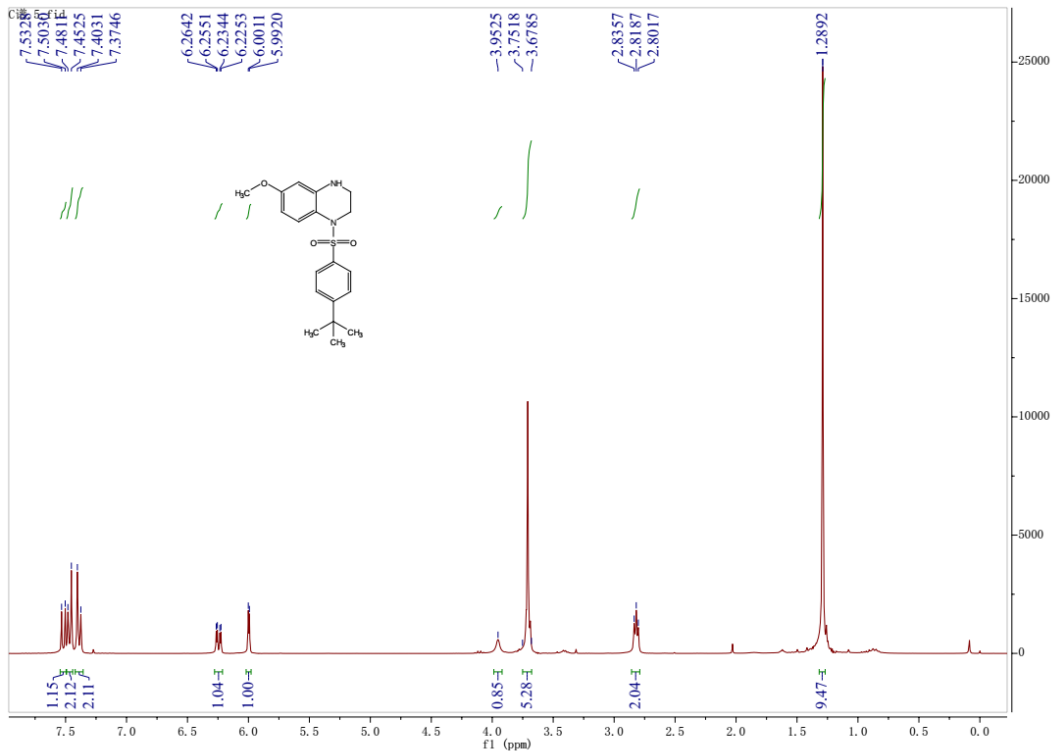

### <sup>13</sup>C-NMR

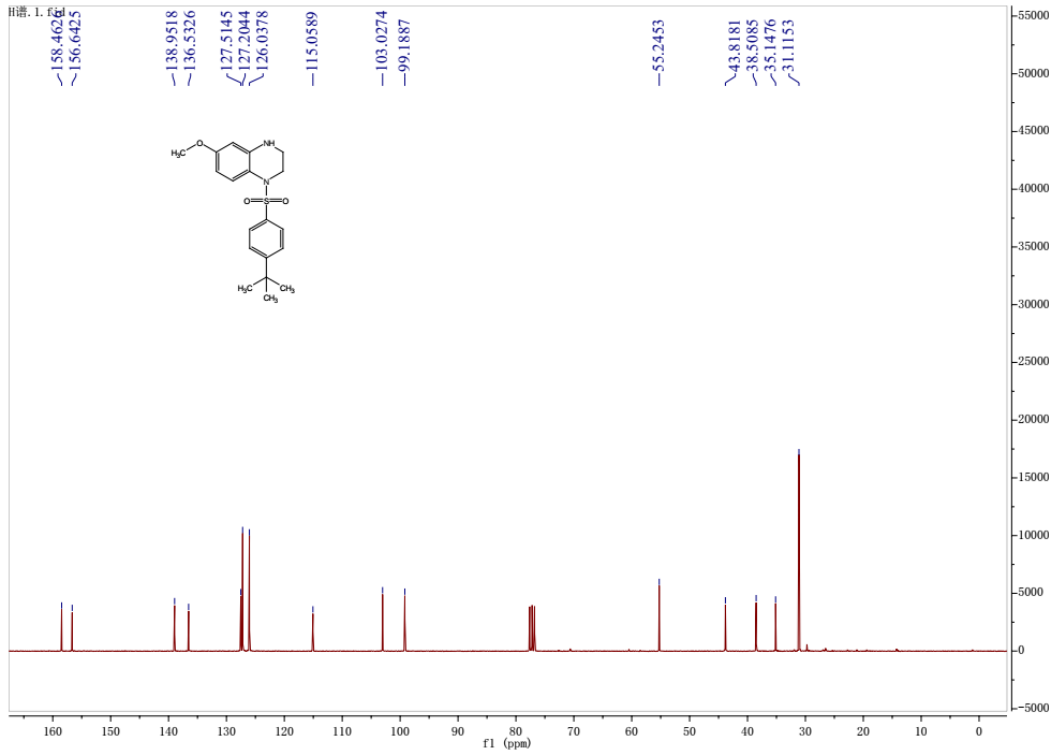

## HRMS

D:\DATA\20221205\11\1-16

12/05/22 10:51:23

I-16 #23-28 RT: 0.10-0.12 AV: 6 NL: 3.35E9  
T: FTMS + p ESI Full ms [105.0000-1500.0000]

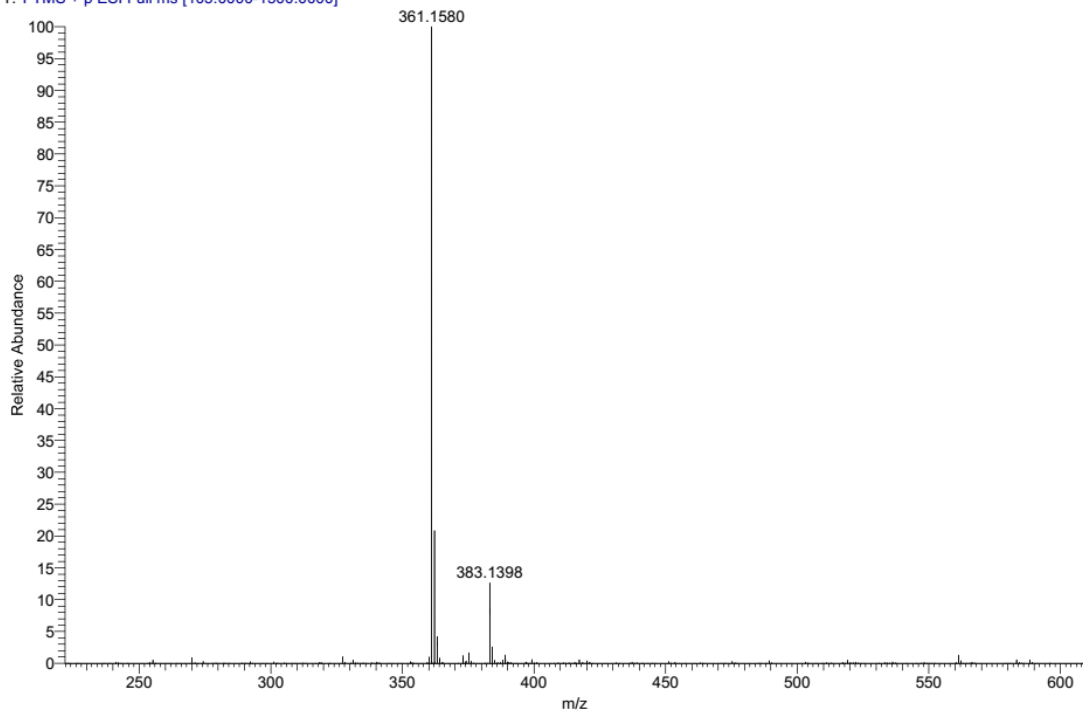

HPLC purity



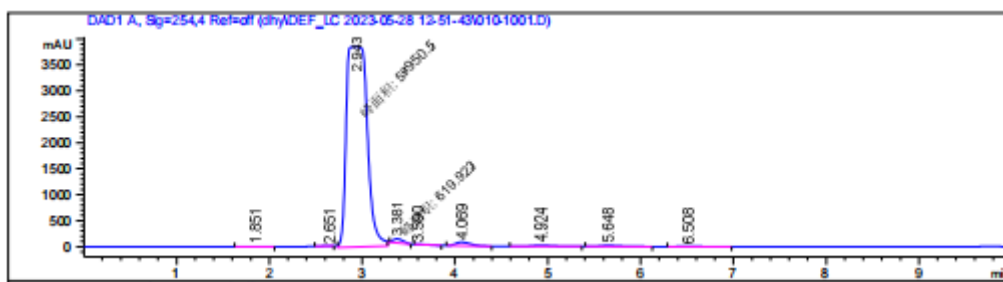

| 峰 # | 保留时间 [min] | 类型 | 峰宽 [min] | 峰面积 [mAU*s] | 峰高 [mAU]   | 峰面积 %   |
|-----|------------|----|----------|-------------|------------|---------|
| 1   | 1.851      | BB | 0.1228   | 16.64512    | 1.81829    | 0.0268  |
| 2   | 2.651      | BB | 0.1178   | 25.18689    | 2.88542    | 0.0406  |
| 3   | 2.943      | MM | 0.2589   | 5.99505e4   | 3858.75757 | 96.6797 |
| 4   | 3.381      | MM | 0.1300   | 619.92285   | 79.47868   | 0.9997  |
| 5   | 3.590      | BB | 0.1930   | 40.83002    | 2.75287    | 0.0658  |
| 6   | 4.069      | BB | 0.1751   | 767.74139   | 69.35452   | 1.2381  |
| 7   | 4.924      | BB | 0.2341   | 303.18176   | 19.64463   | 0.4889  |
| 8   | 5.648      | BB | 0.2289   | 267.14728   | 18.24235   | 0.4308  |

## I-17

### <sup>1</sup>H-NMR

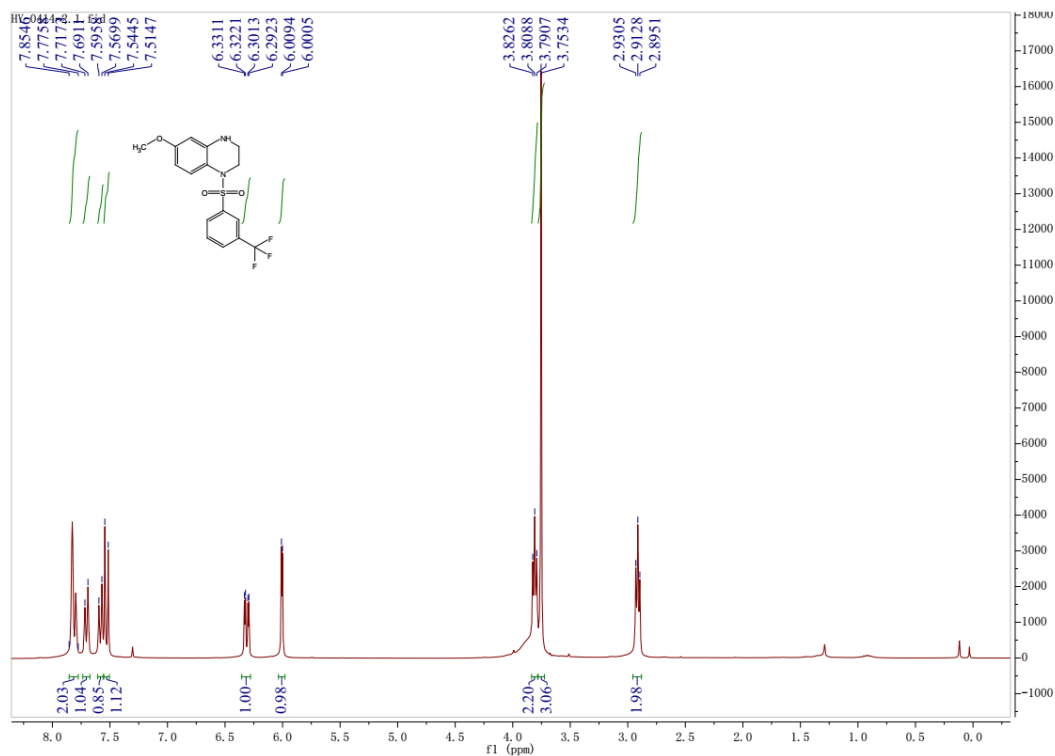

### <sup>13</sup>C-NMR

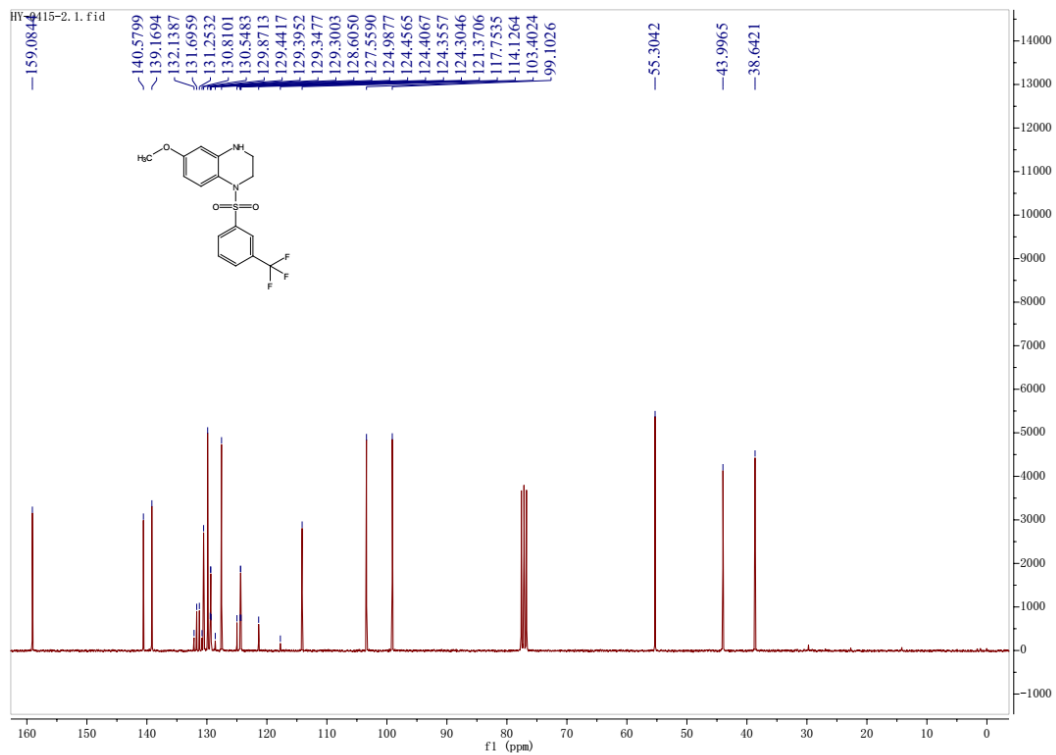

## HRMS

D:\DATA\20221205\1\1-17

12/05/22 10:53:24

I-17 #22-29 RT: 0.10-0.13 AV: 8 NL: 4.06E9  
T: FTMS + p ESI Full ms [105.0000-1500.0000]

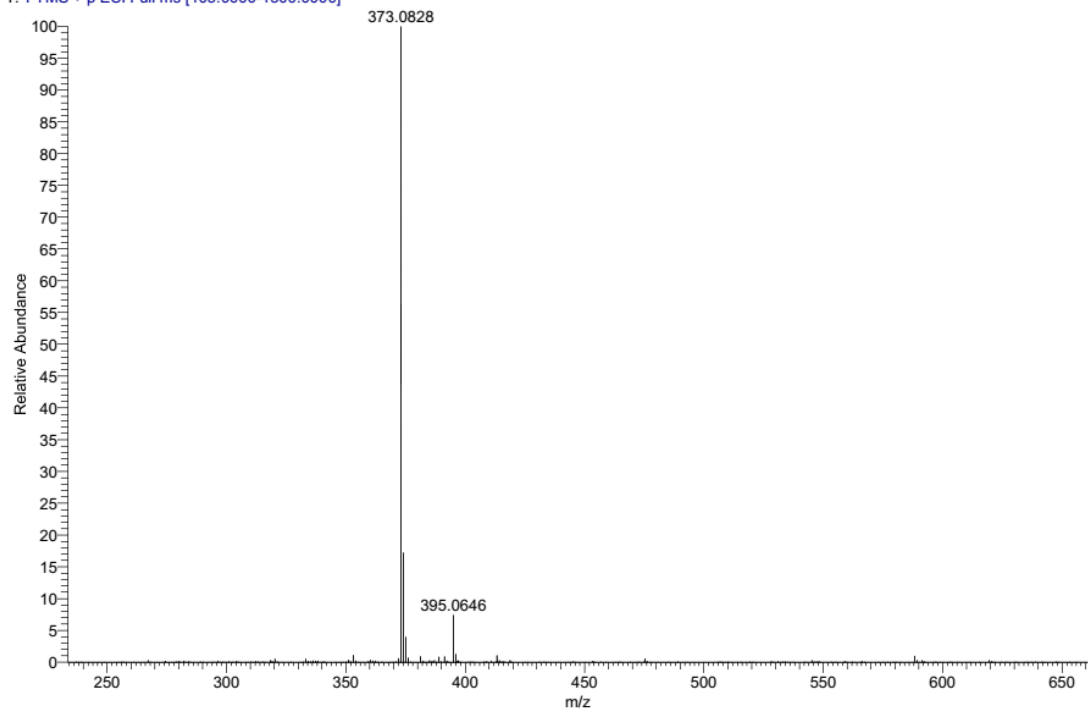

HPLC purity

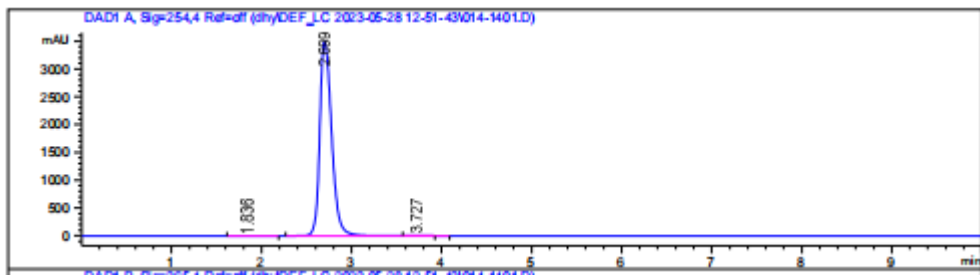

| 峰 # | 保留时间 [min] | 类型   | 峰宽 [min] | 峰面积 [mAU*s] | 峰高 [mAU]   | 峰面积 %   |
|-----|------------|------|----------|-------------|------------|---------|
| 1   | 1.836      | BB   | 0.1487   | 13.67305    | 1.20227    | 0.0424  |
| 2   | 2.699      | BV R | 0.1419   | 3.22347e4   | 3486.67798 | 99.9252 |
| 3   | 3.727      | VB E | 0.1497   | 10.44748    | 1.07173    | 0.0324  |

## I-18

### <sup>1</sup>H-NMR

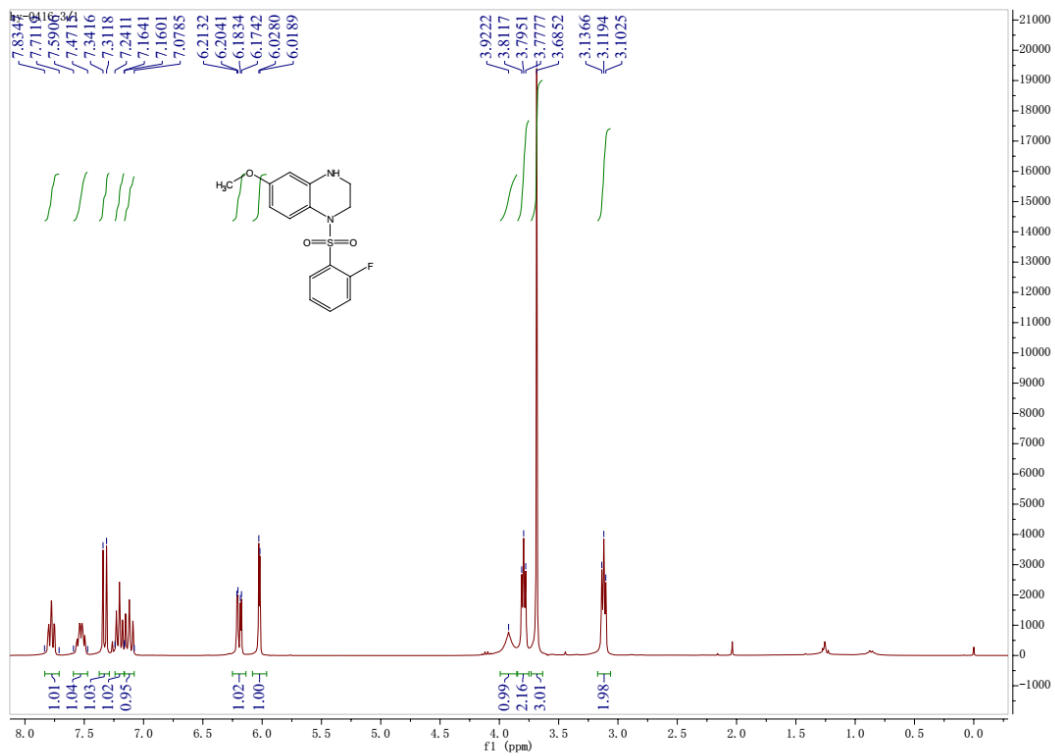

### <sup>13</sup>C-NMR

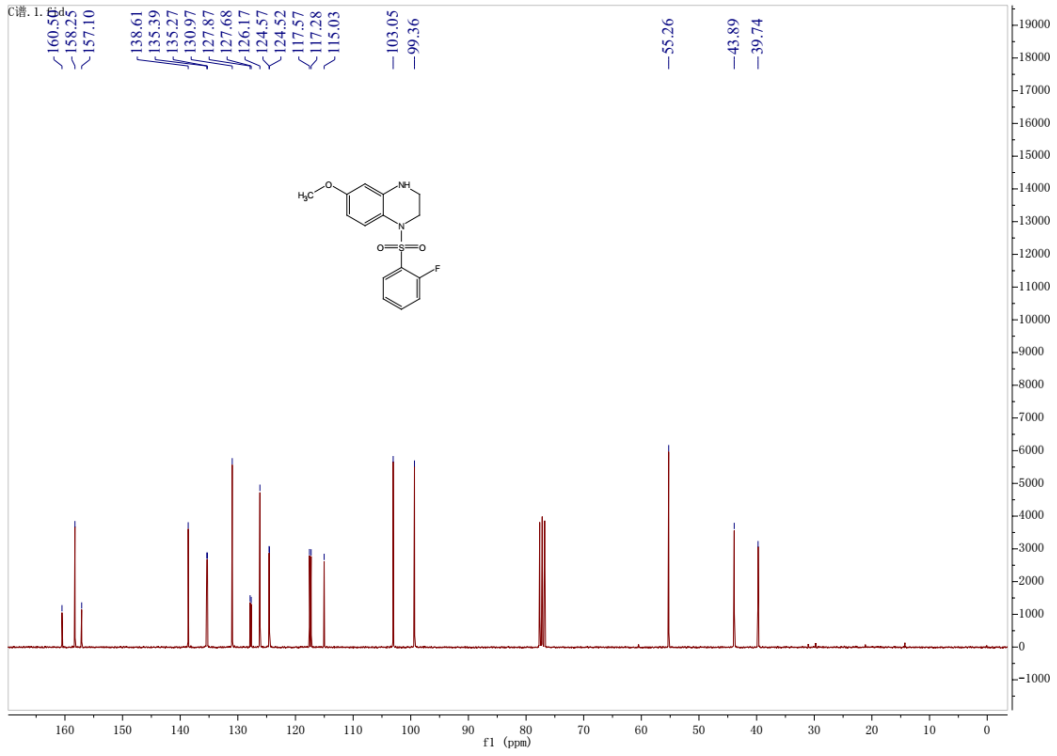

## HRMS

D:\DATA\20221205\11-18

12/05/22 10:55:25

I-18 #21-29 RT: 0.09-0.13 AV: 9 NL: 3.50E9  
T: FTMS + p ESI Full ms [105.0000-1500.0000]

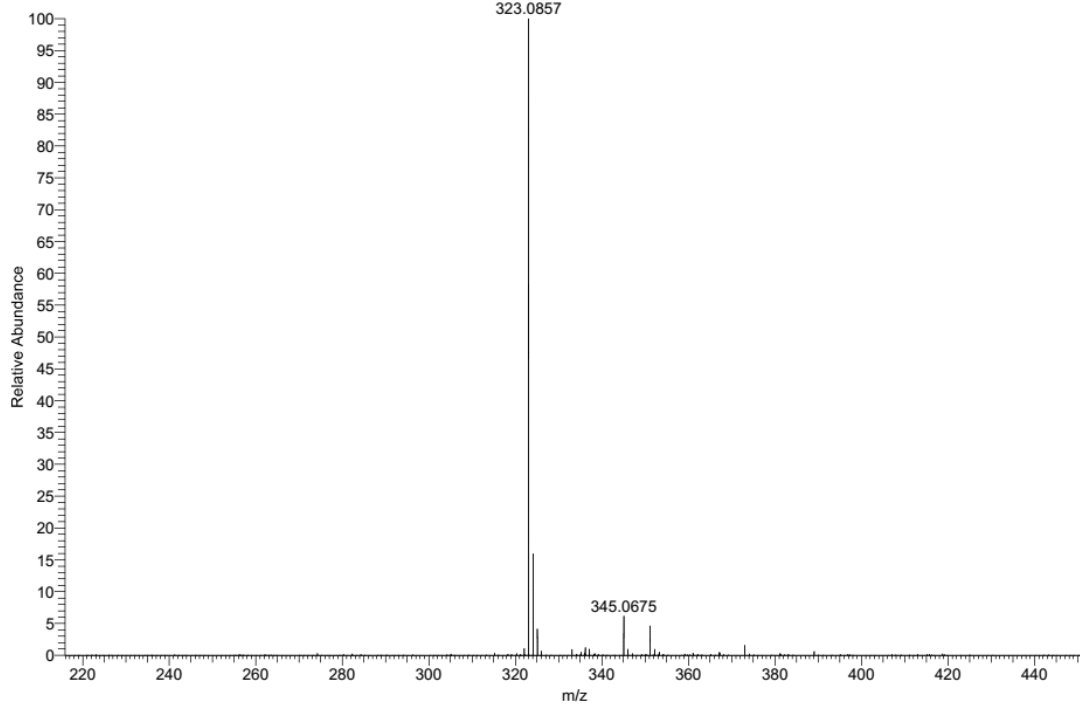

HPLC purity

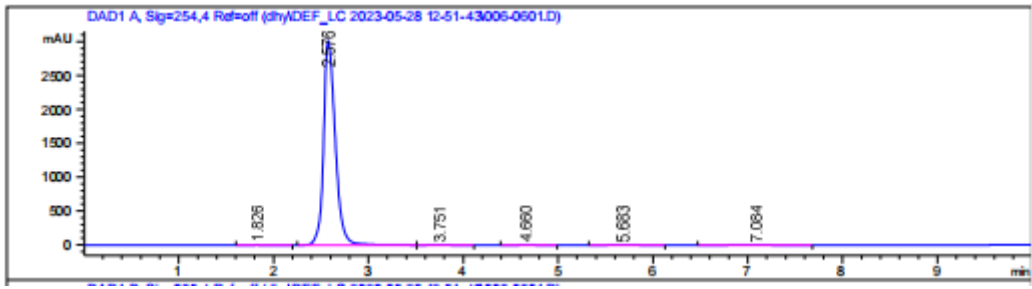

| 峰 # | 保留时间 [min] | 类型 | 峰宽 [min] | 峰面积 [mAU*s] | 峰高 [mAU]   | 峰面积 %   |
|-----|------------|----|----------|-------------|------------|---------|
| 1   | 1.826      | BB | 0.1897   | 18.64995    | 1.57984    | 0.0716  |
| 2   | 2.576      | BB | 0.1324   | 2.58720e4   | 3006.13721 | 99.3715 |
| 3   | 3.751      | BB | 0.1760   | 17.49418    | 1.52353    | 0.0672  |
| 4   | 4.660      | BB | 0.2051   | 19.37649    | 1.45758    | 0.0744  |
| 5   | 5.683      | BB | 0.2755   | 54.87186    | 2.97003    | 0.2108  |
| 6   | 7.084      | BB | 0.4197   | 53.24213    | 1.64470    | 0.2045  |

## I-19

### <sup>1</sup>H-NMR

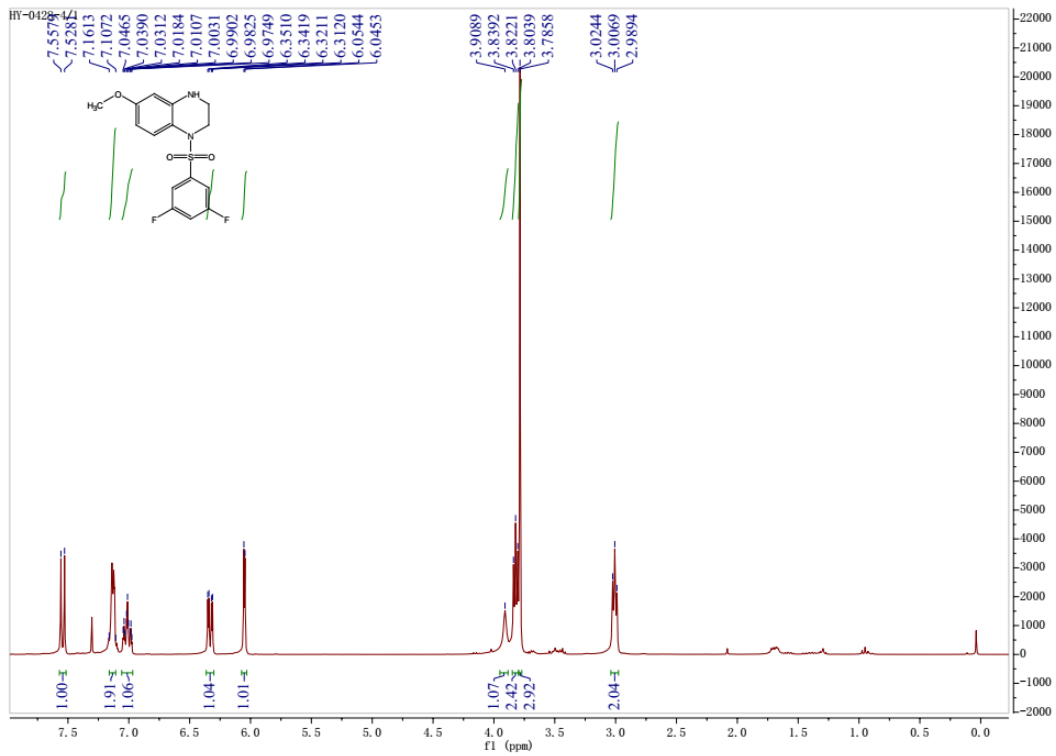

### <sup>13</sup>C-NMR

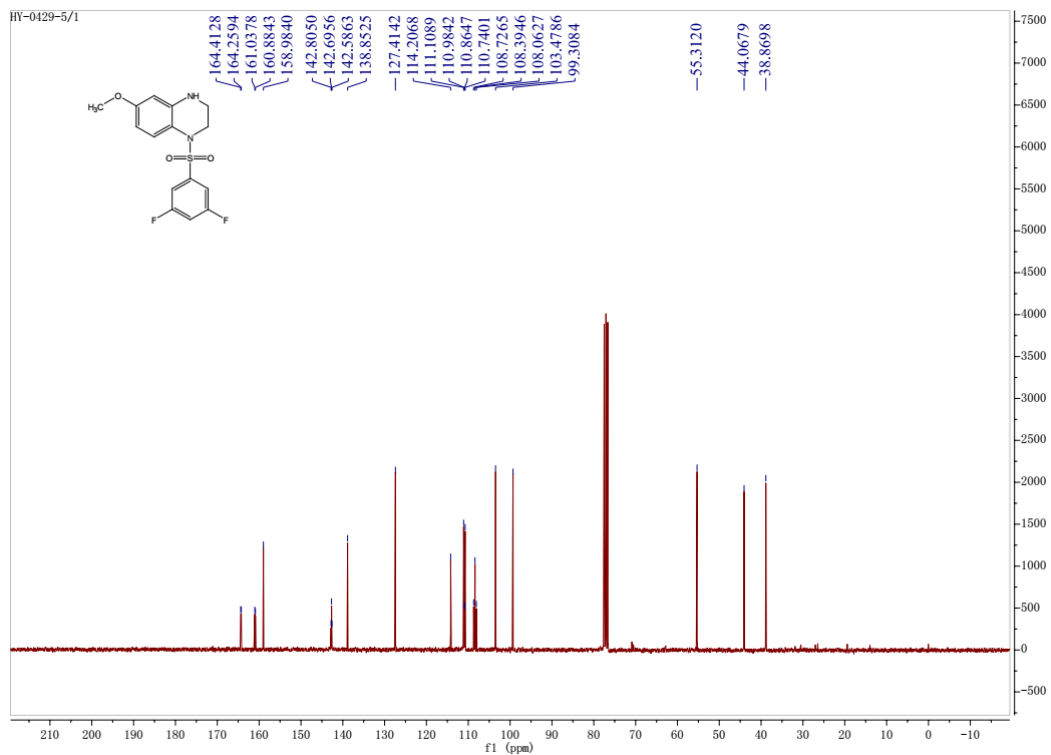

## HRMS

D:\DATA\2022120511\19

12/05/22 10:57:25

I-19 #20-26 RT: 0.09-0.11 AV: 7 NL: 3.67E9  
T: FTMS + p ESI Full ms [105.0000-1500.0000]

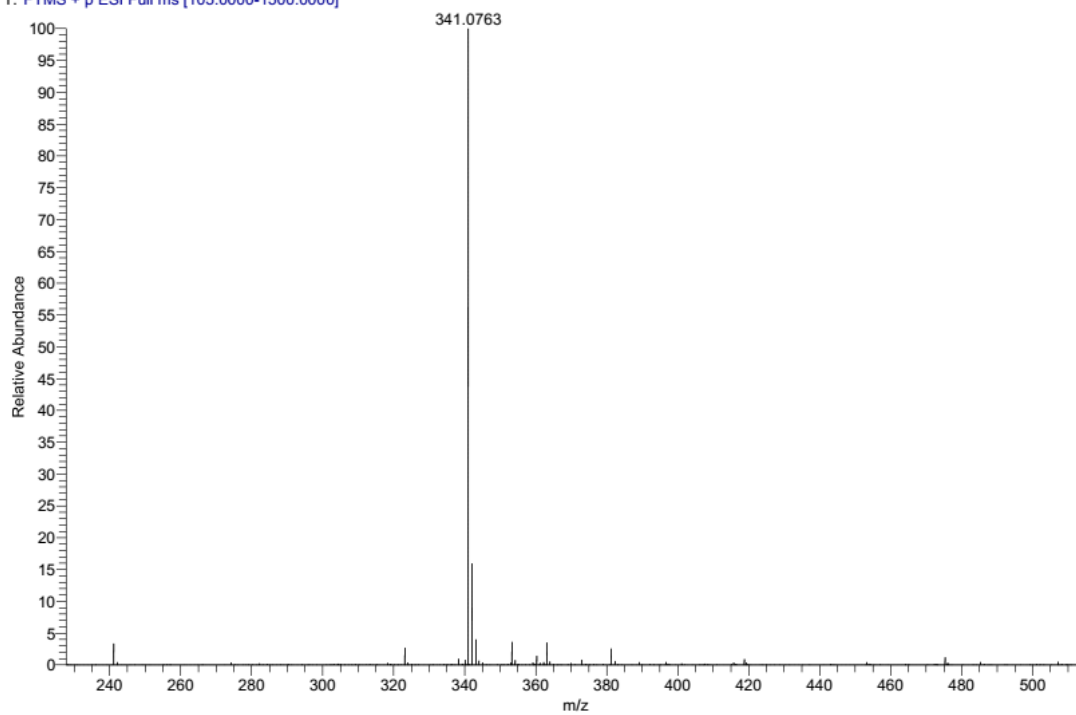

HPLC purity

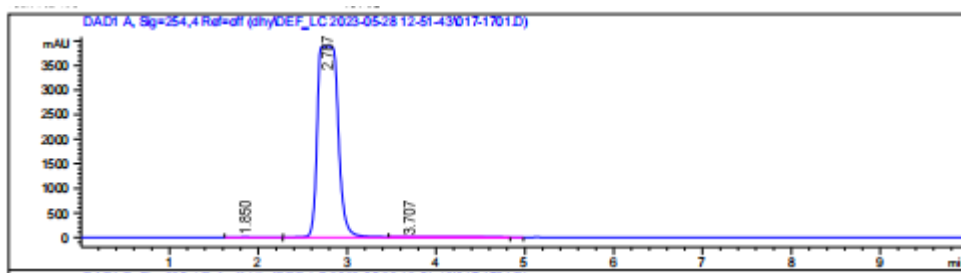

| 峰 # | 保留时间 [min] | 类型   | 峰宽 [min] | 峰面积 [mAU*s] | 峰高 [mAU]   | 峰面积 %   |
|-----|------------|------|----------|-------------|------------|---------|
| 1   | 1.850      | BB   | 0.1042   | 21.48151    | 2.84167    | 0.0344  |
| 2   | 2.787      | BV R | 0.2011   | 6.24416e4   | 3893.15405 | 99.8876 |
| 3   | 3.707      | VB E | 0.2580   | 48.80634    | 2.66085    | 0.0781  |

## I-20

### <sup>1</sup>H-NMR

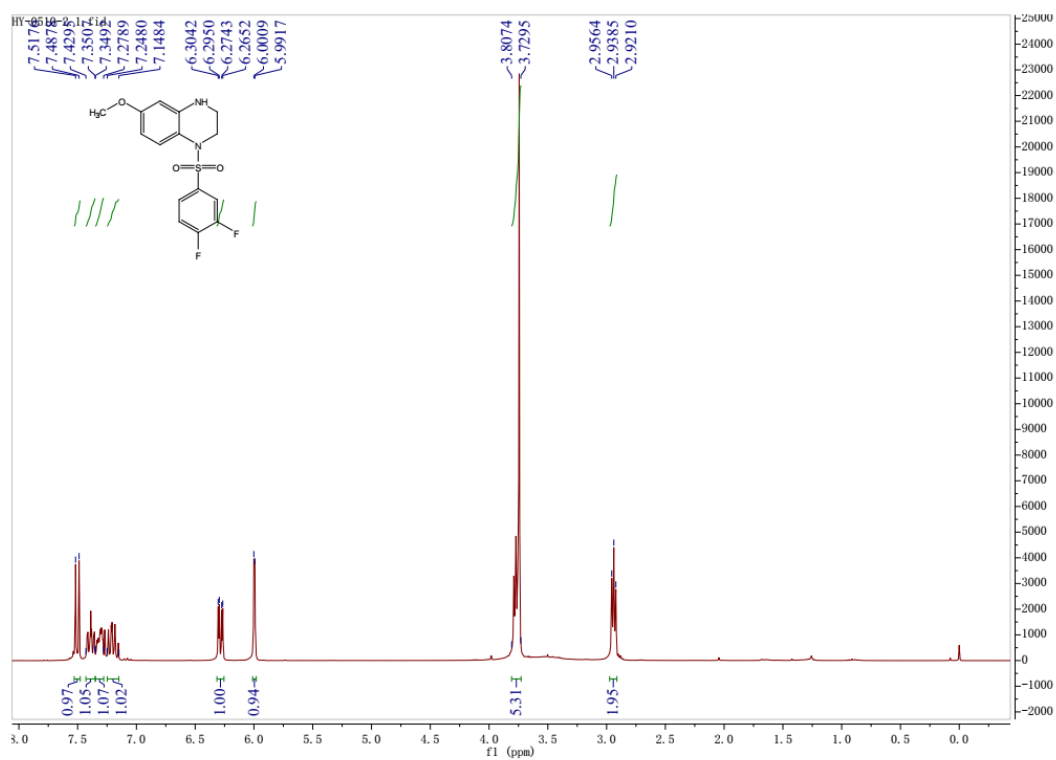

### <sup>13</sup>C-NMR

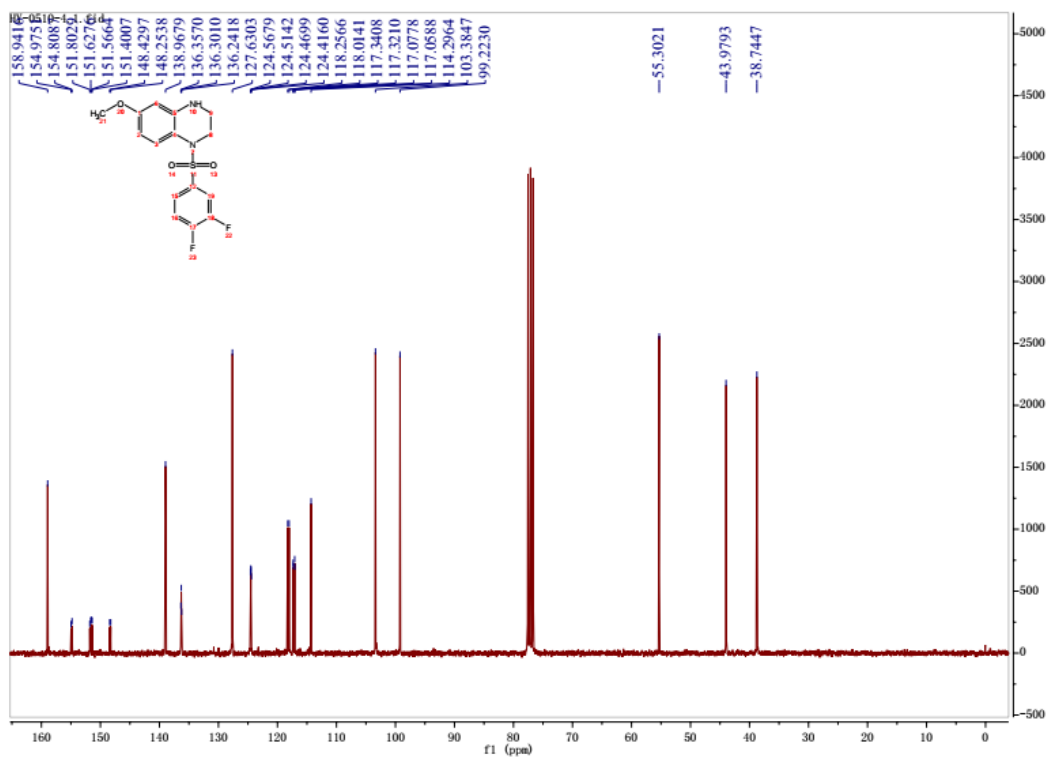

## HRMS

D:\DATA\2022120511\I-20

12/05/22 10:59:26

I-20 #21-26 RT: 0.09-0.11 AV: 6 NL: 2.97E9  
T: FTMS + p ESI Full ms [105.0000-1500.0000]

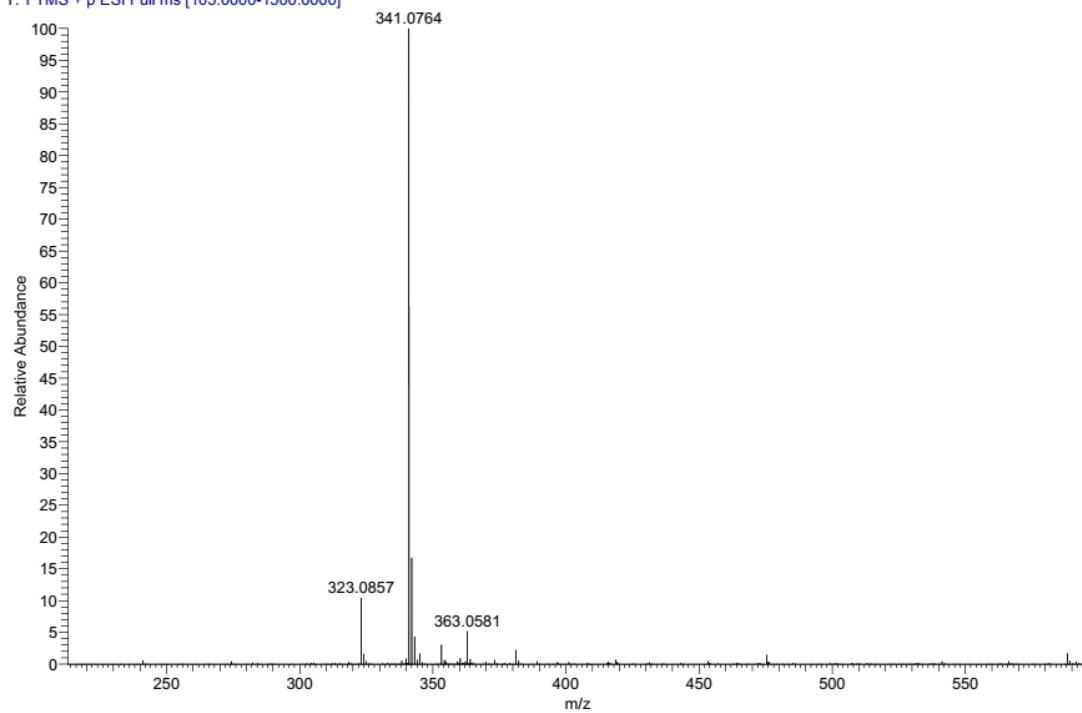

HPLC purity



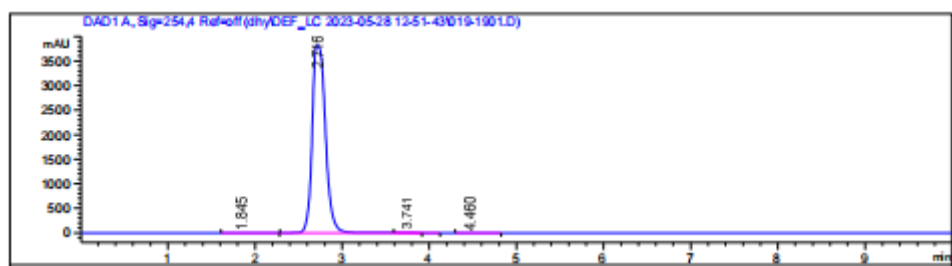

| 峰 # | 保留时间 [min] | 类型   | 峰宽 [min] | 峰面积 [mAU*s] | 峰高 [mAU]   | 峰面积 %   |
|-----|------------|------|----------|-------------|------------|---------|
| 1   | 1.845      | BB   | 0.1659   | 16.14899    | 1.29161    | 0.0398  |
| 2   | 2.716      | BV R | 0.1657   | 4.04873e4   | 3819.50977 | 99.9027 |
| 3   | 3.741      | VB E | 0.1507   | 10.80317    | 1.15950    | 0.0267  |
| 4   | 4.460      | BB   | 0.1829   | 12.46189    | 1.06163    | 0.0307  |

## I-21

### <sup>1</sup>H-NMR

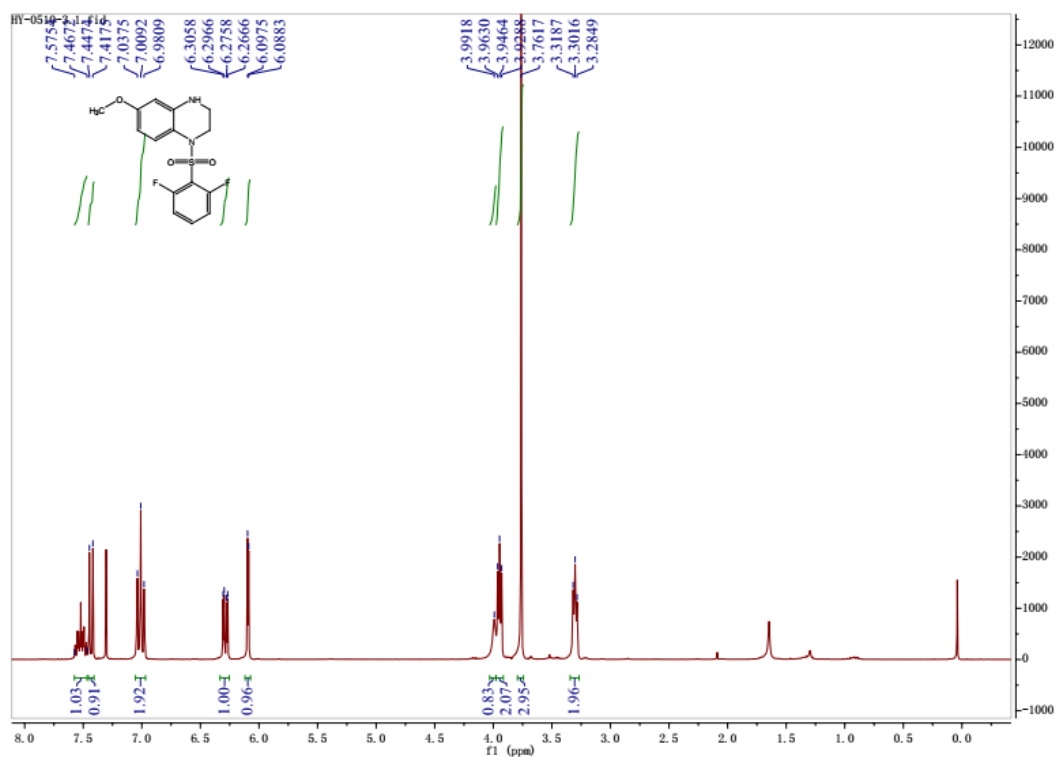

### <sup>13</sup>C-NMR

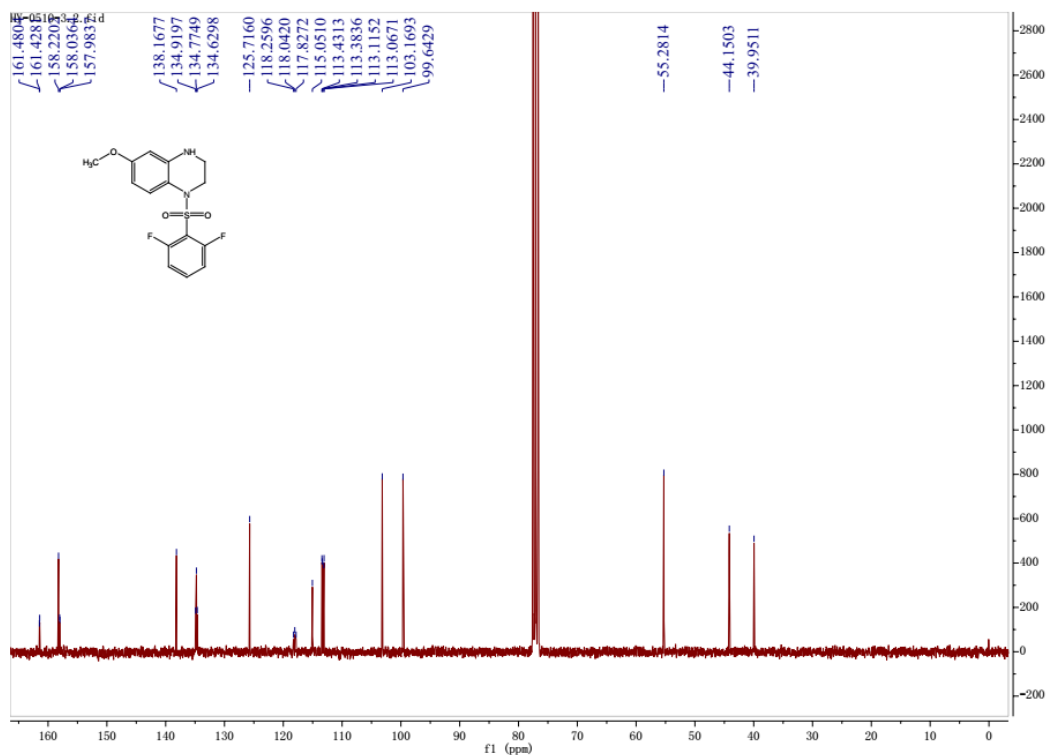

## HRMS

D:\DATA\202212051\W-21

12/05/22 11:01:27

I-21 #22-28 RT: 0.10-0.12 AV: 7 NL: 3.33E9

T: FTMS + p ESI Full ms [105.0000-1500.0000]

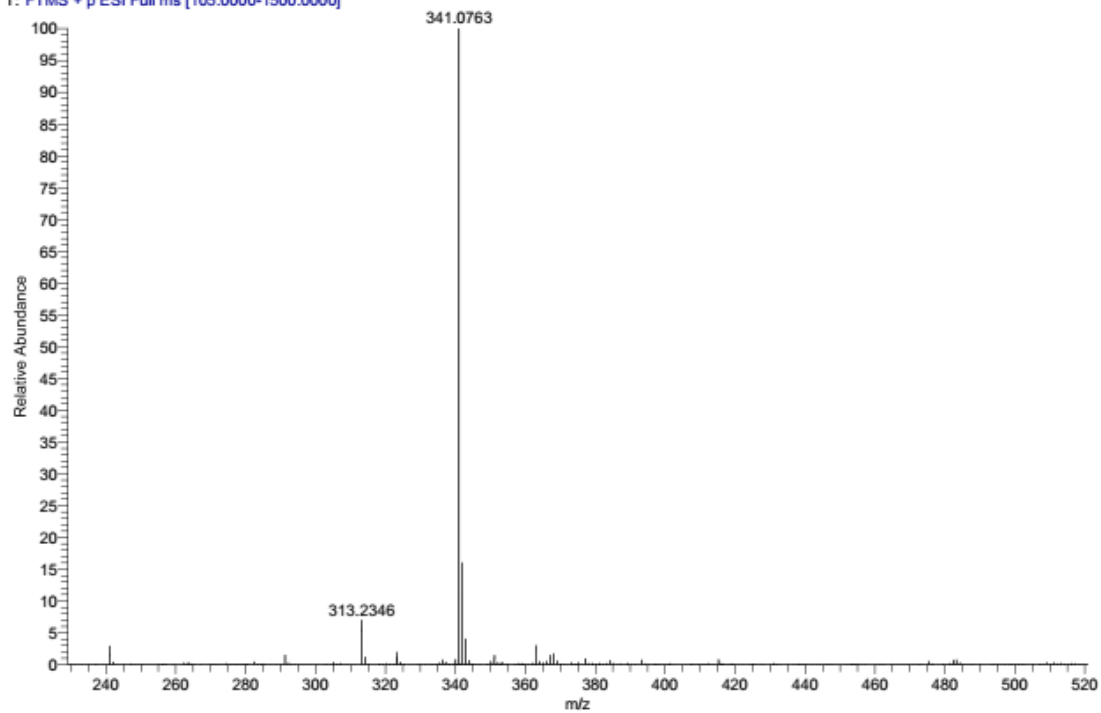

HPLC purity

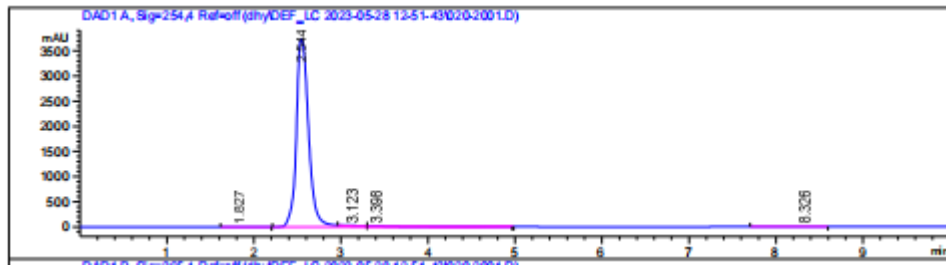

| 峰 # | 保留时间 [min] | 类型   | 峰宽 [min] | 峰面积 [mAU*s] | 峰高 [mAU]   | 峰面积 %   |
|-----|------------|------|----------|-------------|------------|---------|
| 1   | 1.827      | BB   | 0.1682   | 20.95062    | 1.62690    | 0.0558  |
| 2   | 2.544      | BV R | 0.1514   | 3.69006e4   | 3730.16089 | 98.3249 |
| 3   | 3.123      | VV E | 0.2078   | 142.99910   | 9.60058    | 0.3810  |
| 4   | 3.398      | VB E | 0.3223   | 429.64246   | 17.38570   | 1.1448  |
| 5   | 8.326      | BB   | 0.3005   | 35.06787    | 1.75982    | 0.0934  |

## I-22

### <sup>1</sup>H-NMR

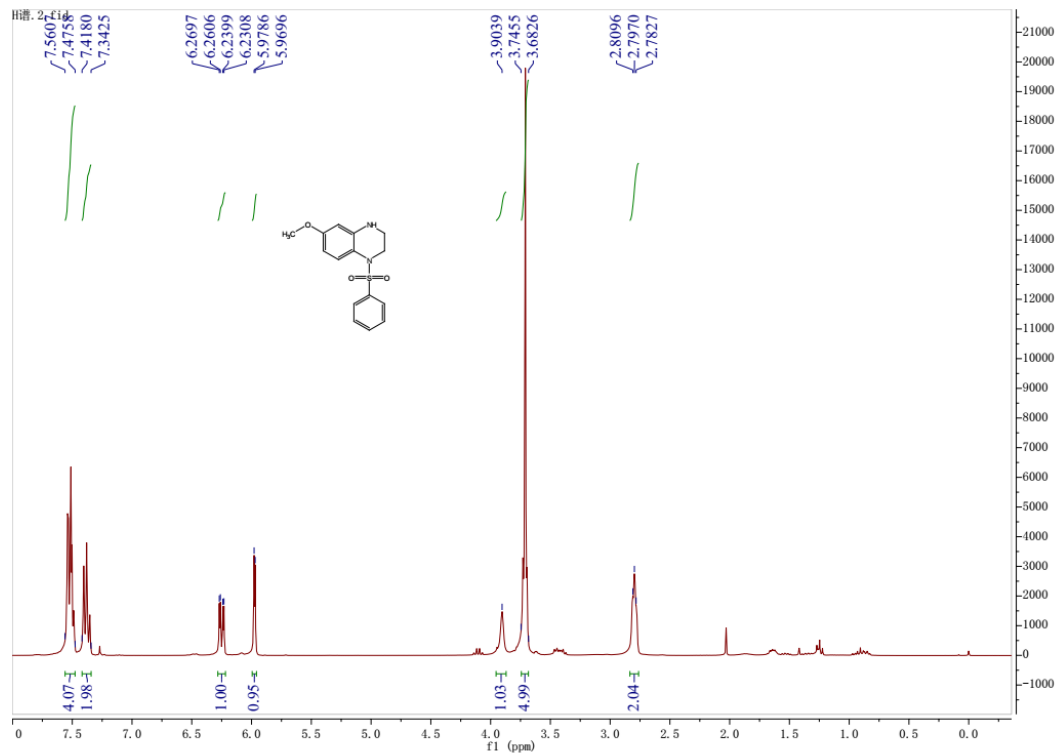

### <sup>13</sup>C-NMR

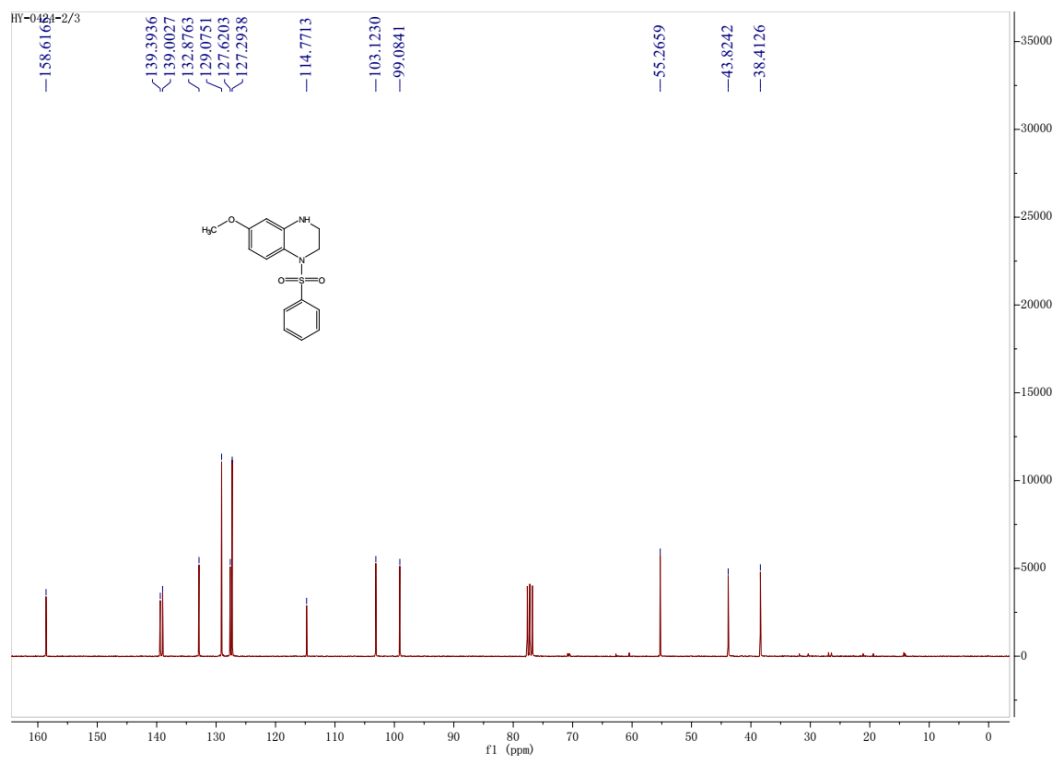

## HRMS

D:\DATA\20221205\14-22

12/05/22 11:03:27

L-22 #24-30 RT: 0.10-0.13 AV: 7 NL: 2.31E9

T: FTMS + p ESI Full ms [105.0000-1500.0000]

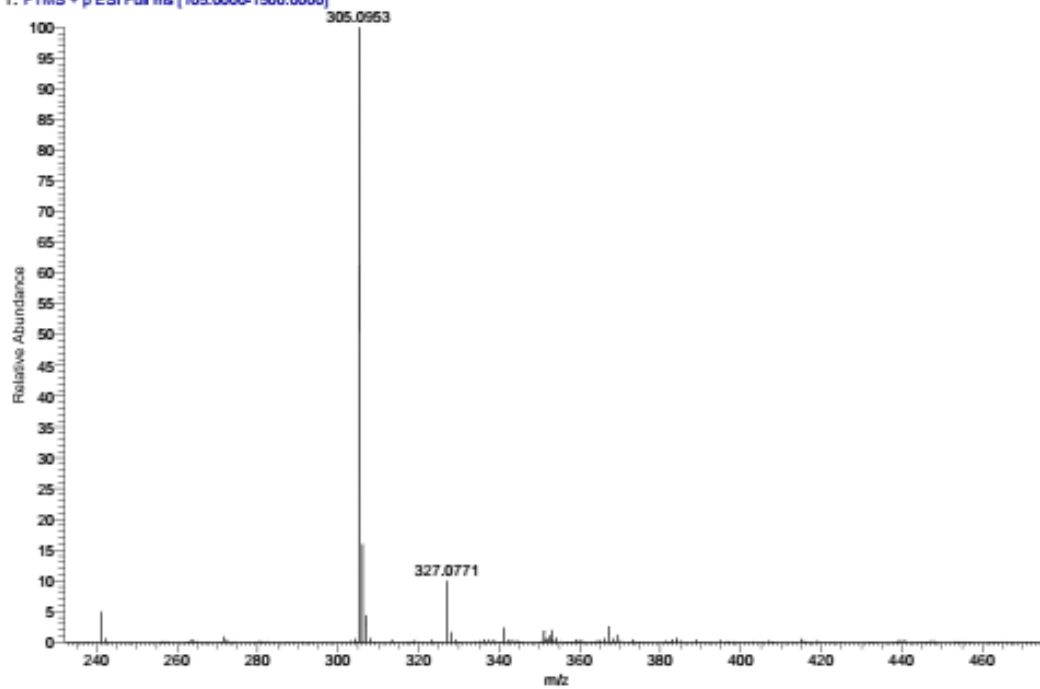

HPLC purity

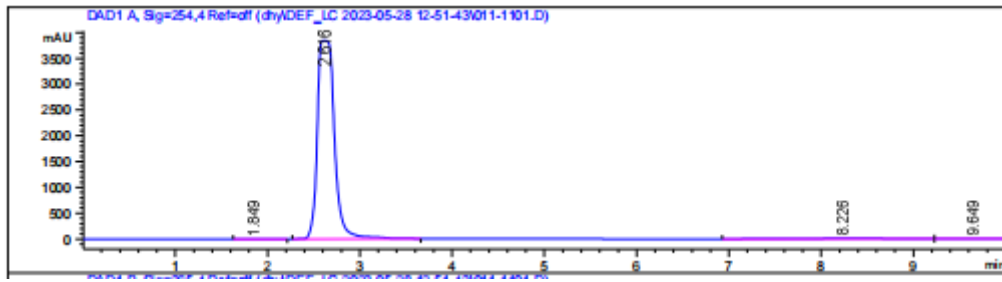

| 峰 # | 保留时间 [min] | 类型  | 峰宽 [min] | 峰面积 [mAU*s] | 峰高 [mAU]   | 峰面积 %   |
|-----|------------|-----|----------|-------------|------------|---------|
| 1   | 1.849      | BB  | 0.1257   | 14.46094    | 1.53729    | 0.0288  |
| 2   | 2.616      | BB  | 0.2024   | 4.95036e4   | 3839.62695 | 98.6978 |
| 3   | 8.226      | BB  | 0.6719   | 592.69482   | 11.26432   | 1.1817  |
| 4   | 9.649      | BBA | 0.4046   | 45.97319    | 1.85833    | 0.0917  |

## I-23

### <sup>1</sup>H-NMR

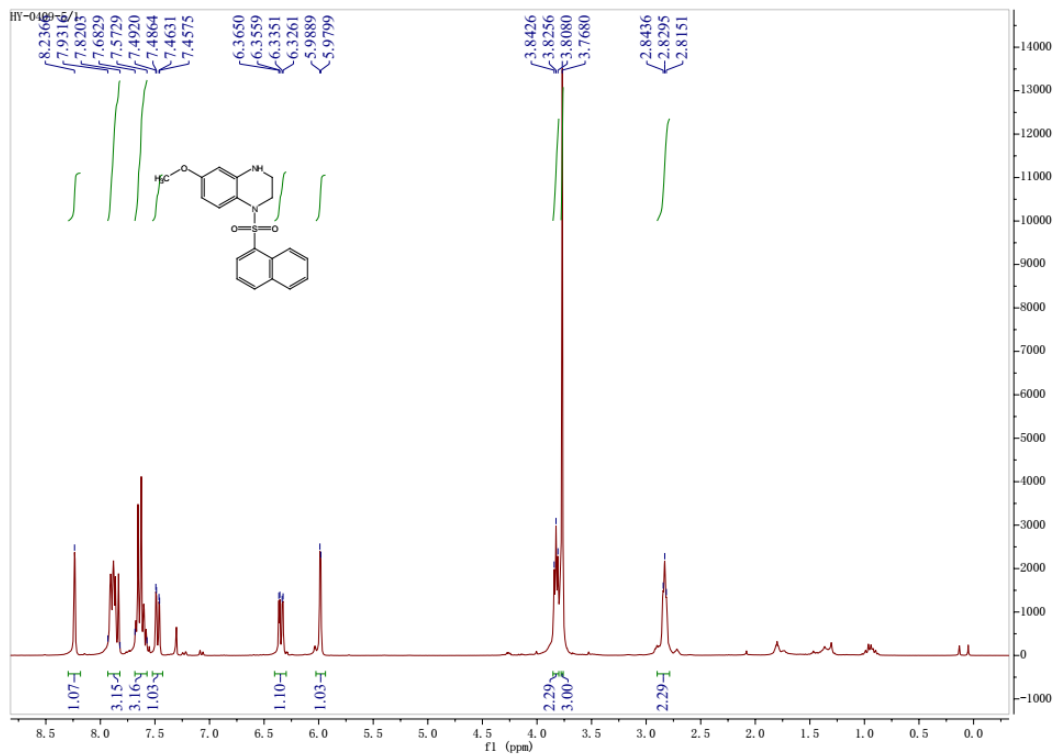

### <sup>13</sup>C-NMR

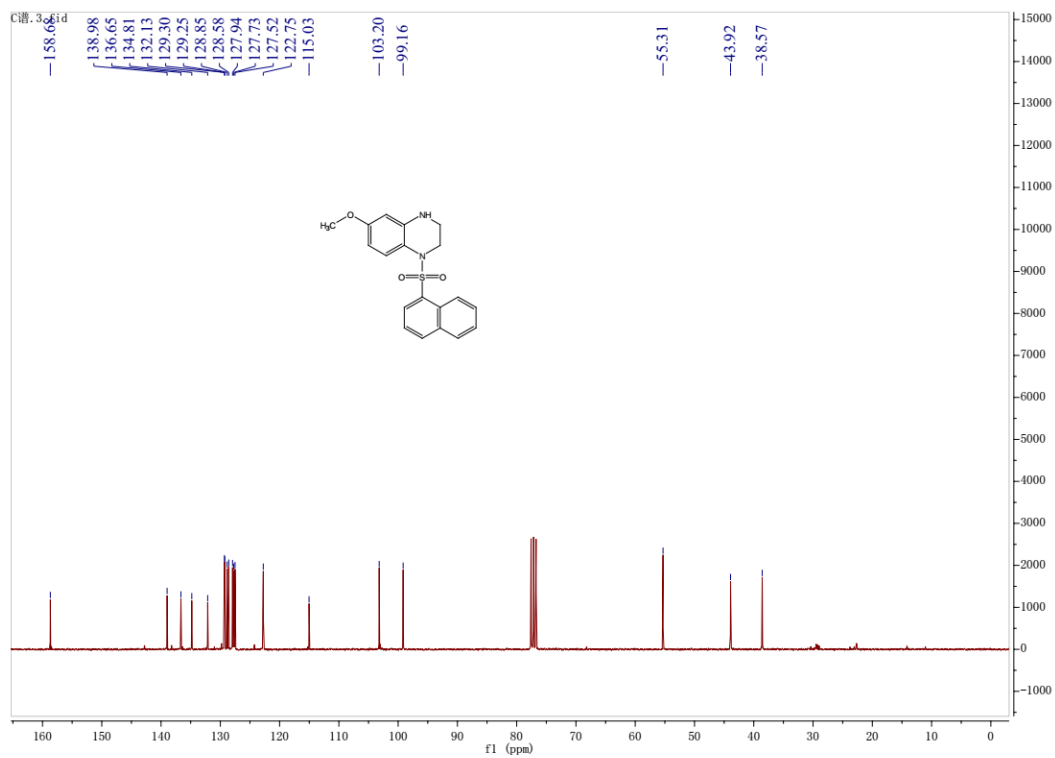

## HRMS

D:\DATA\20221209\I-23

12/09/22 11:08:49

I-23 #19-25 RT: 0.08-0.11 AV: 7 NL: 8.15E8  
T: FTMS + p ESI Full ms [105.0000-1500.0000]

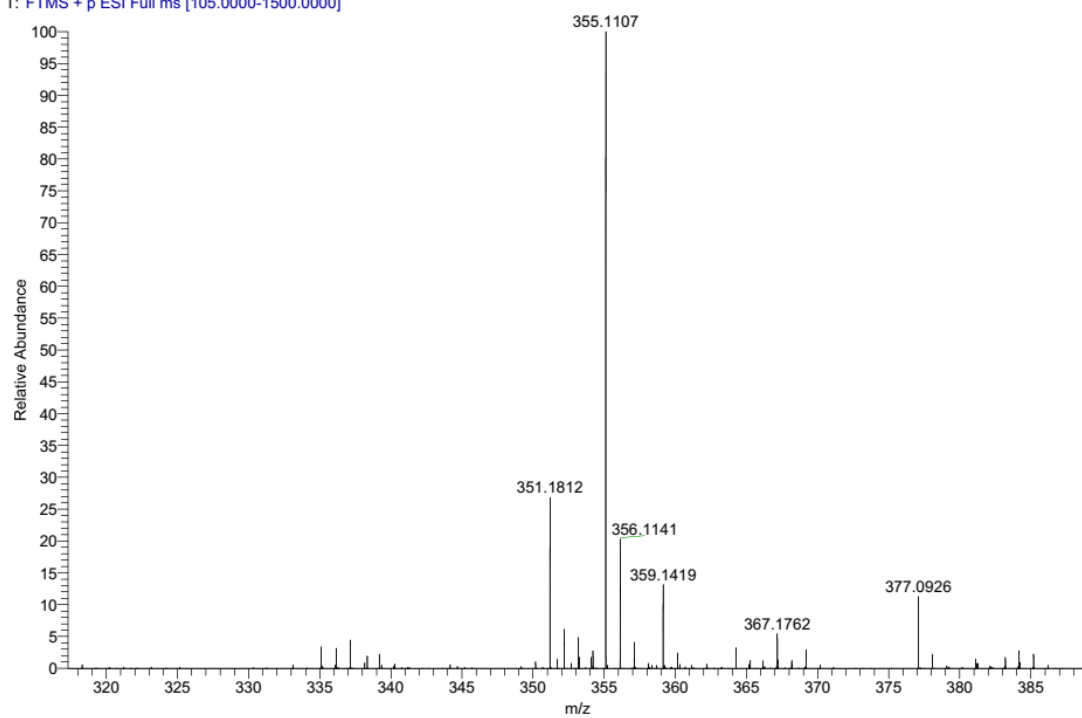

HPLC purity

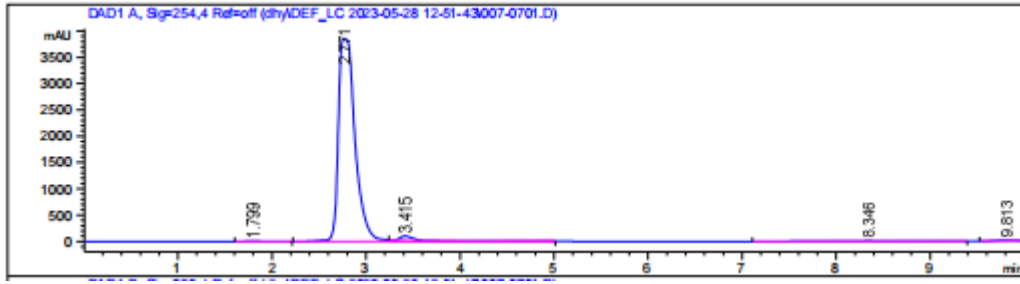

| 峰 # | 保留时间 [min] | 类型   | 峰宽 [min] | 峰面积 [mAU*s] | 峰高 [mAU]   | 峰面积 %   |
|-----|------------|------|----------|-------------|------------|---------|
| 1   | 1.799      | BB   | 0.1655   | 42.54476    | 3.95602    | 0.0862  |
| 2   | 2.771      | BV R | 0.1882   | 4.75982e4   | 3851.61743 | 96.4098 |
| 3   | 3.415      | VB E | 0.1895   | 1162.18054  | 89.48328   | 2.3540  |
| 4   | 8.346      | BB   | 0.6051   | 376.77512   | 8.09414    | 0.7632  |
| 5   | 9.813      | BBA  | 0.2460   | 190.98544   | 13.10363   | 0.3868  |

## I-24

### <sup>1</sup>H-NMR

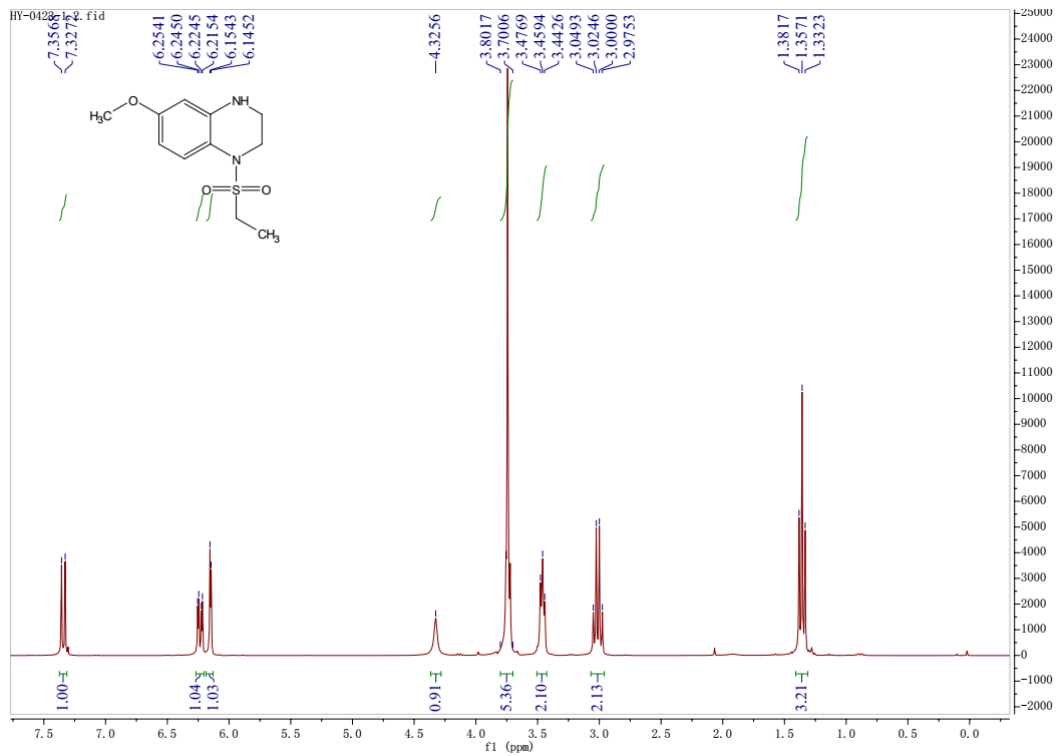

### <sup>13</sup>C-NMR

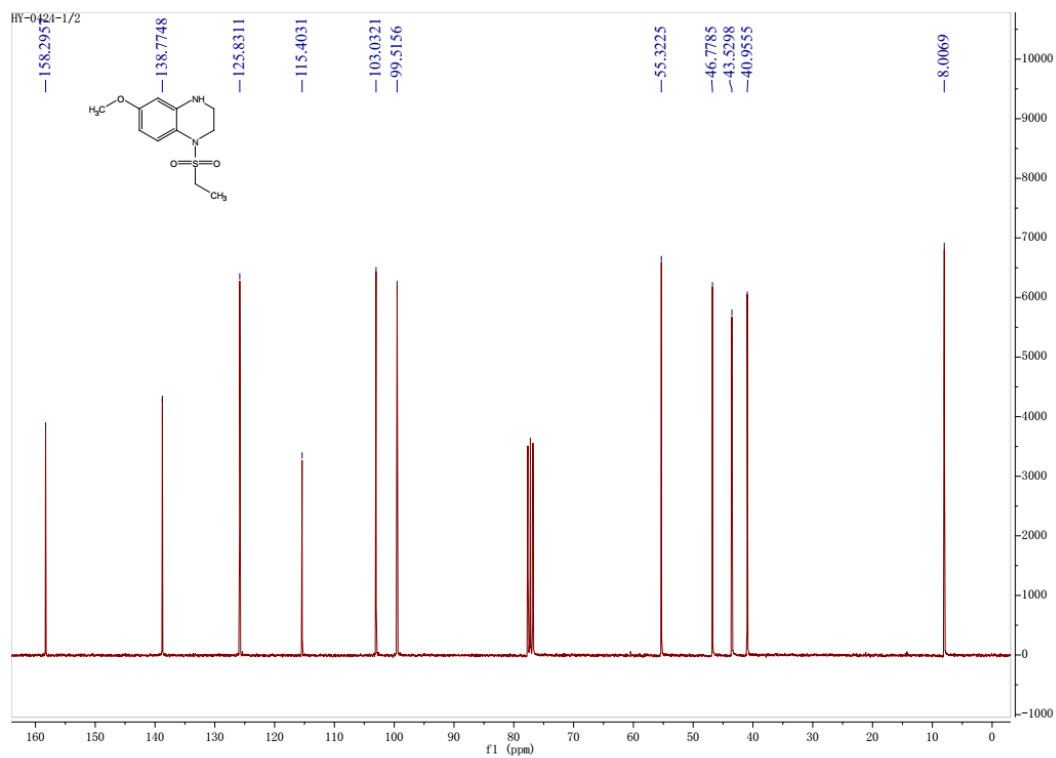

## HRMS

D:\DATA\20221205\1\I-24

12/05/22 11:07:29

I-24 #21-27 RT: 0.09-0.12 AV: 7 NL: 6.52E9  
T: FTMS + p ESI Full ms [105.0000-1500.0000]

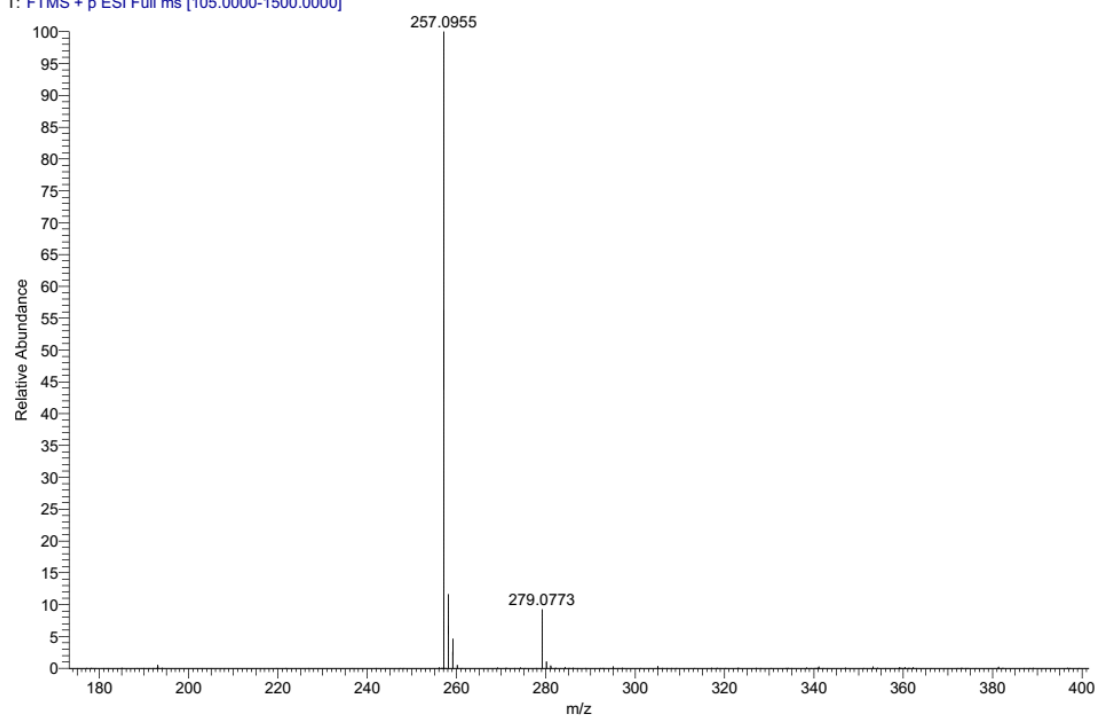

HPLC purity



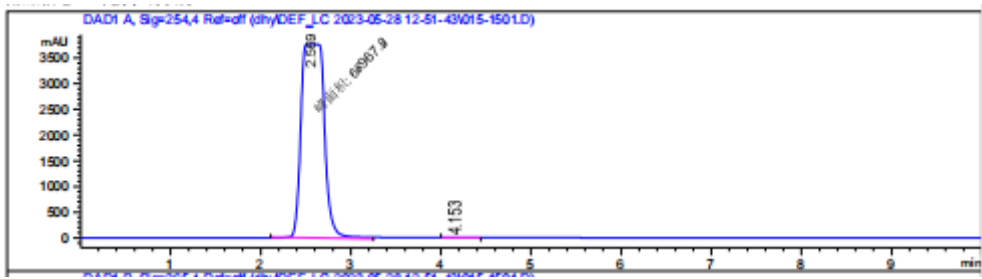

| 峰 # | 保留时间 [min] | 类型 | 峰宽 [min] | 峰面积 [mAU*s] | 峰高 [mAU]   | 峰面积 %   |
|-----|------------|----|----------|-------------|------------|---------|
| 1   | 2.569      | MM | 0.2961   | 6.69678e4   | 3769.74097 | 99.9377 |
| 2   | 4.153      | BB | 0.1745   | 41.74950    | 3.85147    | 0.0623  |

I-25

<sup>1</sup>H-NMR

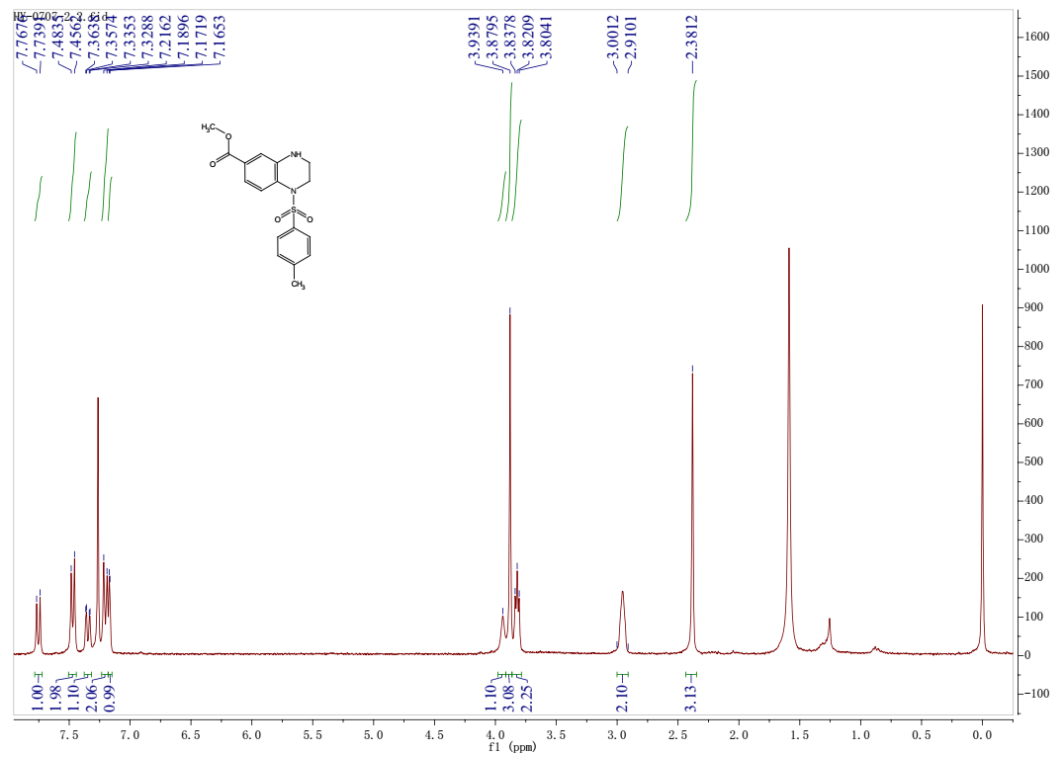

<sup>13</sup>C-NMR

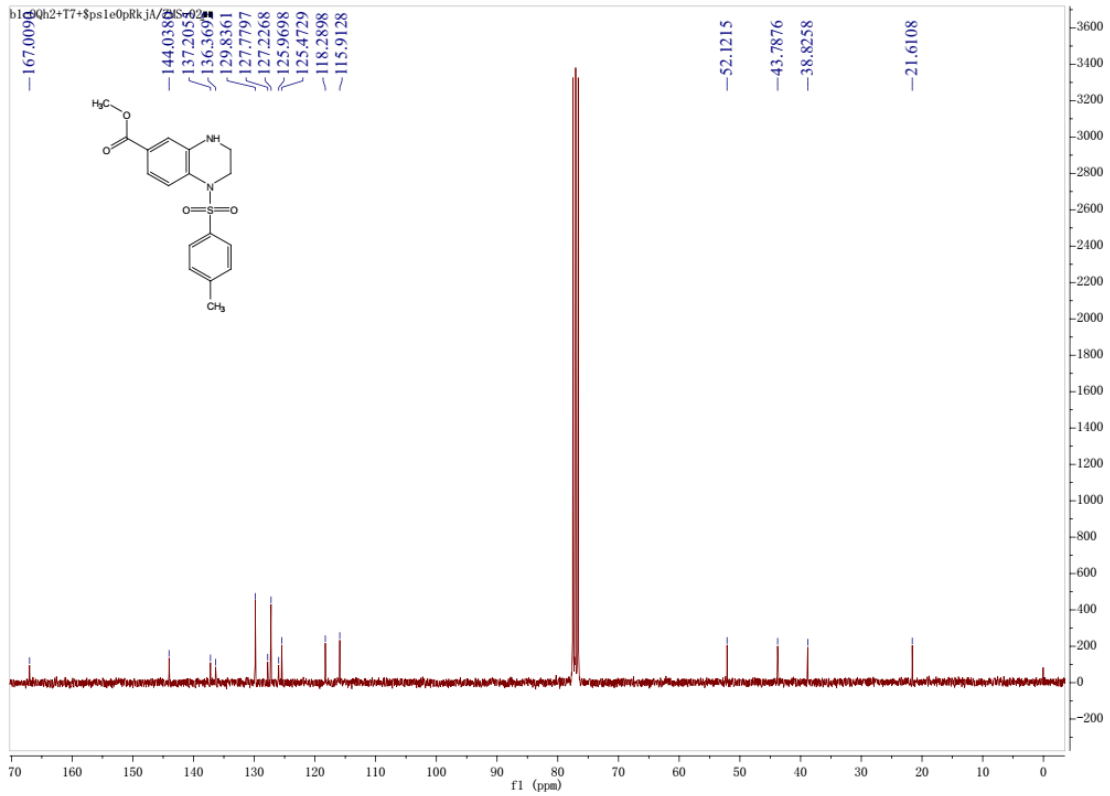

## HRMS

D:\DATA\20221209\I-25

12/09/22 11:10:50

I-25 #19-25 RT: 0.08-0.11 AV: 7 NL: 4.50E8  
T: FTMS + p ESI Full ms [105.0000-1500.0000]

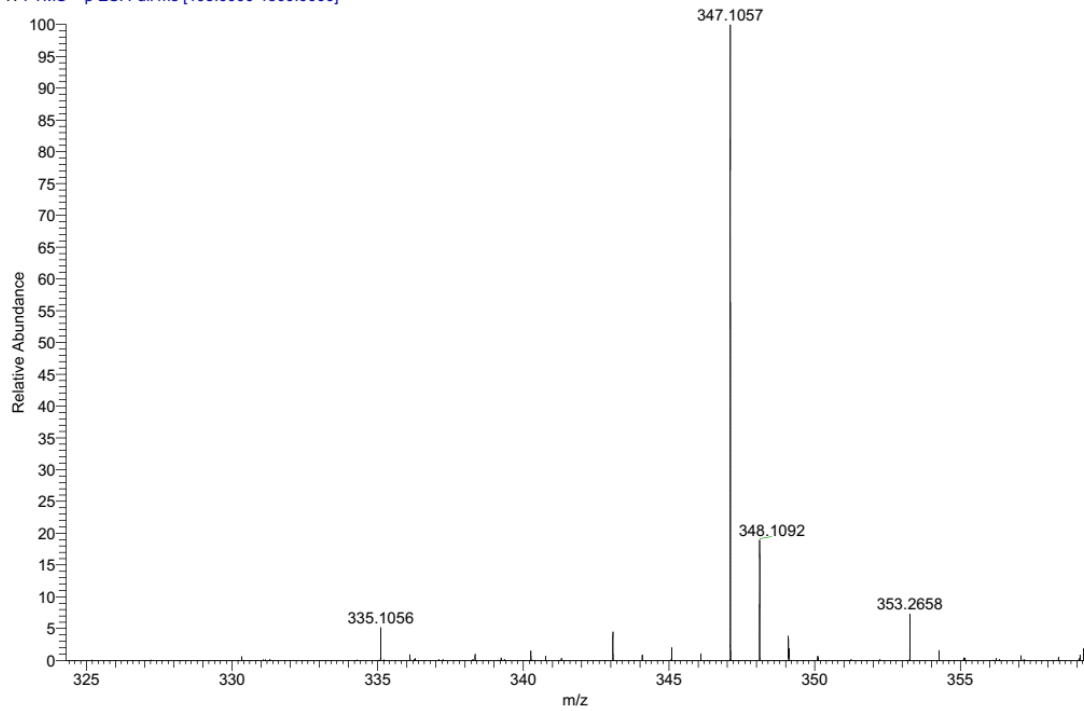

HPLC purity

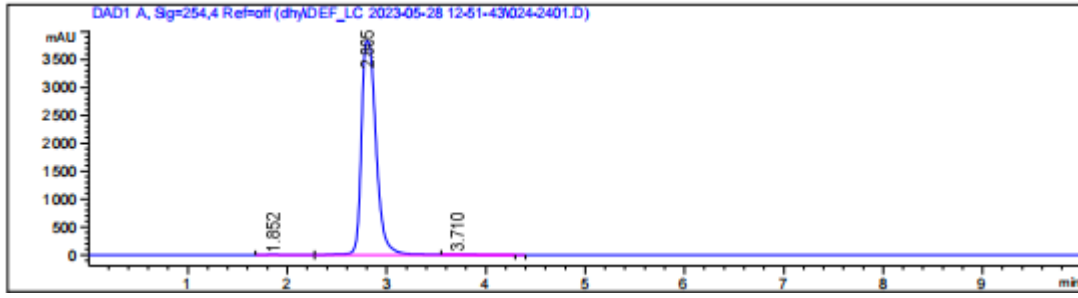

| 峰 # | 保留时间 [min] | 类型   | 峰宽 [min] | 峰面积 [mAU*s] | 峰高 [mAU]   | 峰面积 %   |
|-----|------------|------|----------|-------------|------------|---------|
| 1   | 1.852      | BB   | 0.0862   | 38.39258    | 6.38451    | 0.0977  |
| 2   | 2.805      | BV R | 0.1593   | 3.92300e4   | 3837.58911 | 99.8214 |
| 3   | 3.710      | VB E | 0.2116   | 31.80025    | 2.13689    | 0.0809  |

## I-26

### <sup>1</sup>H-NMR

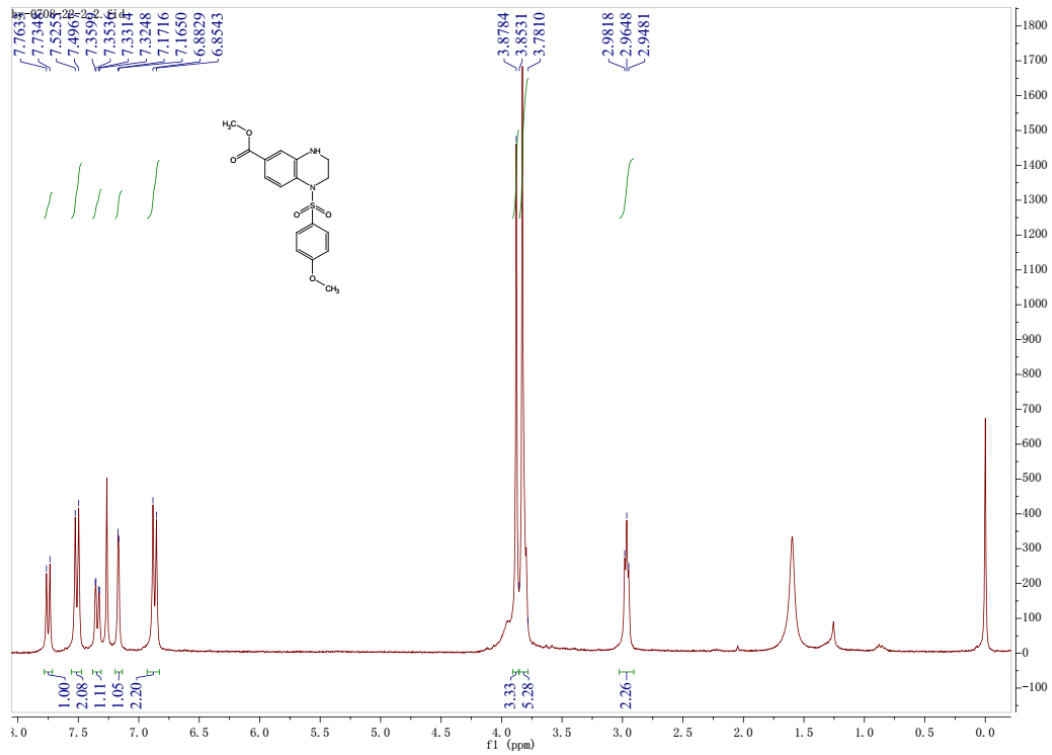

### <sup>13</sup>C-NMR

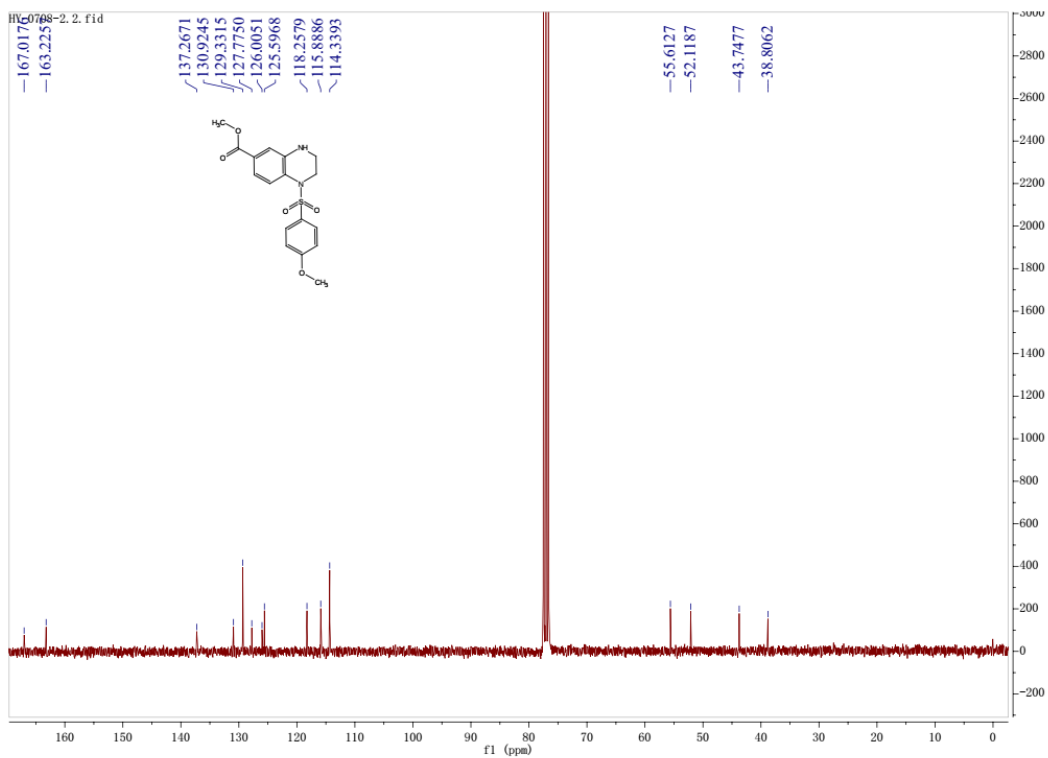

## HRMS

D:\DATA\20221209\I-26

12/09/22 11:12:50

I-26 #20-25 RT: 0.09-0.11 AV: 6 NL: 3.11E8  
T: FTMS + p ESI Full ms [105.0000-1500.0000]

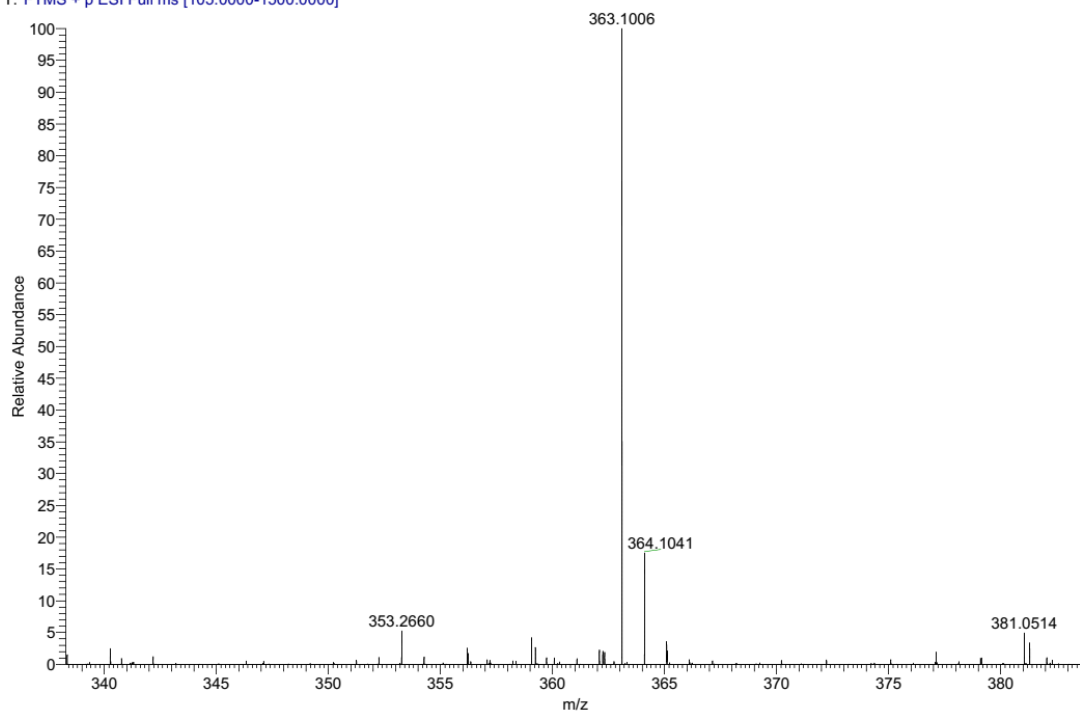

HPLC purity

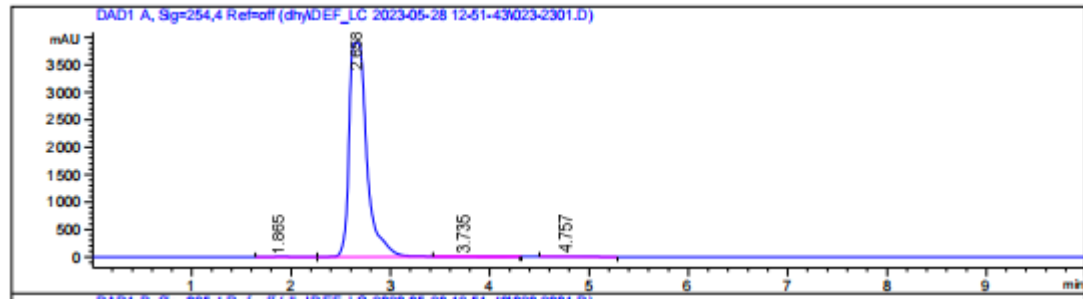

| 峰 # | 保留时间 [min] | 类型   | 峰宽 [min] | 峰面积 [mAU*s] | 峰高 [mAU]   | 峰面积 %   |
|-----|------------|------|----------|-------------|------------|---------|
| 1   | 1.865      | BV   | 0.1677   | 30.02051    | 2.30833    | 0.0615  |
| 2   | 2.658      | VV R | 0.1915   | 4.86709e4   | 3902.44629 | 99.7257 |
| 3   | 3.735      | VB E | 0.2801   | 79.69418    | 3.65877    | 0.1633  |
| 4   | 4.757      | BB   | 0.2349   | 24.16605    | 1.41780    | 0.0495  |
